# Supplementary material for: Molybdenum trioxide as a newer diversified economic catalyst for the transformation of nitroarenes to arylamine and 5-substituted-1 H -tetrazole
Source: Royal Society of Chemistry journal article supplement (doi:10.1039/d4ra05443a), 2024-01-01

## **Supplementary Data**

**Molybdenum trioxide as a newer diversified economic catalyst for the transformation of nitroarenes to arylamine and 5-substituted-1*H*-tetrazole**

Anand Maurya, Upendra Kumar Patel, Sanjeev Kumar, & Alka Agarwal\*

Department of Medicinal Chemistry, Institute of Medical Sciences, Banaras Hindu University, Varanasi-221005, Uttar Pradesh, India

\*Email: [agarwal.dralka@gmail.com](mailto:agarwal.dralka@gmail.com)

## **Contents-**

1. The calculation for green chemistry metrics for compound 5g.
2.  $^1\text{H}$  &  $^{13}\text{C}$  NMR data of amine derivatives.
3.  $^1\text{H}$  &  $^{13}\text{C}$  NMR data of 5-substituted-1*H*-tetrazoles derivatives.
4. Physical data of synthesized arylamine derivatives.
5. Physical data of synthesized 5-substituted-1*H*-tetrazole derivatives.
6. Physical data of 4-chloroaniline and 5-phenyl-1*H*-tetrazole after the seventh cycle.

## 1. The calculation for green chemistry metrics for compound 5g.

**Table S1:** The calculation for green chemistry metrics for compound 5g.

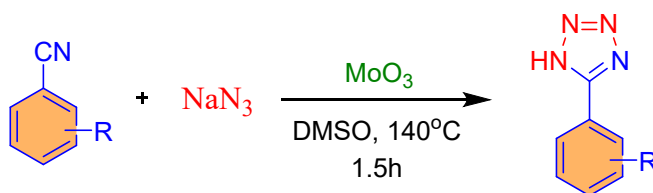

| Details                         | Nitrile | Sodium azide | Product |
|---------------------------------|---------|--------------|---------|
| <b>Molecular weight (g/mol)</b> | 103.12  | 65.01        | 146.15  |
| <b>Mmol</b>                     | 1.0     | 1.5          | 0.91    |
| <b>Amount in mg</b>             | 0.103   | 0.094        | 0.144   |

| S. No. | Parameters                   | Formula                                                                   | Characteristics                                                                       | Ideal value | Calculated value for compound     |
|--------|------------------------------|---------------------------------------------------------------------------|---------------------------------------------------------------------------------------|-------------|-----------------------------------|
| 1      | Environmental (E) factor     | [Total mass of raw materials - the total mass of product]/mass of product | E-factor shows the total amount of waste generated in a chemical reaction.            | 0           | [(0.103+0.094)-0.144]/0.144 =0.36 |
| 2      | Process mass intensity (PMI) | $\Sigma$ (mass of materials)/[Total mass of isolated product]             | PMI takes into account reaction efficiency, stoichiometry, amount of solvent, and all | 1           | (0.103+0.094)/0.144 =1.36         |

---

|   |                                  |                                                                                         |                                                                                                                                                                                                                                                              |      |                                                   |
|---|----------------------------------|-----------------------------------------------------------------------------------------|--------------------------------------------------------------------------------------------------------------------------------------------------------------------------------------------------------------------------------------------------------------|------|---------------------------------------------------|
|   |                                  |                                                                                         | reagent used in the chemical reaction.                                                                                                                                                                                                                       |      |                                                   |
| 3 | Reaction mass efficiency (RME %) | $[\text{mass of product} / \Sigma(\text{mass of stoichiometric reactants})] \times 100$ | RME accounts into atom economy, chemical yield, and stoichiometry.                                                                                                                                                                                           | 100% | $[0.144 / (0.103 + 0.094)] \times 100 = 73.09\%$  |
| 4 | Atom economy                     | $[\text{MW of product}] \div \Sigma(\text{MW of stoichiometric reactants}) \times 100$  | Atom economy signifies the percentage of atoms wasted in a chemical reaction. The higher the value of AE, the greener is the reaction. The maximum value of atom economy is 100% which indicates that all the atoms present in reactants lie in the product. | 100% | $[(146.15) / (103.12 + 94.25)] \times 100 = 74\%$ |
| 5 | Carbon efficiency                | [Amount of carbon in                                                                    | CE signifies the percentage of                                                                                                                                                                                                                               | 100% | $[7 / (7)] \times 100 = 100\%$                    |

---

(CE %)

product/Tot carbons in the  
al reactants that  
carbon are  
present left in the  
in product.  
reactants] $\times 1$   
00

---

## 2. NMR (<sup>1</sup>H & <sup>13</sup>C) data of amine derivatives

### *2-chloroaniline (2a)*

Colorless liquid. Yield: 88 % (71 mg). <sup>1</sup>H NMR (600 MHz, CDCl<sub>3</sub>) δ 7.37 (d, *J* = 7.1 Hz, 1H, Ar-H), 7.06 (t, *J* = 7.1 Hz, 1H, Ar-H), 6.70 (d, *J* = 6.8 Hz, 1H, Ar-H), 6.59 – 6.57 (m, 1H, Ar-H), 4.02 (s, 2H, -NH<sub>2</sub>); <sup>13</sup>C NMR (151 MHz, CDCl<sub>3</sub>) δ 142.97, 129.44, 127.68, 119.31, 119.06, 115.95.

### *4-bromoaniline (2b)*

Light yellowish solid. Yield: 90 % (77 mg); mp 66-68 °C. <sup>1</sup>H NMR (600 MHz, CDCl<sub>3</sub>) δ 7.22 (d, *J* = 8.5 Hz, 2H, Ar-H), 6.54 (d, *J* = 8.6 Hz, 2H, Ar-H), 3.65 (s, 2H, -NH<sub>2</sub>); <sup>13</sup>C NMR (151 MHz, CDCl<sub>3</sub>) δ 145.42, 131.97, 116.70, 110.12.

### *3-chloroaniline (2c)*

Yellowish liquid. Yield: 89 % (72 mg). <sup>1</sup>H NMR (600 MHz, CDCl<sub>3</sub>) δ 7.00 (t, *J* = 8.0 Hz, 1H, Ar-H), 6.68 (dd, *J* = 8.0, 1.7 Hz, 1H, Ar-H), 6.57 (s, 1H, Ar-H), 6.45 (dd, *J* = 8.1, 2.1 Hz, 1H, Ar-H), 3.65 (s, 2H, -NH<sub>2</sub>); <sup>13</sup>C NMR (151 MHz, CDCl<sub>3</sub>) δ 147.94, 134.81, 130.52, 118.40, 114.99, 113.42.

### *4-aminobenzoic acid (2d)*

Yellow solid. Yield: 90 % (74 mg); mp 182-184 °C. <sup>1</sup>H NMR (600 MHz, CDCl<sub>3</sub>) δ 7.91 (d, *J* = 8.6 Hz, 2H, Ar-H), 6.66 (d, *J* = 8.6 Hz, 2H, Ar-H), 4.12 (s, 2H, -NH<sub>2</sub>); <sup>13</sup>C NMR (151 MHz, CDCl<sub>3</sub>) δ 168.77, 153.06, 151.70, 151.65, 131.59, 118.92, 113.36.

### *3-amino benzaldehyde (2e)*

Light yellow solid. Yield: 86 % (69 mg); mp 30-32 °C. <sup>1</sup>H NMR (600 MHz, DMSO-d<sub>6</sub>) δ 8.49 (s, 1H, -CHO), 7.16 – 7.08 (m, 2H, Ar-H), 6.98 (d, *J* = 7.3 Hz, 1H, Ar-H), 6.72 (d, *J* = 7.5 Hz, 1H, Ar-H), 5.28 (s, 2H, -NH<sub>2</sub>); <sup>13</sup>C NMR (151 MHz, DMSO-d<sub>6</sub>) δ 162.24, 149.48, 134.84, 129.78, 117.61, 117.44, 112.80; HRMS: *m/z* calcd. for C<sub>7</sub>H<sub>7</sub>NO: 121.05, [M+H]<sup>+</sup> found: 122.06.

### *4-chloroaniline (2f)*

Yellow solid. Yield: 89 % (72 mg); mp 75-77 °C. <sup>1</sup>H NMR (600 MHz, CDCl<sub>3</sub>) δ 7.07 (d, *J* = 8.6 Hz, 2H, Ar-H), 6.56 (d, *J* = 8.6 Hz, 2H, Ar-H), 3.63 (s, 2H, -NH<sub>2</sub>); <sup>13</sup>C NMR (151 MHz, CDCl<sub>3</sub>) δ 145.08, 129.14, 123.06, 116.29; HRMS: *m/z* calcd. for C<sub>6</sub>H<sub>6</sub>ClN: 127.02, [M+H]<sup>+</sup> found: 128.03.

***benzene-1,2-diamine (2g)***

Light brown solid. Yield: 85 % (67 mg); mp 103-105 °C. <sup>1</sup>H NMR (600 MHz, CDCl<sub>3</sub>) δ 6.78 – 6.60 (m, 4H, Ar-H), 3.36 (s, 4H, -NH<sub>2</sub>); <sup>13</sup>C NMR (151 MHz, CDCl<sub>3</sub>) δ 134.79, 120.30, 116.79.

***4-aminobenzaldehyde (2h)***

Yellow solid. Yield: 88 % (70 mg); mp 73-75 °C. <sup>1</sup>H NMR (600 MHz, DMSO-d<sub>6</sub>) δ 8.46 (s, 1H, -CHO), 7.54 (d, *J* = 8.5 Hz, 2H, Ar-H), 6.66 (d, *J* = 8.5 Hz, 2H, Ar-H), 5.77 (s, 2H, -NH<sub>2</sub>); <sup>13</sup>C NMR (151 MHz, DMSO-d<sub>6</sub>) δ 160.25, 152.10, 130.20, 121.99, 113.97.

**3. NMR (<sup>1</sup>H & <sup>13</sup>C) data of 5-substituted-1*H*-tetrazoles derivatives**

***5-(4-chlorophenyl)-1H-tetrazole (5a)***

Light green solid. Yield: 91 %, (119 mg); mp 236-238 °C. <sup>1</sup>H NMR (δ ppm) (600 MHz, DMSO-d<sub>6</sub>) δ 8.06 (d, *J* = 7.7 Hz, 2H, Ar-H), 7.69 (d, *J* = 7.7 Hz, 2H, Ar-H); <sup>13</sup>C NMR (δ ppm) (151 MHz, DMSO-d<sub>6</sub>) 155.38, 136.37, 130.21, 129.18, 123.70; FTIR (cm<sup>-1</sup>): 3400, 2200, 1600, 1100, 730; HRMS: *m/z* calcd. for C<sub>7</sub>H<sub>5</sub>ClN<sub>4</sub>: 180.02, [M+H]<sup>+</sup> found: 181.02.

***5-(4-iodophenyl)-1H-tetrazole (5b)***

Light brown solid. Yield: 90 % (106 mg); mp 244-246 °C. <sup>1</sup>H NMR (δ ppm) (600 MHz, DMSO-d<sub>6</sub>) δ 8.00 (d, *J* = 7.7 Hz, 2H, Ar-H), 7.82 (d, *J* = 7.7 Hz, 2H, Ar-H); <sup>13</sup>C NMR (δ ppm) (151 MHz, DMSO-d<sub>6</sub>) δ 155.67138.77, 134.09, 129.17, 98.92; FTIR (cm<sup>-1</sup>): 3400, 2500, 1800, 1120, 621.

***5-(3-bromo-4-fluorophenyl)-1H-tetrazole (5c)***

Off-white solid. Yield: 91 % (110 mg); mp 158-160 °C. <sup>1</sup>H NMR (δ ppm) (600 MHz, DMSO-d<sub>6</sub>) δ 8.22 (s, 1H, Ar-H), 7.91 (d, *J* = 8.3 Hz, 1H, Ar-H), 7.59 (d, *J* = 8.3 Hz, 1H, Ar-H); <sup>13</sup>C NMR (δ ppm) (151 MHz, DMSO-d<sub>6</sub>) δ 144.04137.36, 133.44, 121.74, 117.77, 113.40, 108.75; FTIR (cm<sup>-1</sup>): 3400, 3050, 2150, 1600, 1110.

***5-(2,4-difluorophenyl)-1H-tetrazole (5d)***

Brown solid. Yield: 89 % (116 mg); mp 149-151 °C. <sup>1</sup>H NMR (δ ppm) (600 MHz, DMSO-d<sub>6</sub>) δ 7.88 (d, *J* = 8.4 Hz, 1H, Ar-H), 7.28 (s, 1H, Ar-H), 7.12 (d, *J* = 8.4 Hz, 1H, Ar-H); <sup>13</sup>C NMR (δ ppm) (151 MHz, DMSO-d<sub>6</sub>) δ 166.41164.72, 145.17, 135.73, 116.83, 111.13, 108.50; FTIR (cm<sup>-1</sup>): 3400, 3020, 2220, 1600, 820.

***5-(2-fluorophenyl)-1H-tetrazole (5e)***

Light brown solid. Yield: 90 % (122 mg); mp 129-131 °C. <sup>1</sup>H NMR (δ ppm) (600 MHz, DMSO-d<sub>6</sub>) δ 7.81 (d, *J* = 7.6 Hz, 1H, Ar-H), 7.75 (t, *J* = 7.8 Hz, 1H, Ar-H), 7.53 (d, *J* = 8.2 Hz, 1H, Ar-H), 7.33 (t, *J* = 7.5 Hz, 1H, Ar-H); <sup>13</sup>C NMR (δ ppm) (151 MHz, DMSO-d<sub>6</sub>) δ 143.38, 135.23, 134.35, 125.83, 120.29, 116.23, 103.00.

***5-(2,6-dichlorophenyl)-1H-tetrazole (5f)***

Cream solid. Yield: 90 % (113 mg); mp 118-120 °C. <sup>1</sup>H NMR (δ ppm) (600 MHz, DMSO-d<sub>6</sub>) δ 7.79 – 7.71 (m, 1H, Ar-H), 7.55 (d, *J* = 8.3 Hz, 1H, Ar-H), 7.51 (d, *J* = 8.1 Hz, 1H, Ar-H); <sup>13</sup>C NMR (δ ppm) (151 MHz, DMSO-d<sub>6</sub>) δ 145.99, 137.08, 135.85, 129.34, 126.08, 119.27, 116.01; FTIR (cm<sup>-1</sup>): 3400, 3040, 2200, 1600, 1350. HRMS: *m/z* calcd. for C<sub>7</sub>H<sub>4</sub>Cl<sub>2</sub>N<sub>4</sub>: 213.98, [M+H]<sup>+</sup> found: 214.91.

***5-phenyl-1H-tetrazole (5g)***

Snow white solid. Yield: 91 % (127 mg); mp 204-206 °C. <sup>1</sup>H NMR (δ ppm) (600 MHz, DMSO-d<sub>6</sub>) δ 8.05 (d, *J* = 7.0 Hz, 2H, Ar-H), 7.60 (t, *J* = 9.4 Hz, 3H, Ar-H); <sup>13</sup>C NMR (δ ppm) (151 MHz, DMSO-d<sub>6</sub>) δ 155.77131.72, 129.89, 127.43, 124.62; FTIR (cm<sup>-1</sup>): 3400, 2720, 2530, 1600, 1050, 740.

***5-(2-chloro-6-fluorophenyl)-1H-tetrazole (5h)***

Light brown solid. Yield: 90 % (114 mg); mp 148-150 °C. <sup>1</sup>H NMR (δ ppm) (600 MHz, DMSO-d<sub>6</sub>) δ 7.75 (t, *J* = 8.2 Hz, 1H, Ar-H), 7.55 (d, *J* = 8.3 Hz, 1H, Ar-H), 7.50 (d, *J* = 8.1 Hz, 1H, Ar-H); <sup>13</sup>C NMR (δ ppm) (151 MHz, DMSO-d<sub>6</sub>) δ 145.98137.08, 135.84, 126.07, 119.26, 116.00, 113.60; FTIR (cm<sup>-1</sup>): 3400, 3020, 1800, 1600, 710.



***5-(3-fluorophenyl)-1H-tetrazole (5i)***

Cream solid. Yield: 89 % (120 mg); mp 128-130 °C. <sup>1</sup>H NMR (δ ppm) (600 MHz, DMSO-d<sub>6</sub>) δ 7.90 (d, *J* = 7.6 Hz, 1H, Ar-H), 7.83 (d, *J* = 9.6 Hz, 1H, Ar-H), 7.69 – 7.42 (m, 2H, Ar-H); <sup>13</sup>C NMR (δ ppm) (151 MHz, DMSO-d<sub>6</sub>) δ 163.60161.98, 155.64, 132.24, 132.19, 127.31, 127.26; FTIR (cm<sup>-1</sup>): 3400, 3020, 2110, 1600, 1120, 751.

***2-chloro-4-(1H-tetrazol-5-yl)pyridine (5j)***

Off-white solid. Yield: 87 % (114 mg); mp 183-185 °C. <sup>1</sup>H NMR (δ ppm) (600 MHz, DMSO-d<sub>6</sub>) δ 8.66 (d, *J* = 4.6 Hz, 1H, Ar-H), 8.06 (s, 1H, Ar-H), 8.01 (d, *J* = 4.9 Hz, 1H, Ar-H); <sup>13</sup>C NMR (δ ppm) (151 MHz, DMSO-d<sub>6</sub>) δ 155.25151.87, 151.78, 136.12, 121.71, 120.76; FTIR (cm<sup>-1</sup>): 3420, 3030, 1850, 1610.

***5-(4-bromophenyl)-1H-tetrazole (5k)***

Grey solid. Yield: 88 % (108 mg); mp 237-239 °C. <sup>1</sup>H NMR (δ ppm) (600 MHz, DMSO-d<sub>6</sub>) δ 7.99 (d, *J* = 7.8 Hz, 2H, Ar-H), 7.84 (d, *J* = 7.7 Hz, 2H, Ar-H); <sup>13</sup>C NMR (δ ppm) (151 MHz, DMSO-d<sub>6</sub>) δ 134.60, 133.12, 132.97, 129.36, 125.18, 124.04; FTIR (cm<sup>-1</sup>): 3400, 3120, 2200, 1600, 1020.

***2-bromo-4-(1H-tetrazol-5-yl)phenol (5l)***

Yellow solid. Yield: 85 % (103 mg); mp 200-202 °C. <sup>1</sup>H NMR (δ ppm) (600 MHz, DMSO-d<sub>6</sub>) δ 11.08 (s, 1H, Ar-H), 8.16 (s, 1H, Ar-H), 7.88 (d, *J* = 8.4 Hz, 1H, Ar-H), 7.14 (d, *J* = 8.4 Hz, 1H, Ar-H); <sup>13</sup>C NMR (δ ppm) (151 MHz, DMSO-d<sub>6</sub>) δ 159.05, 157.18, 133.85, 131.98, 128.32, 117.44, 110.42; FTIR (cm<sup>-1</sup>): 3450, 3020, 2615, 1700, 1600, 1100. HRMS: *m/z* calcd. for C<sub>7</sub>H<sub>5</sub>BrN<sub>4</sub>O: 239.96, [M+H]<sup>+</sup> found: 240.97.

***5-(p-tolyl)-1H-tetrazole (5m)***

White solid. Yield: 90 % (122 mg); mp 240-242 °C. <sup>1</sup>H NMR (δ ppm) (600 MHz, DMSO-d<sub>6</sub>) δ 7.93 (d, *J* = 7.6 Hz, 2H, Ar-H), 7.42 (d, *J* = 7.7 Hz, 2H, Ar-H), 2.39 (s, 3H, -CH<sub>3</sub>); <sup>13</sup>C NMR (δ ppm) (151 MHz, DMSO-d<sub>6</sub>) δ 141.71, 132.56, 130.42, 127.36, 121.73, 21.50; FTIR (cm<sup>-1</sup>): 3400, 3020, 1900, 1600, 1450, 760.

***2-chloro-3-(1H-tetrazol-5-yl)pyridine (5n)***

Light green solid. Yield: 91 % (119 mg); mp 210-212 °C.  $^1\text{H}$  NMR ( $\delta$  ppm) (600 MHz, DMSO- $d_6$ )  $\delta$  9.65 (d,  $J = 6.9$  Hz, 1H, Ar-H), 8.61 (d,  $J = 7.1$  Hz, 1H, Ar-H), 7.62 (t,  $J = 7.0$  Hz, 1H, Ar-H);  $^{13}\text{C}$  NMR ( $\delta$  ppm) (151 MHz, DMSO- $d_6$ )  $\delta$  147.79, 141.70, 131.93, 117.41, 114.21, 100.02; FTIR ( $\text{cm}^{-1}$ ): 3400, 3050, 2650, 1600, 1200, 740.

***4-(1H-tetrazol-5-yl)benzaldehyde (5o)***

Green solid. Yield: 89 % (118 mg); mp 215-217 °C.  $^1\text{H}$  NMR ( $\delta$  ppm) (600 MHz, DMSO- $d_6$ )  $\delta$  10.09 (s, 1H, -CHO), 8.25 (d,  $J = 7.1$  Hz, 2H, Ar-H), 8.12 (d,  $J = 7.2$  Hz, 2H, Ar-H);  $^{13}\text{C}$  NMR ( $\delta$  ppm) (151 MHz, DMSO- $d_6$ )  $\delta$  193.13, 155.96, 138.06, 130.82, 130.72, 128.22, 128.06; FTIR ( $\text{cm}^{-1}$ ): 3400, 3020, 2650, 1600, 1190. HRMS:  $m/z$  calcd. for  $\text{C}_8\text{H}_6\text{N}_4\text{O}$ : 174.05,  $[\text{M}+\text{H}]^+$  found: 175.06.

#### 4. Physical data of synthesized amine derivatives.

##### $^1\text{H}$ NMR of 2-chloroaniline (2a)

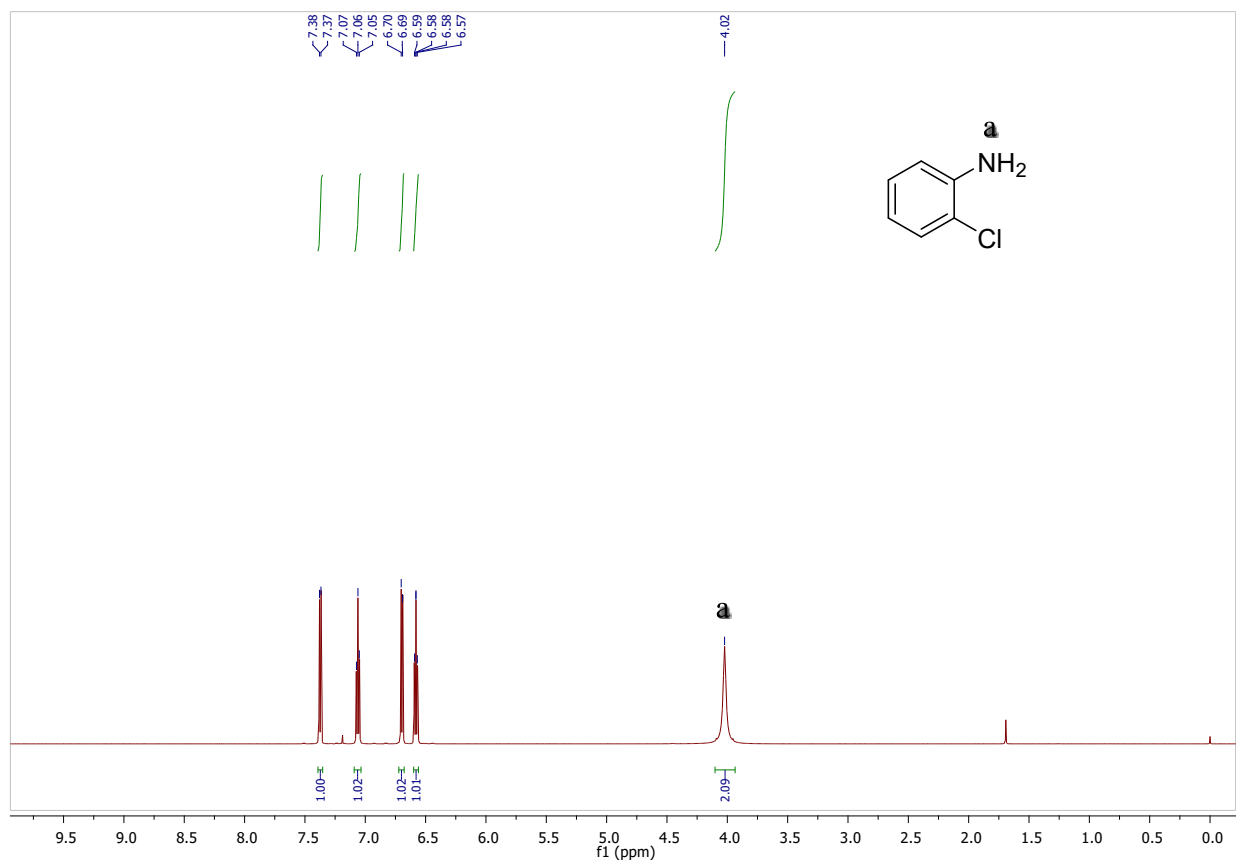

# <sup>13</sup>C NMR of 2-chloroaniline (2a)

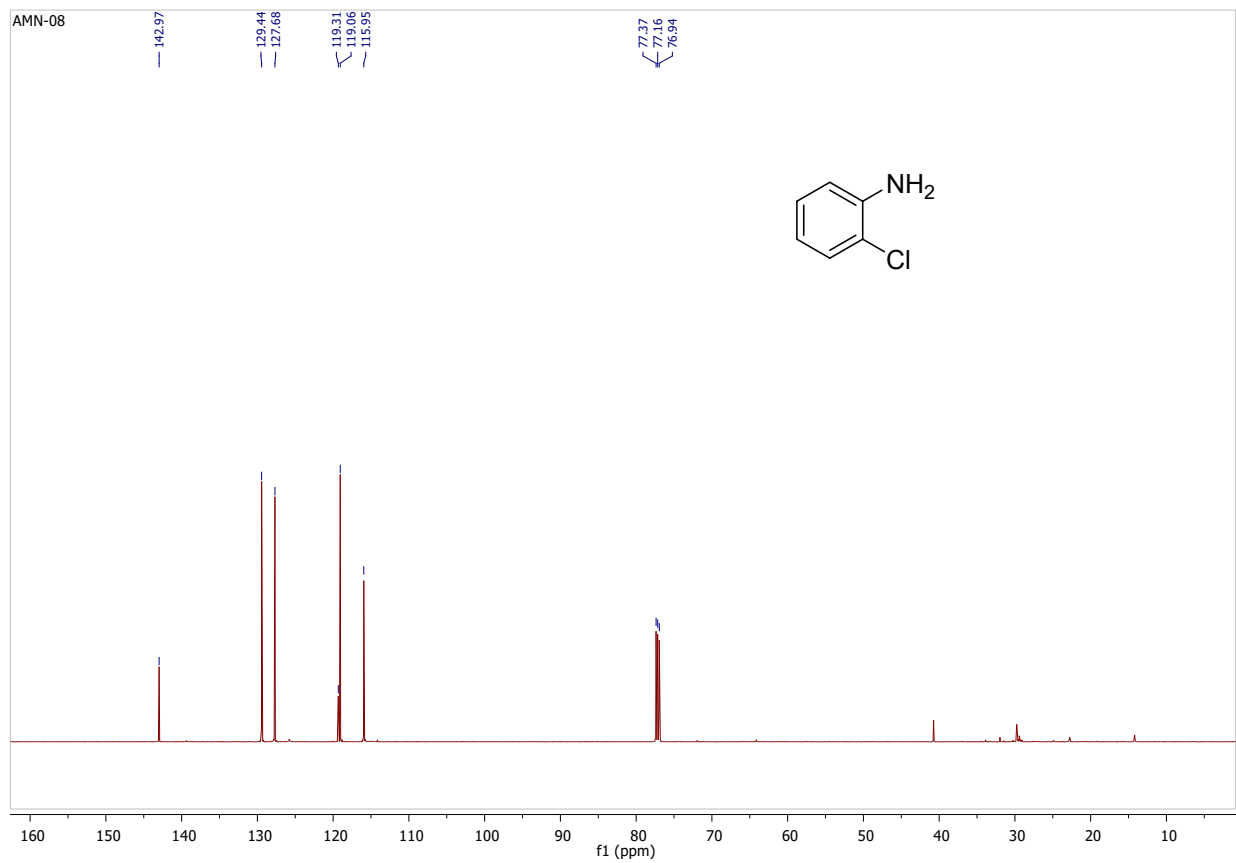

# <sup>1</sup>H NMR of 4-bromoaniline (2b)

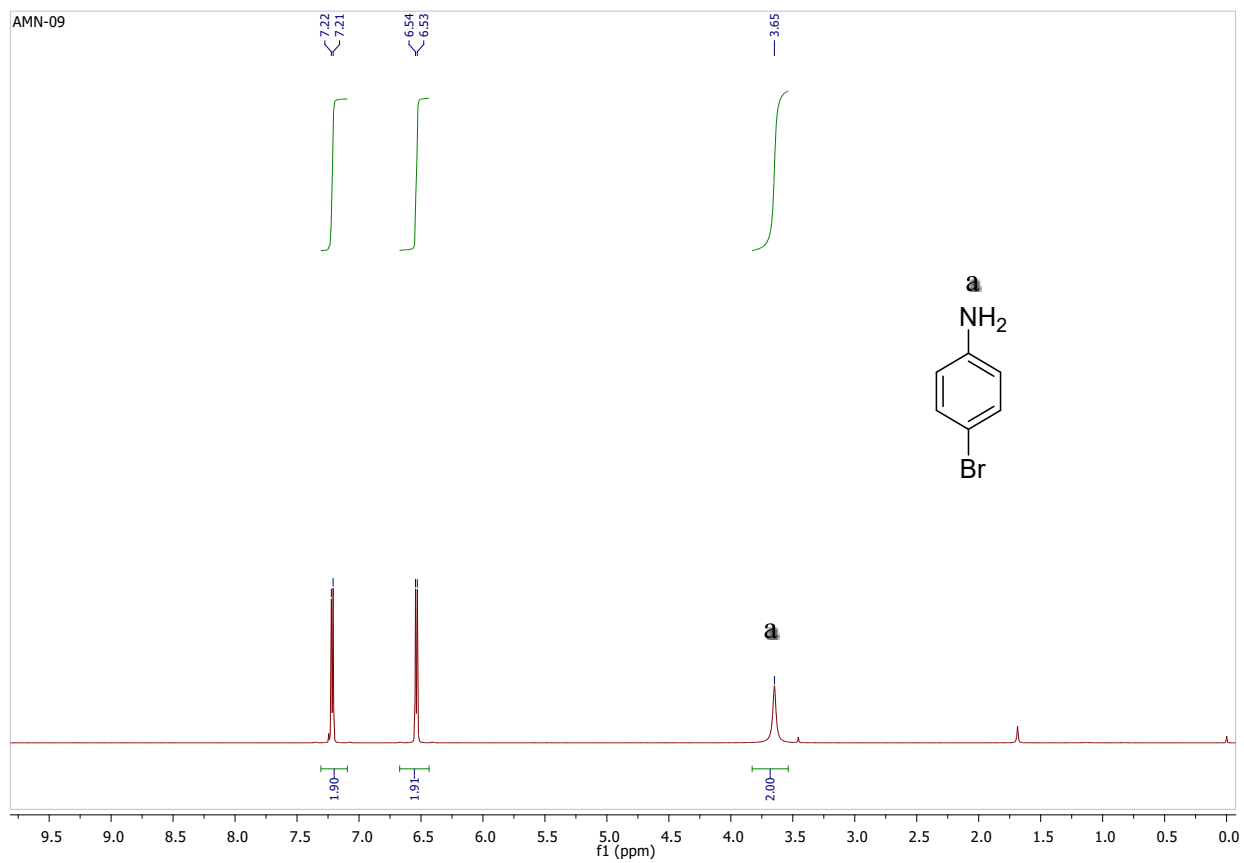

# <sup>13</sup>C NMR of 4-bromoaniline (2b)

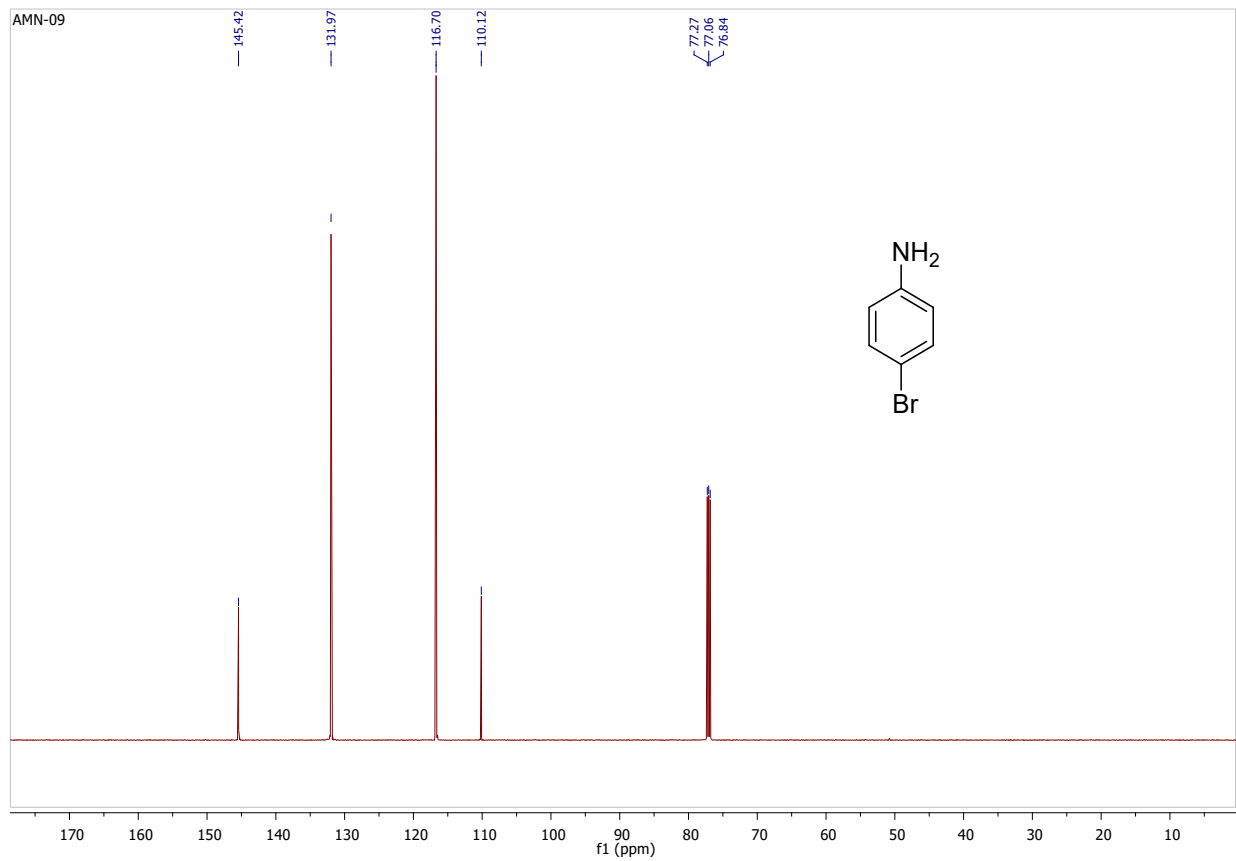

# <sup>1</sup>H NMR of 3-chloroaniline (2c)

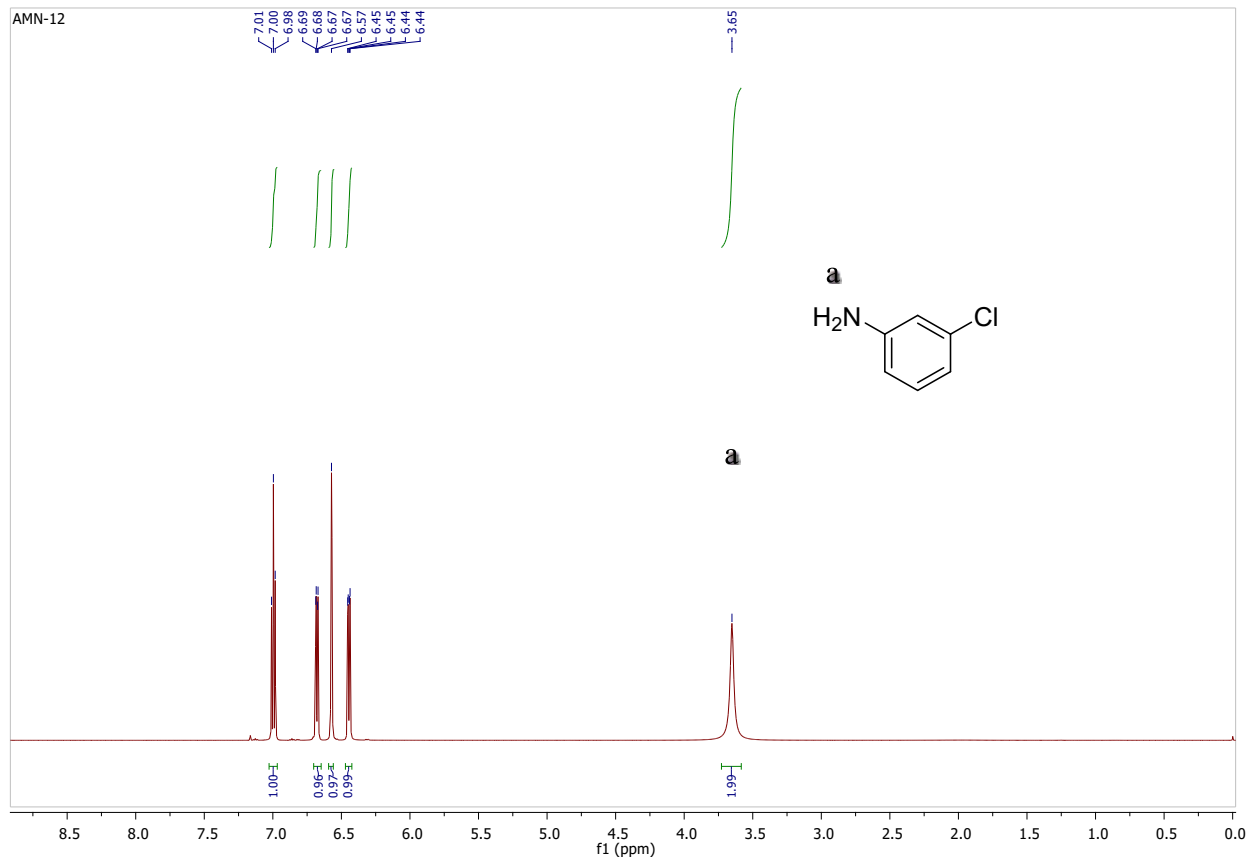

# <sup>13</sup>C NMR of 3-chloroaniline (2c)

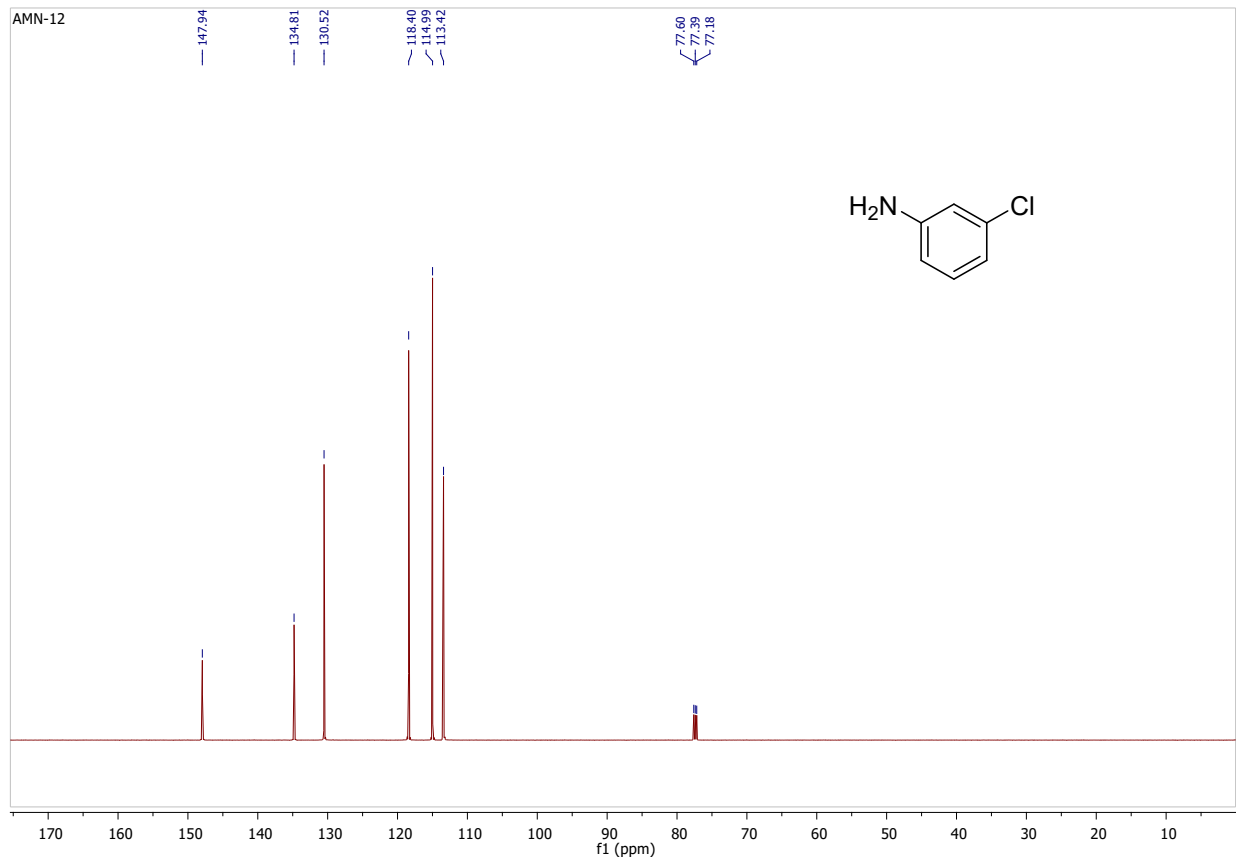



# <sup>1</sup>H NMR of 4-aminobenzoic acid (2d)

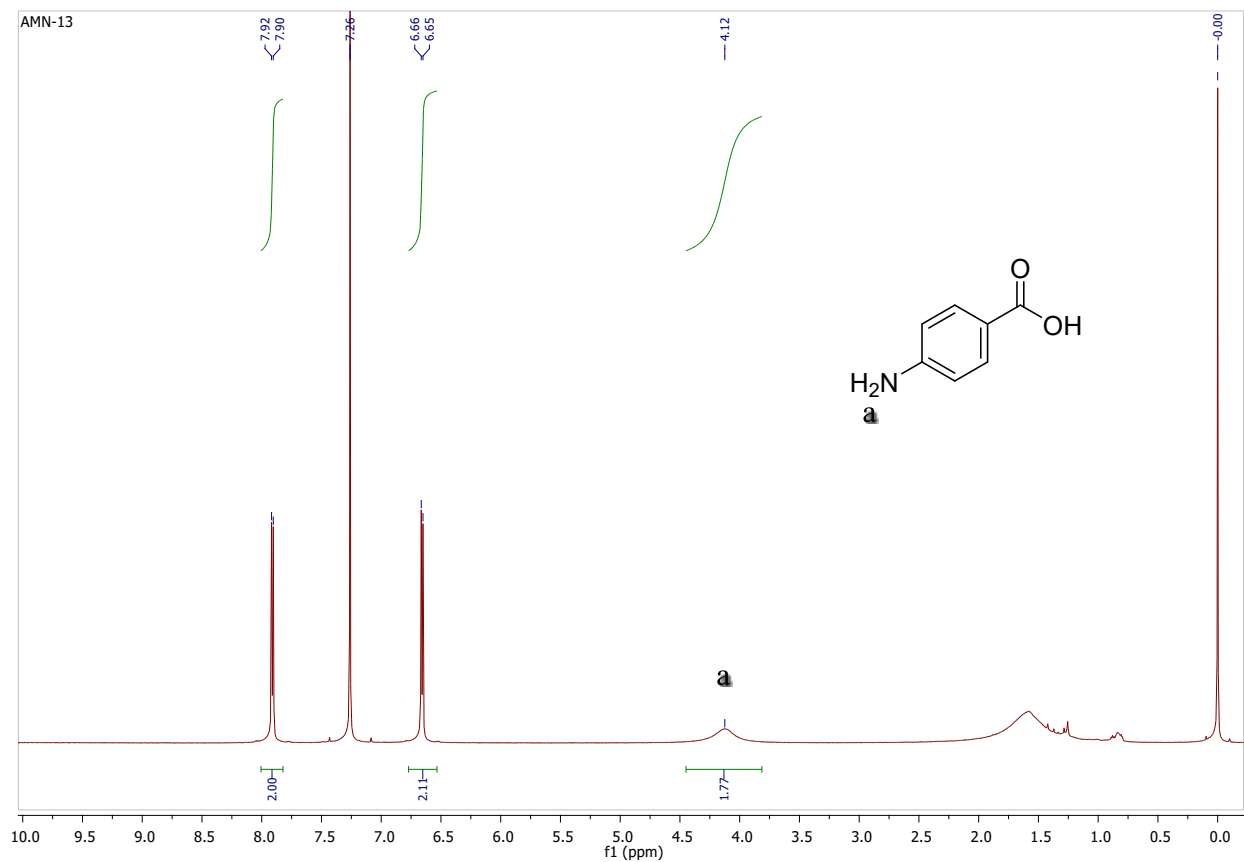

# <sup>13</sup>C NMR of 4-aminobenzoic acid (2d)

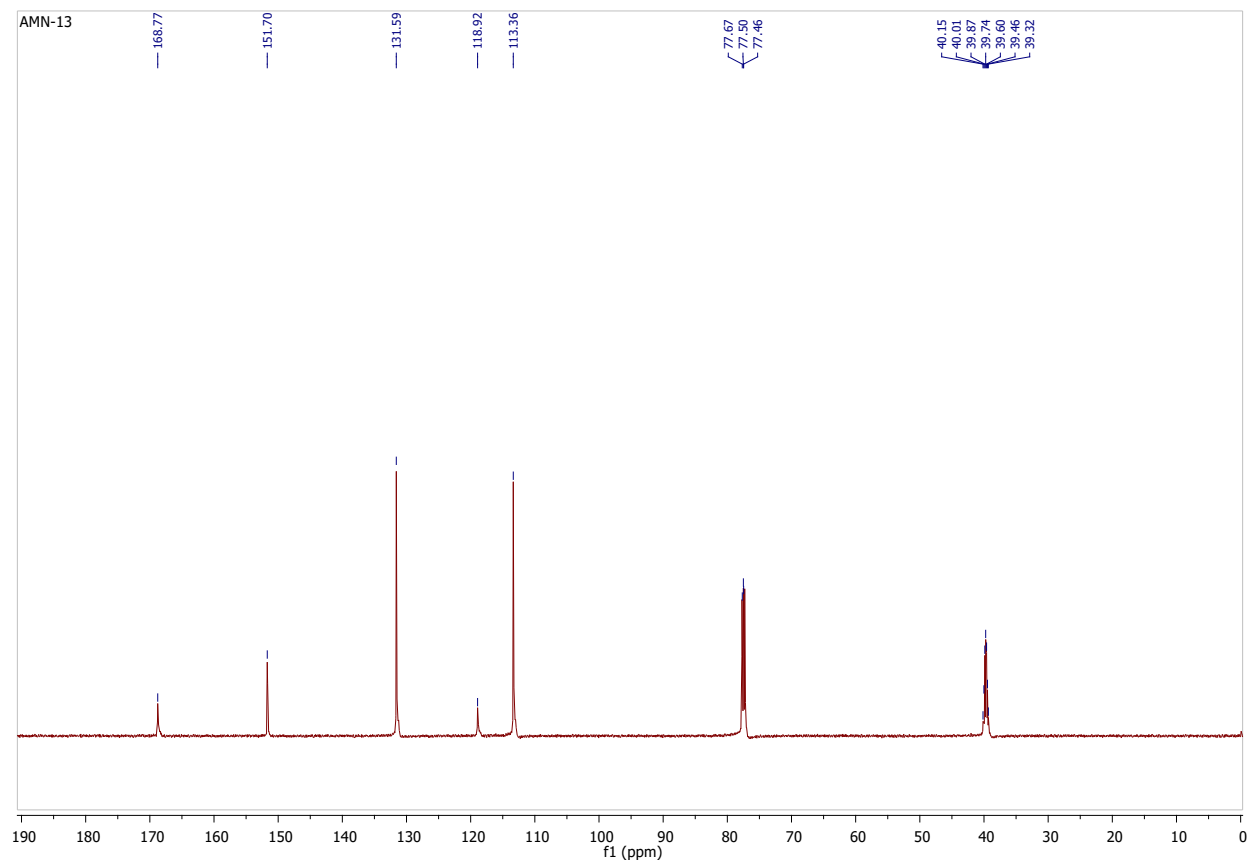

# <sup>1</sup>H NMR of 3-aminobenzaldehyde (2e)

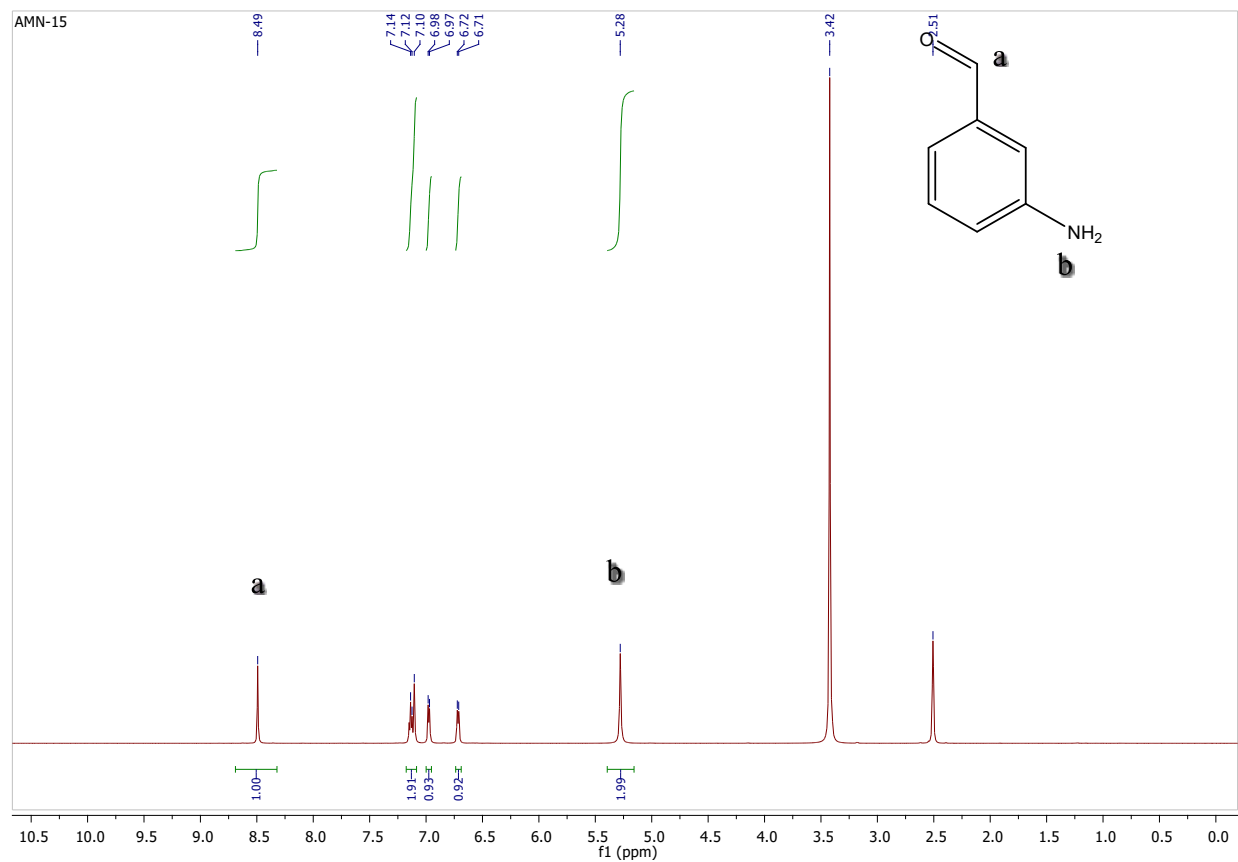

# <sup>13</sup>C NMR of 3-aminobenzaldehyde (2e)

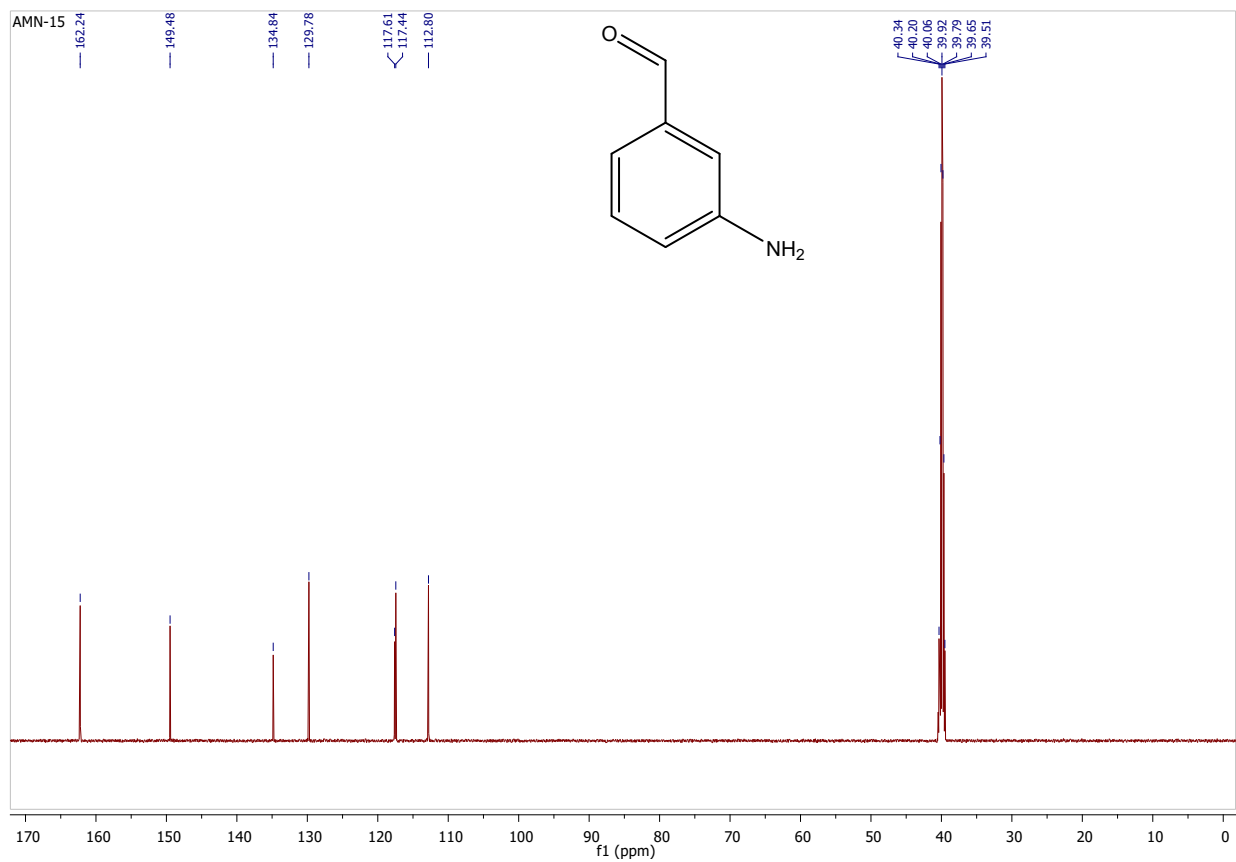

## HRMS of 3-aminobenzaldehyde (2e)

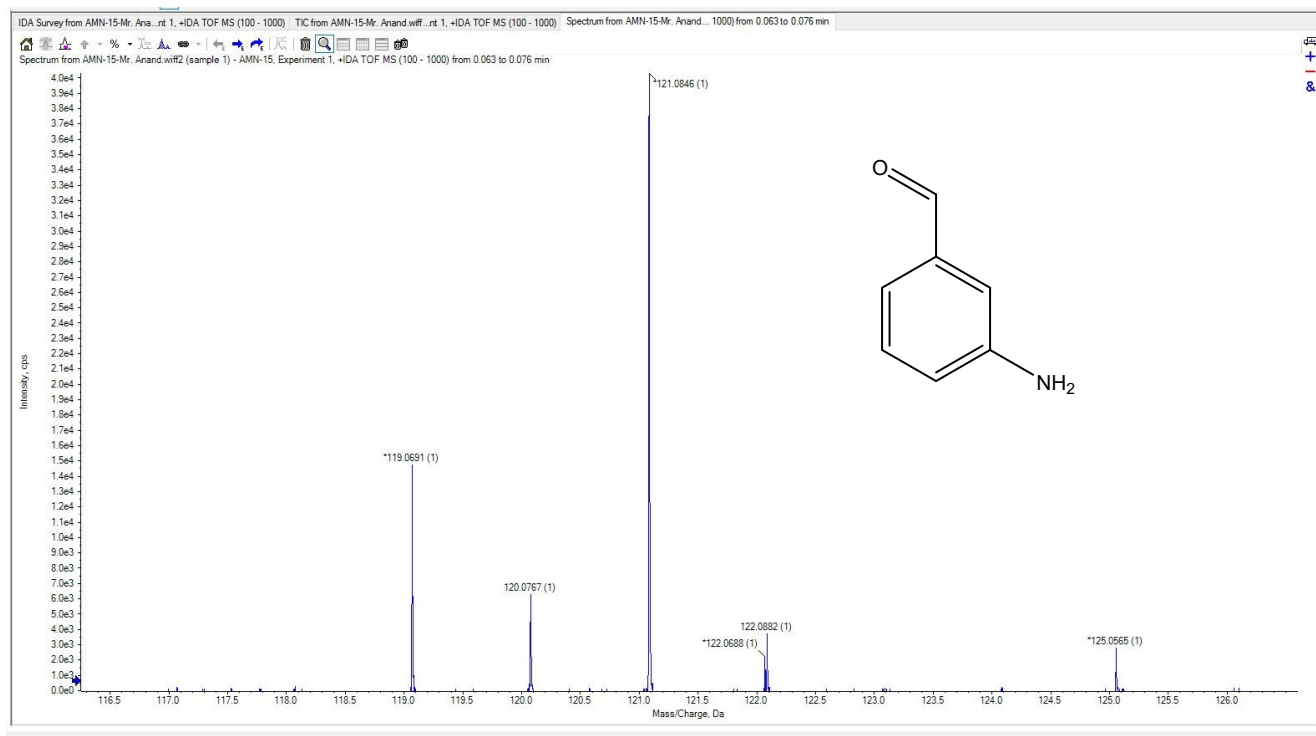

# <sup>1</sup>H NMR of 4-chloroaniline (2f)

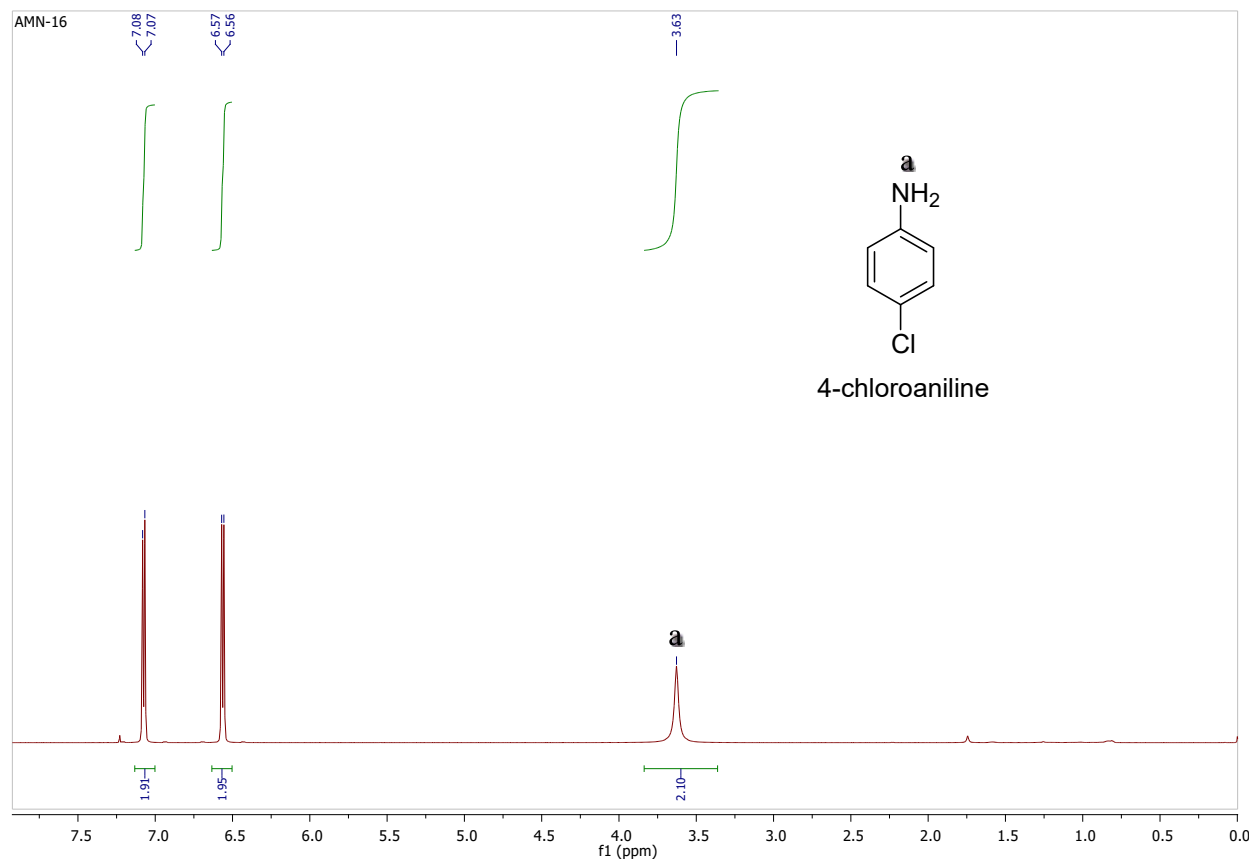

# <sup>13</sup>C NMR of 4-chloroaniline (2f)

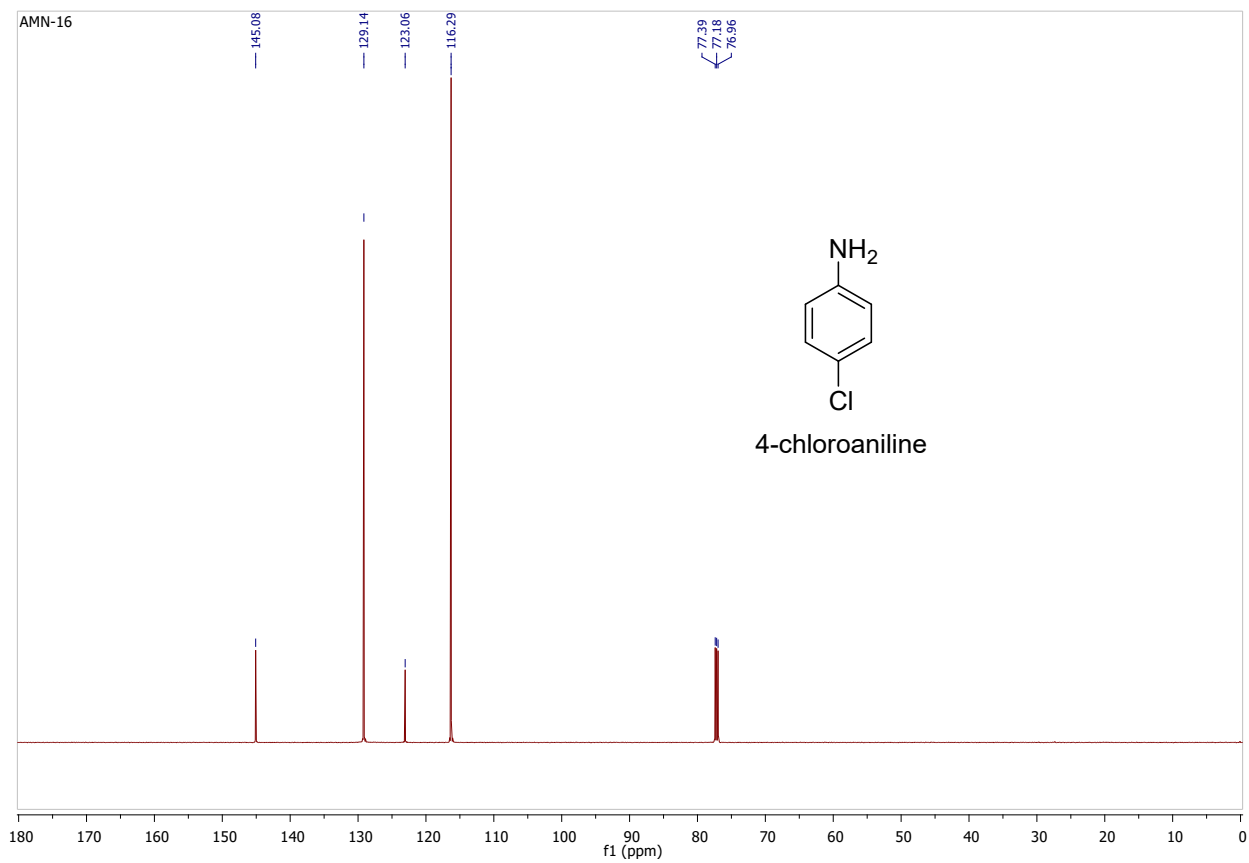

## HRMS of 4-chloroaniline (2f)

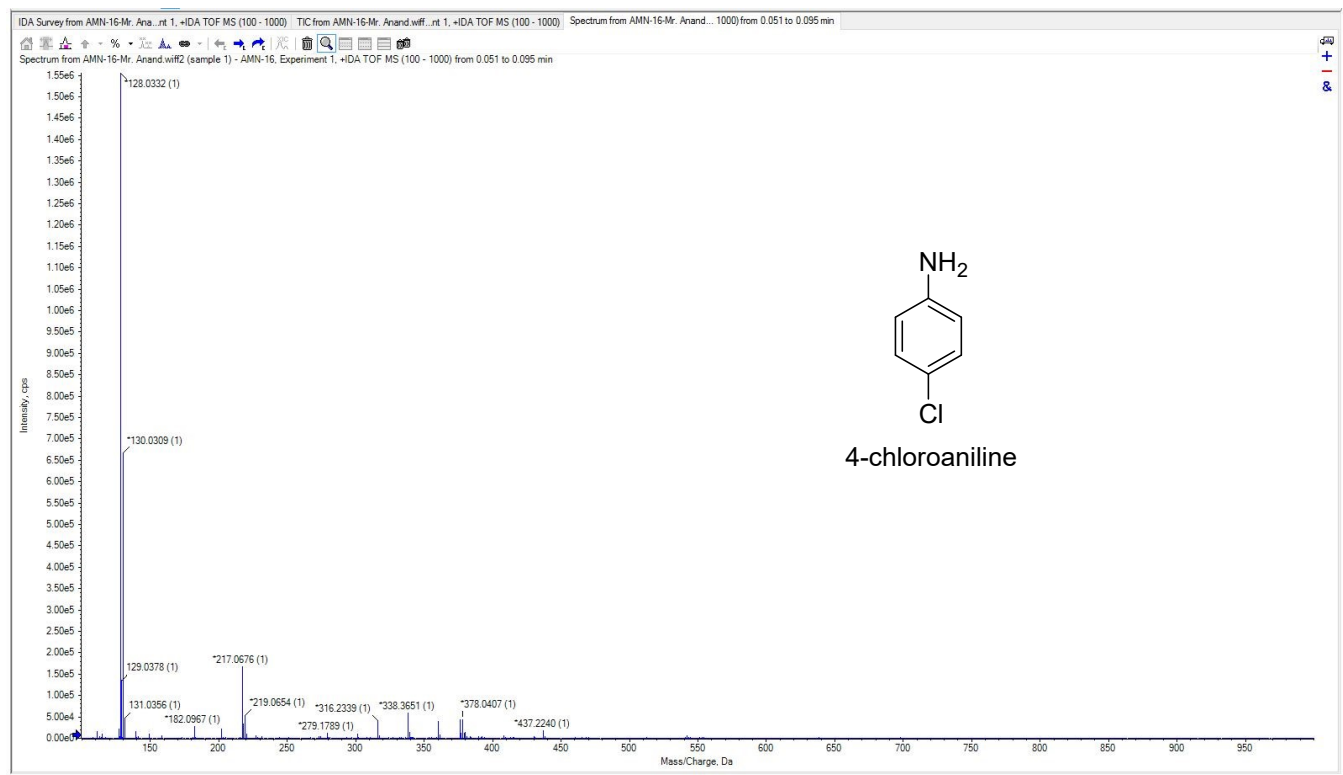



# $^1\text{H}$ NMR of benzene-1,2-diamine (2g)

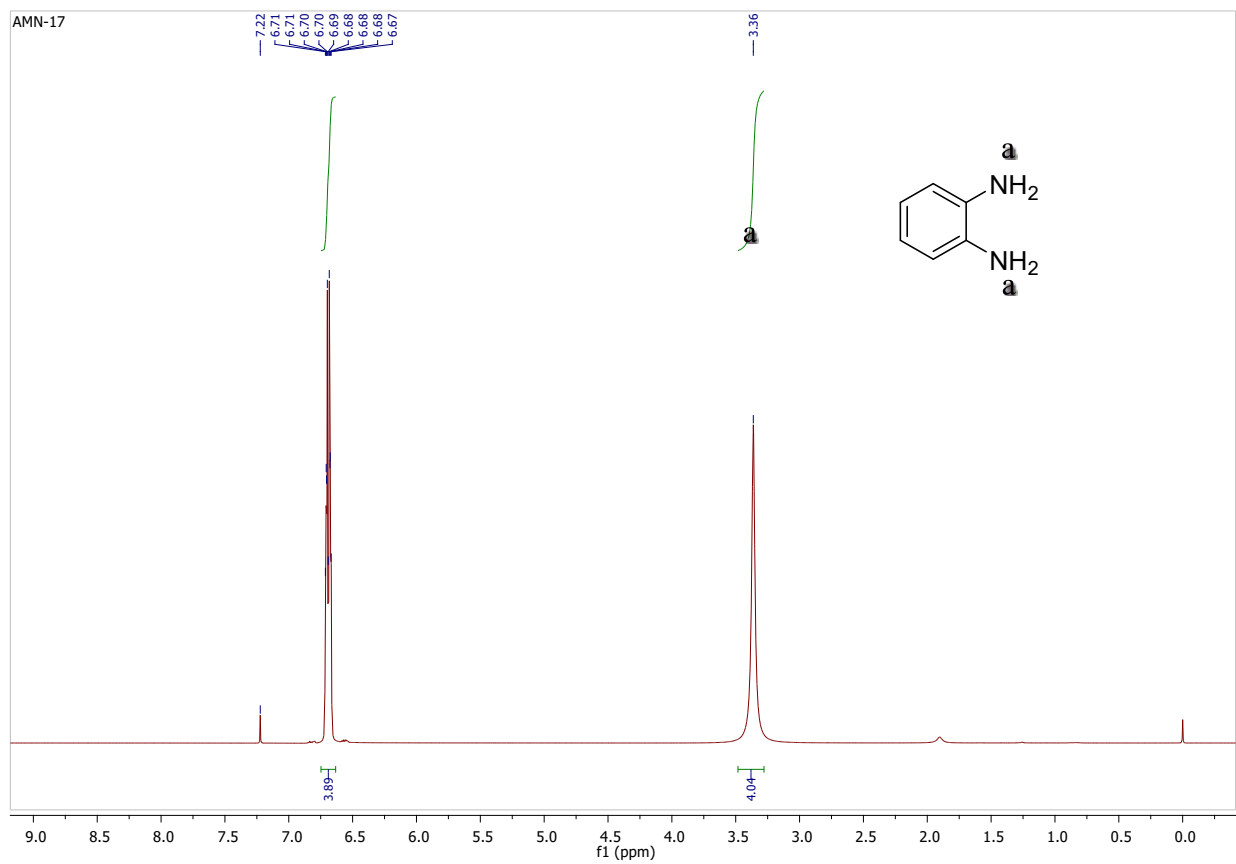

# <sup>13</sup>C NMR of benzene-1,2-diamine (2g)

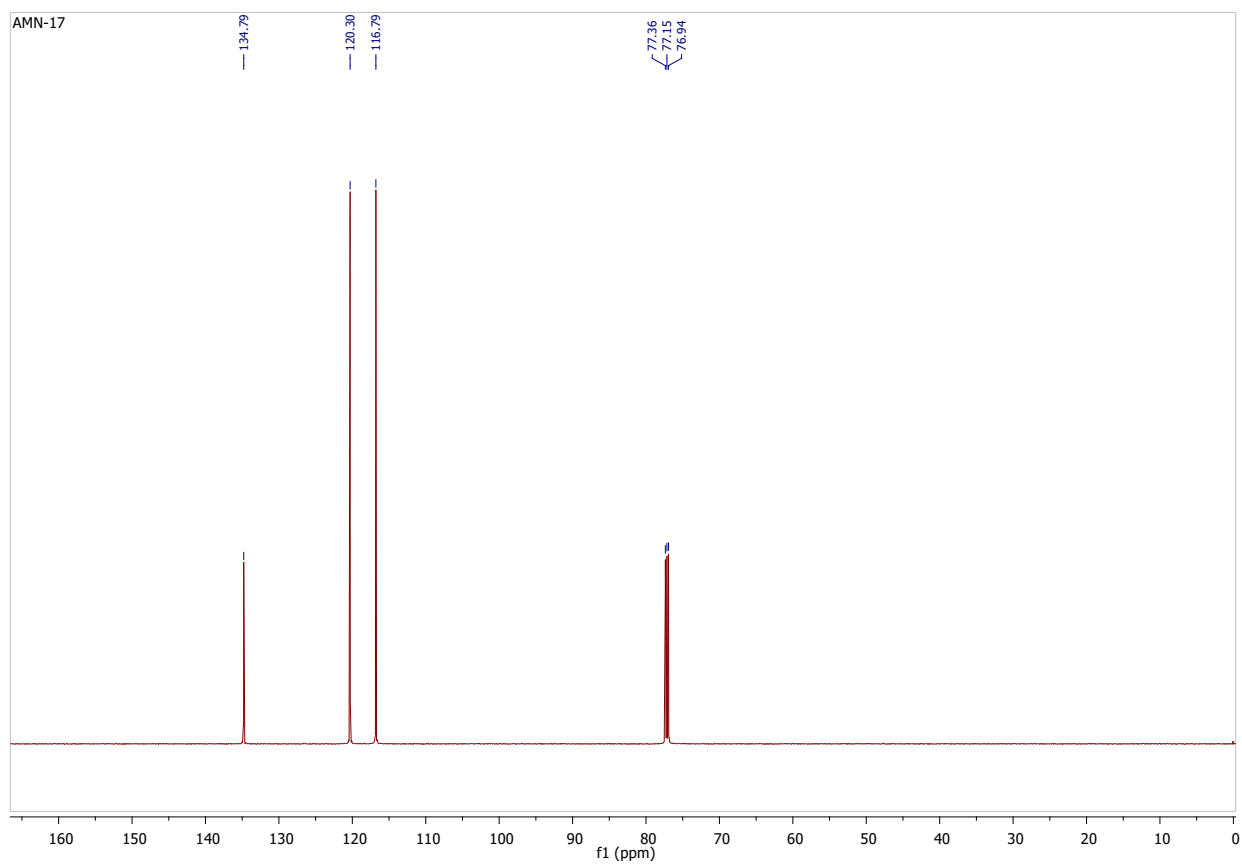

# <sup>1</sup>H NMR of 4-aminobenzaldehyde (2h)

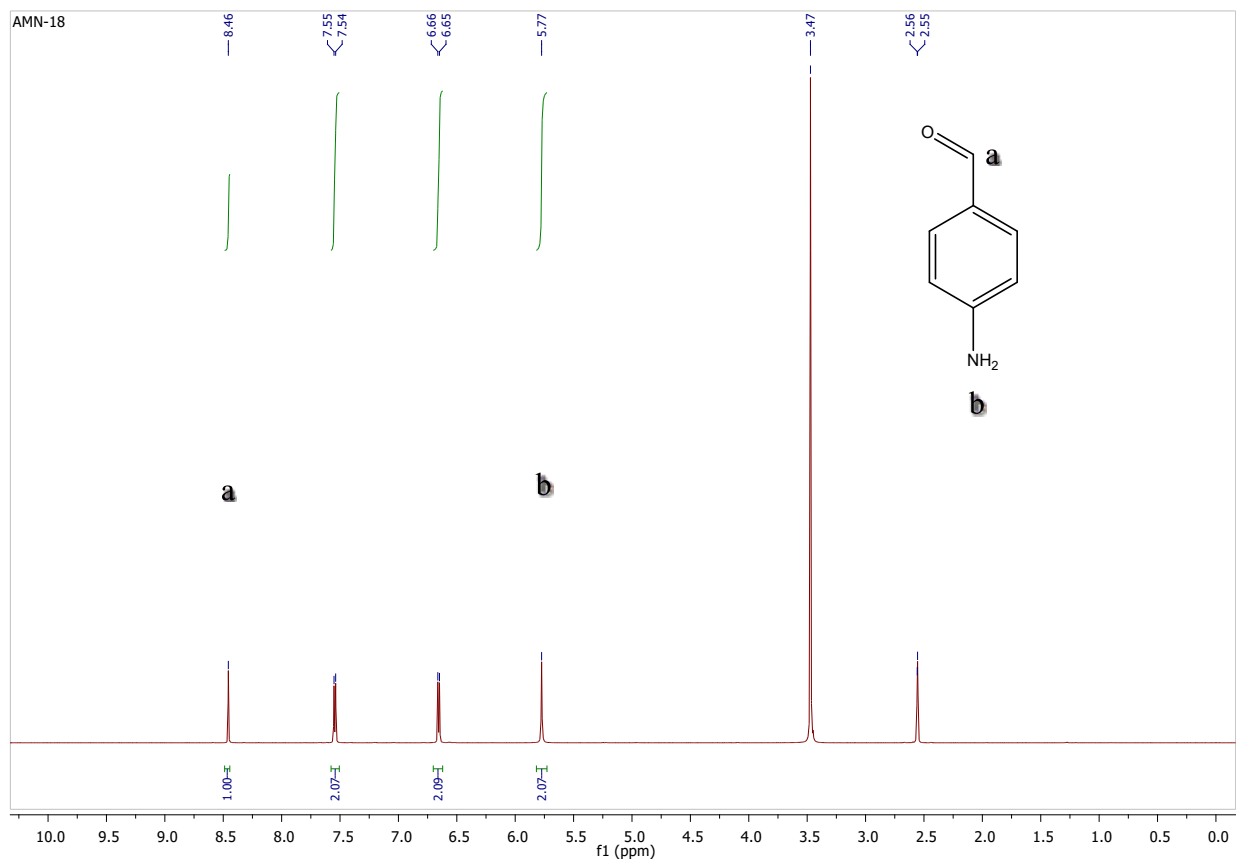

# <sup>13</sup>C NMR of 4-aminobenzaldehyde (2h)

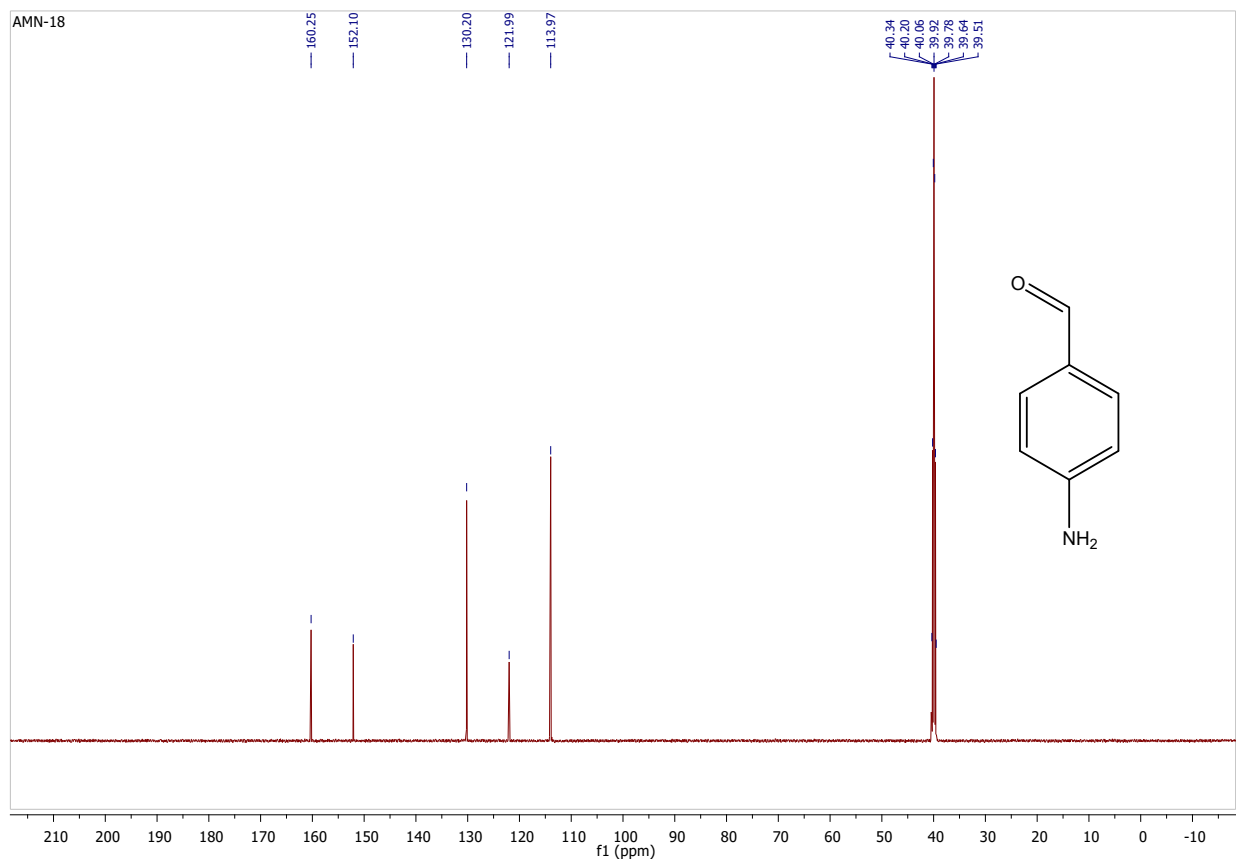

## 5. Physical data of synthesized 5-substituted-1H-tetrazole derivatives.

### <sup>1</sup>H NMR of 5-(4-chlorophenyl)-1H-tetrazole (5a)

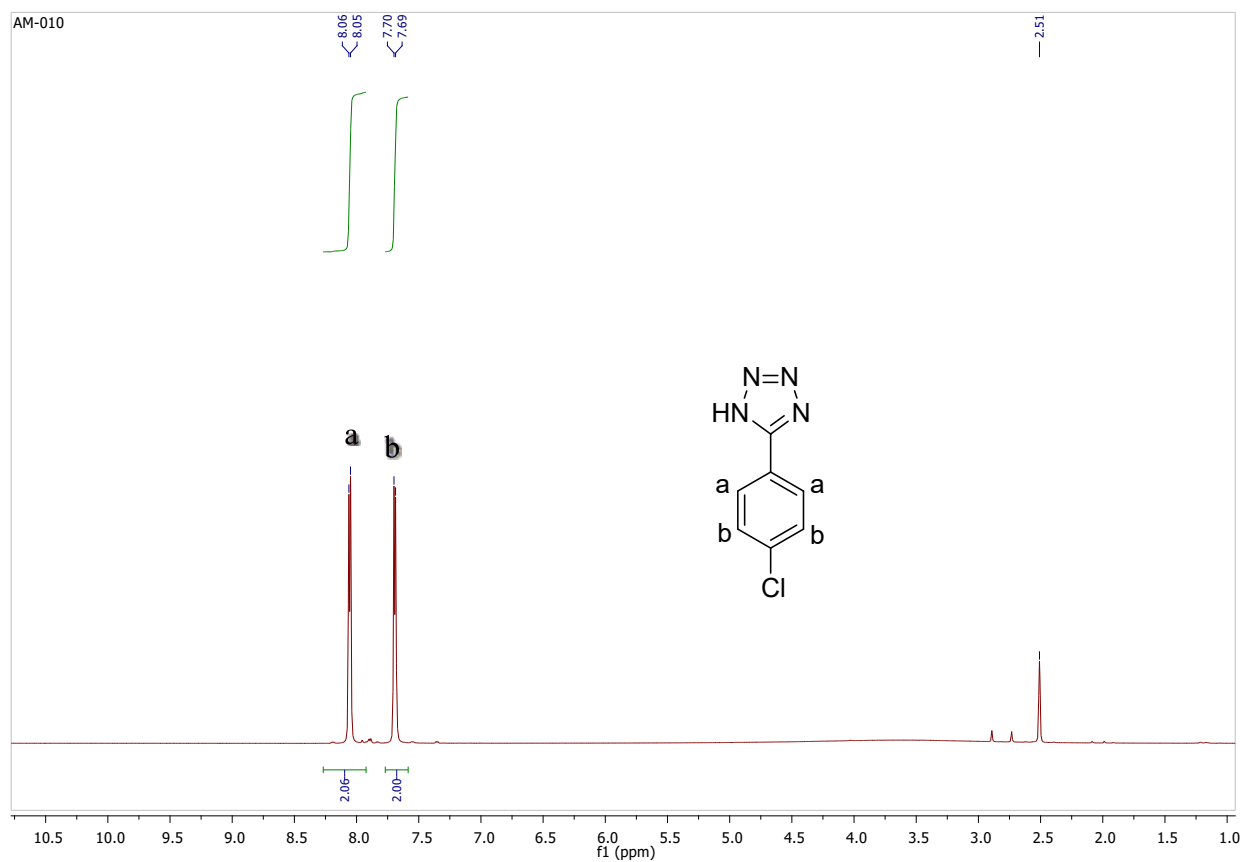

# <sup>13</sup>C NMR of 5-(4-chlorophenyl)-1H-tetrazole (5a)

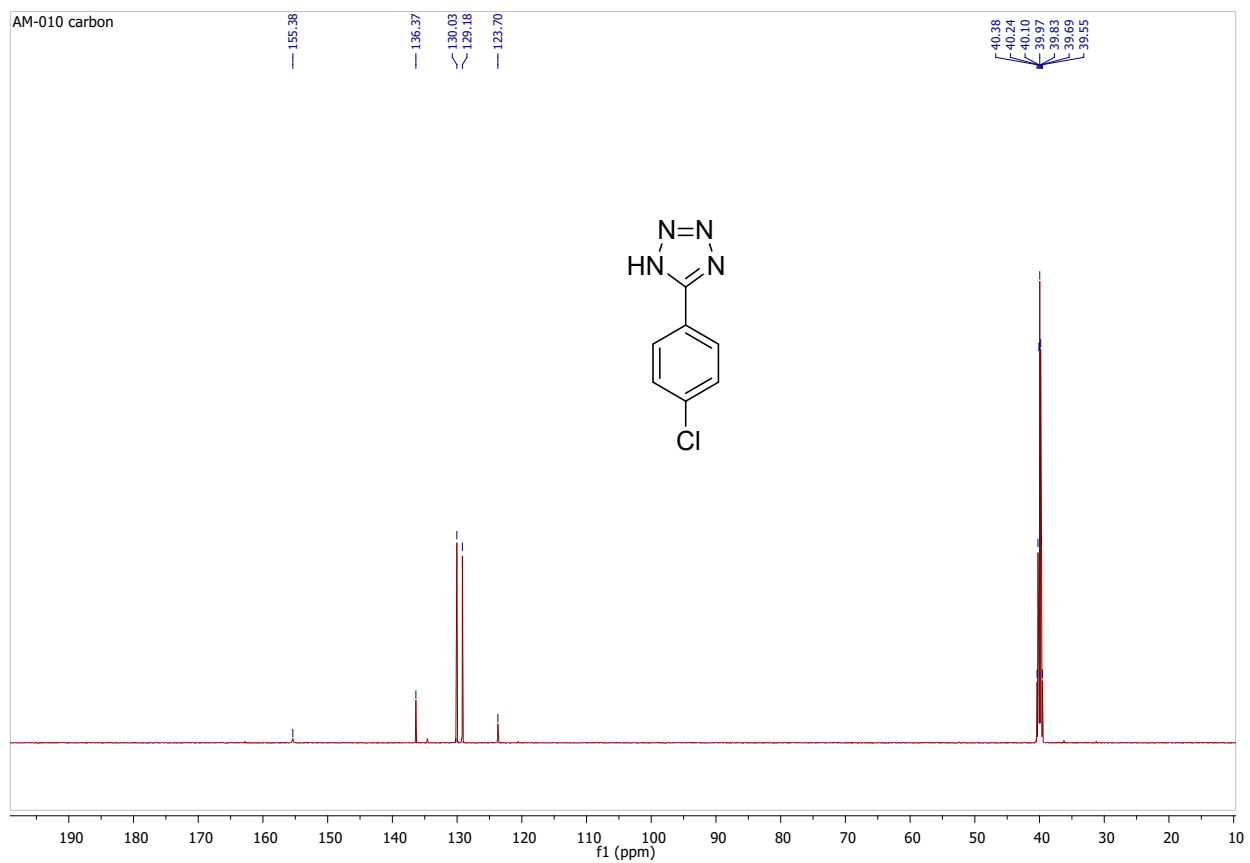

## HRMS of 5-(4-chlorophenyl)-1H-tetrazole (5a)

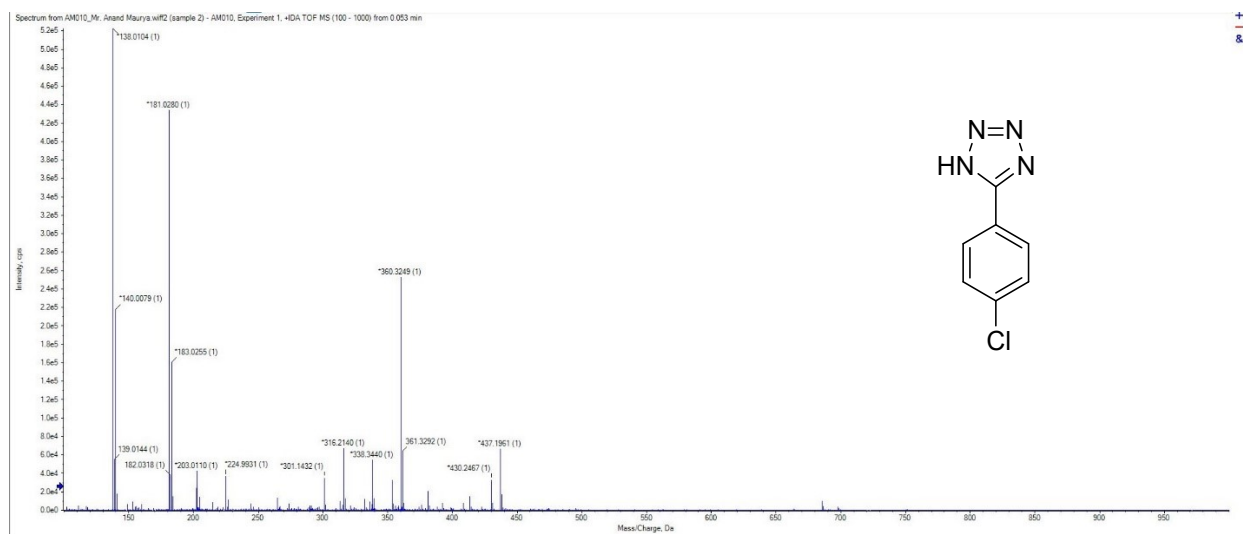

**FT-IR of 5-(4-chlorophenyl)-1H-tetrazole (5a)**

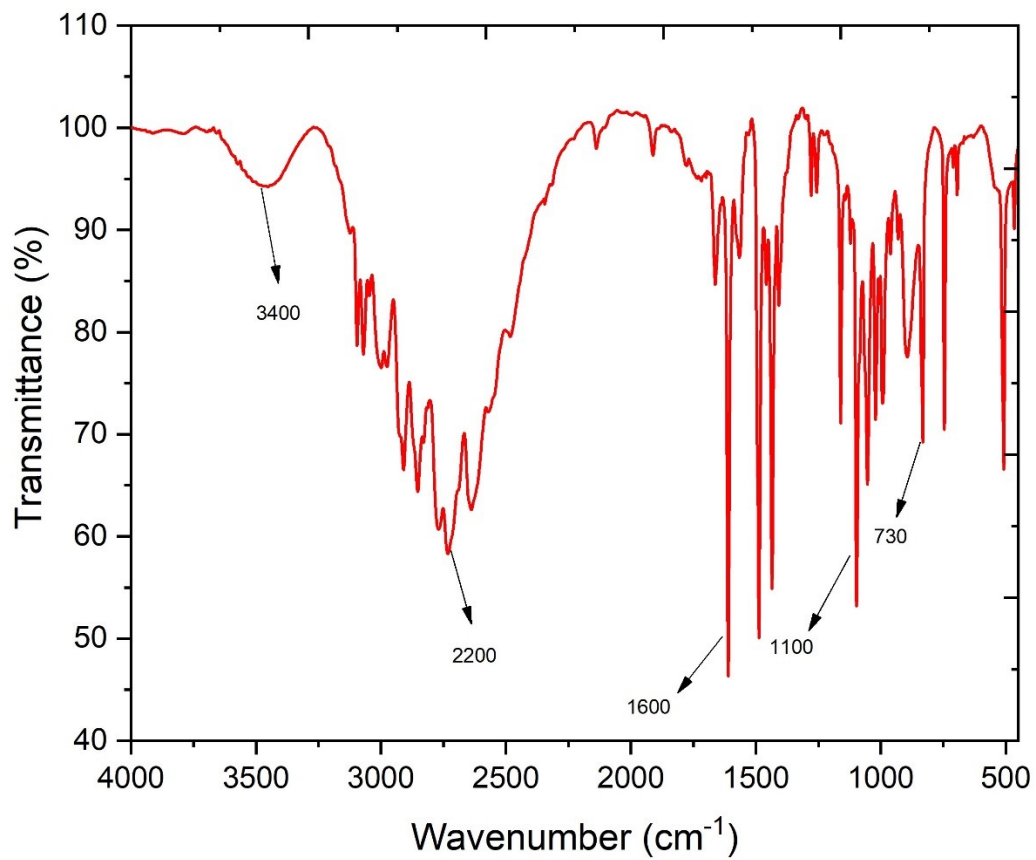



**<sup>1</sup>H NMR of 5-(4-iodophenyl)-1H-tetrazole (5b)**

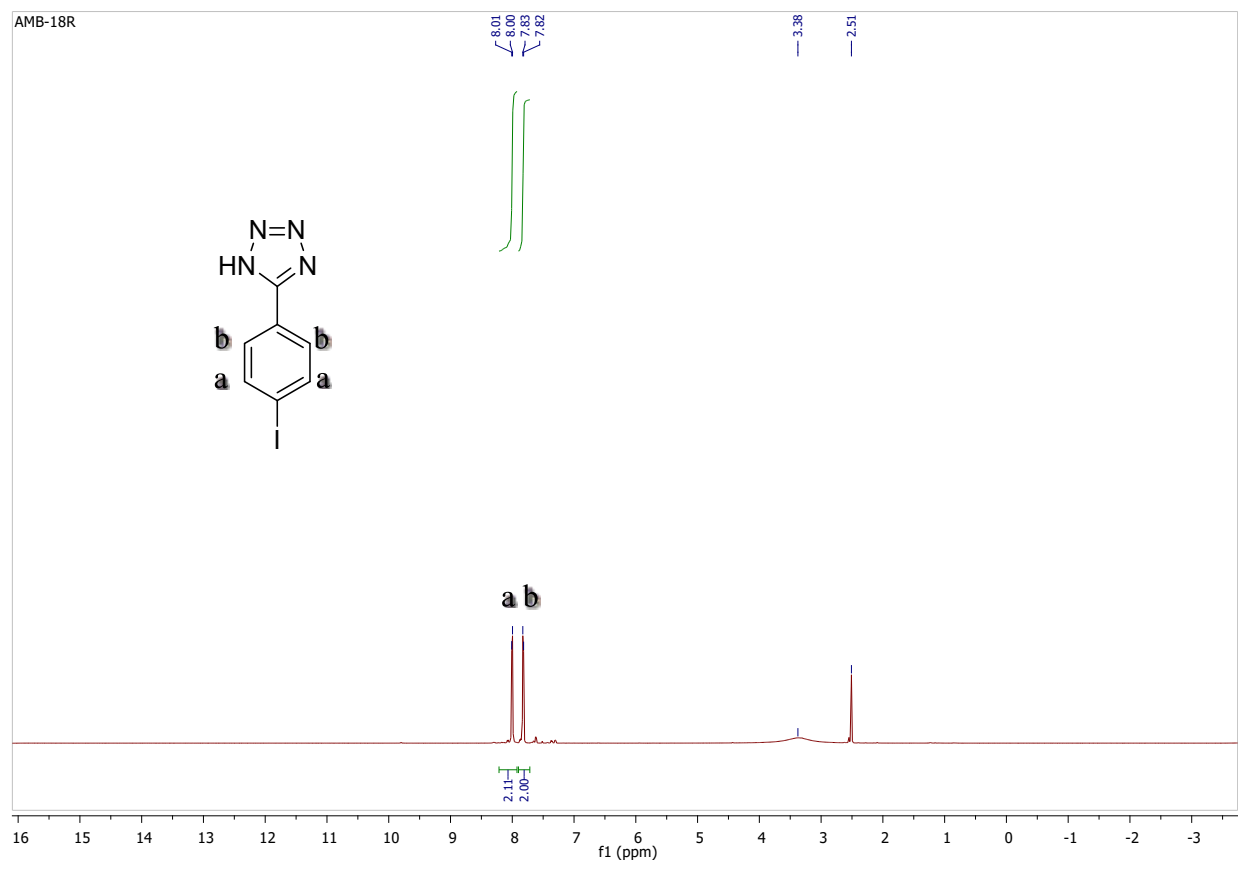

# <sup>13</sup>C NMR of 5-(4-iodophenyl)-1H-tetrazole (5b)

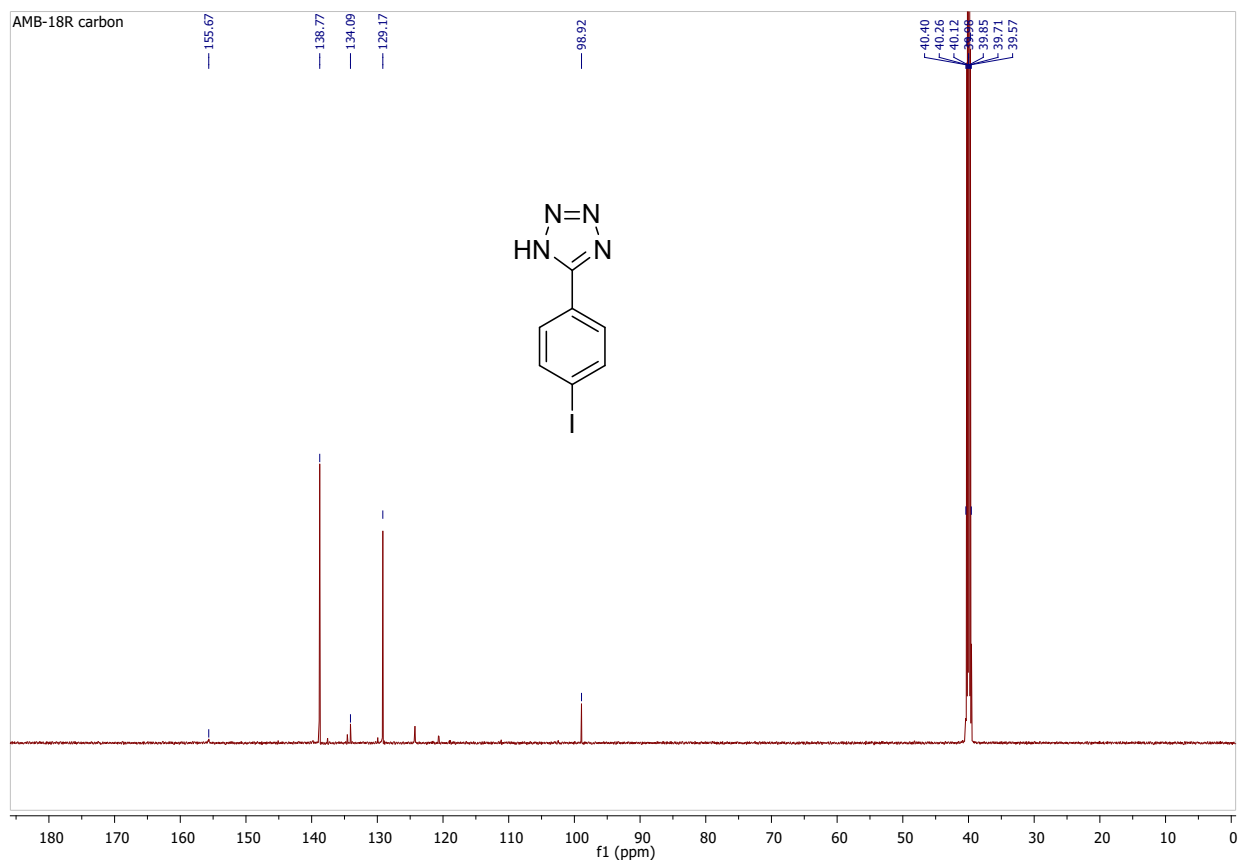

**FT-IR of 5-(4-iodophenyl)-1H-tetrazole (5b)**

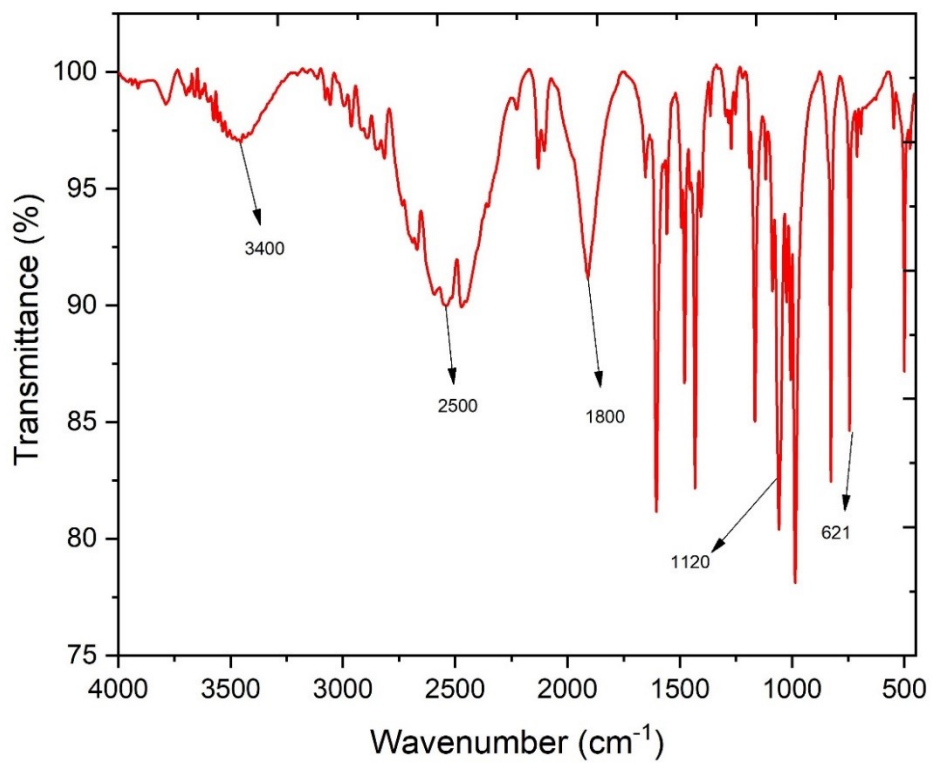

# <sup>1</sup>H NMR of 5-(3-bromo-4-fluorophenyl)-1H-tetrazole (5c)

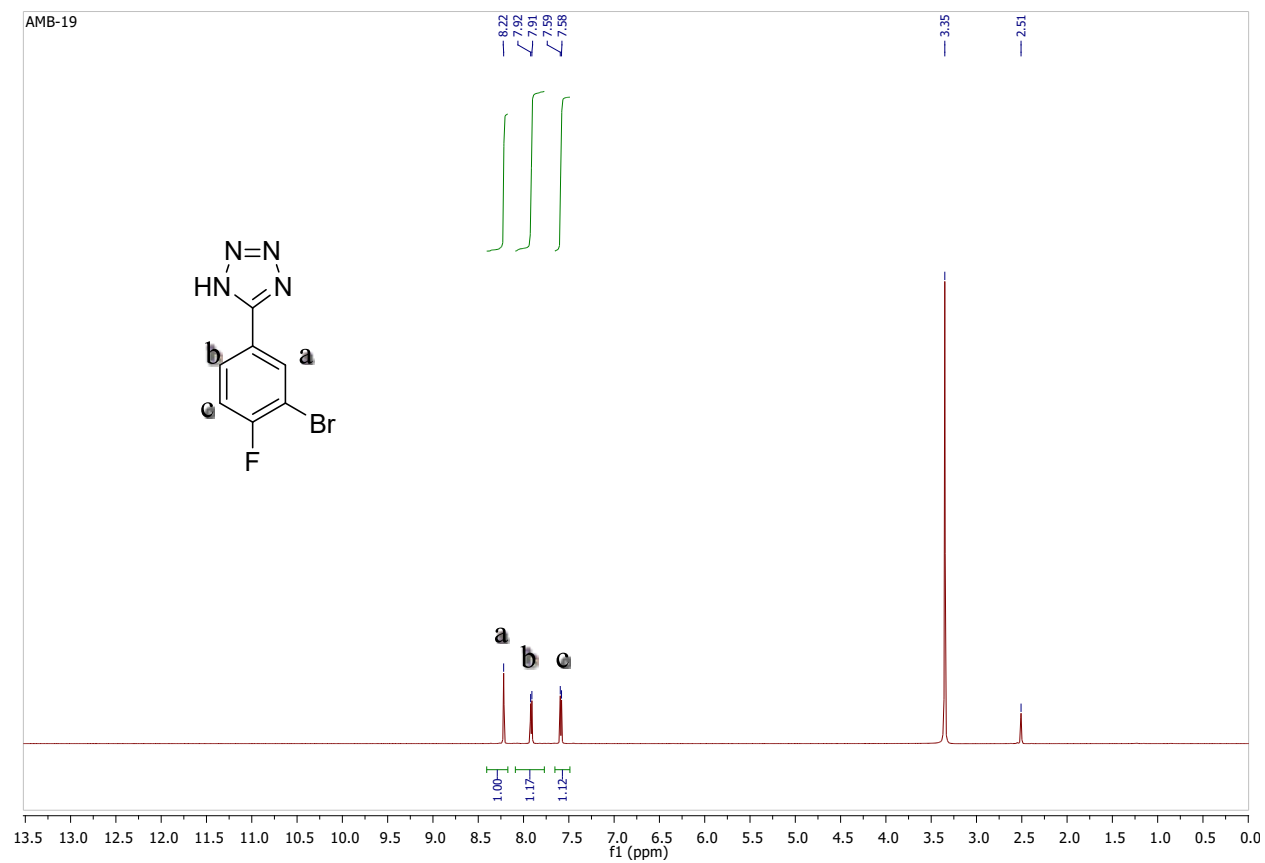

# <sup>13</sup>C NMR of 5-(3-bromo-4-fluorophenyl)-1H-tetrazole (5c)

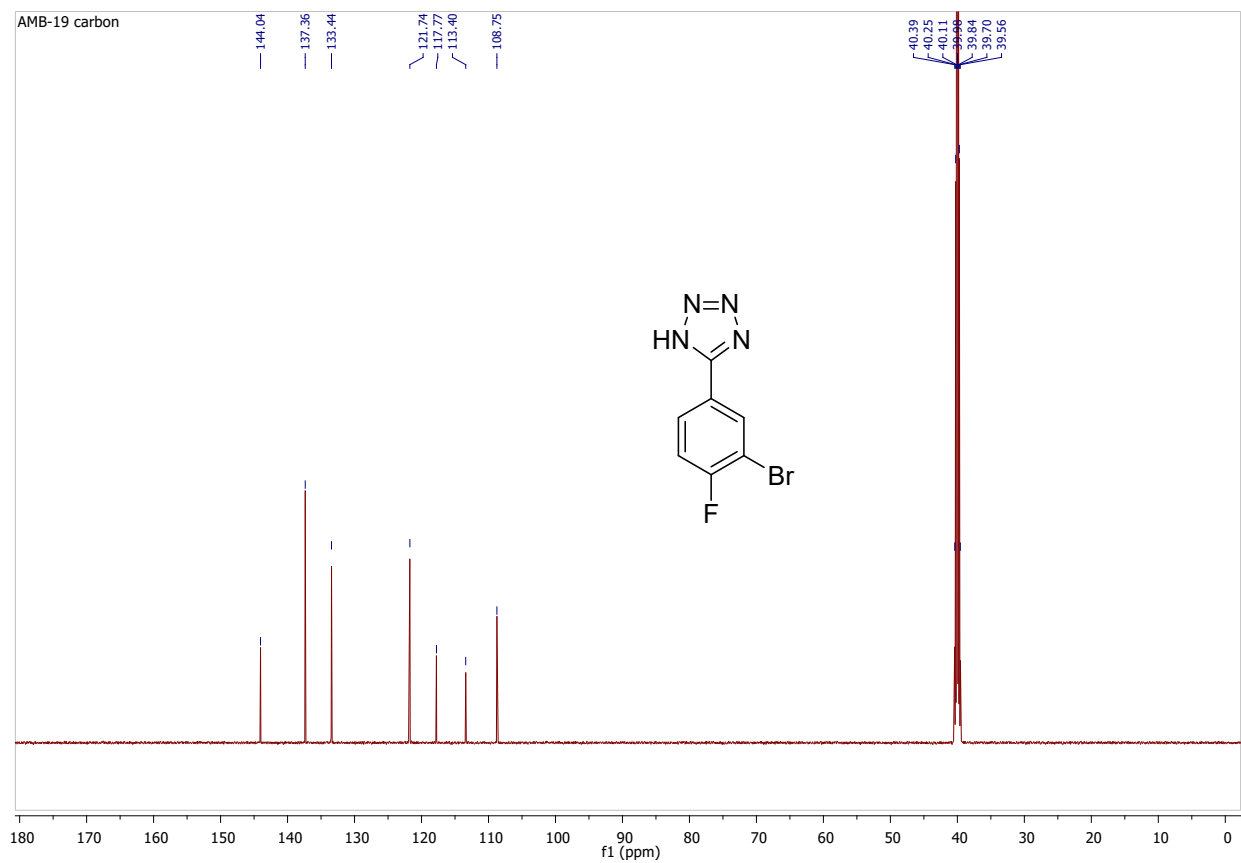

**FT-IR of 5-(3-bromo-4-fluorophenyl)-1H-tetrazole (5c)**

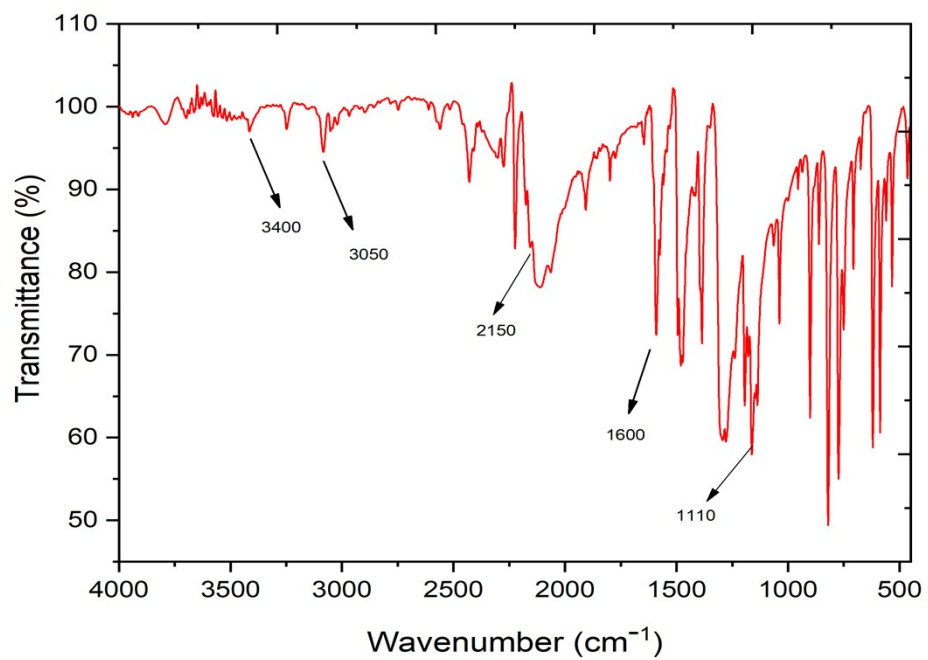

# <sup>1</sup>H NMR of 5-(2,4-difluorophenyl)-1H-tetrazole (5d)

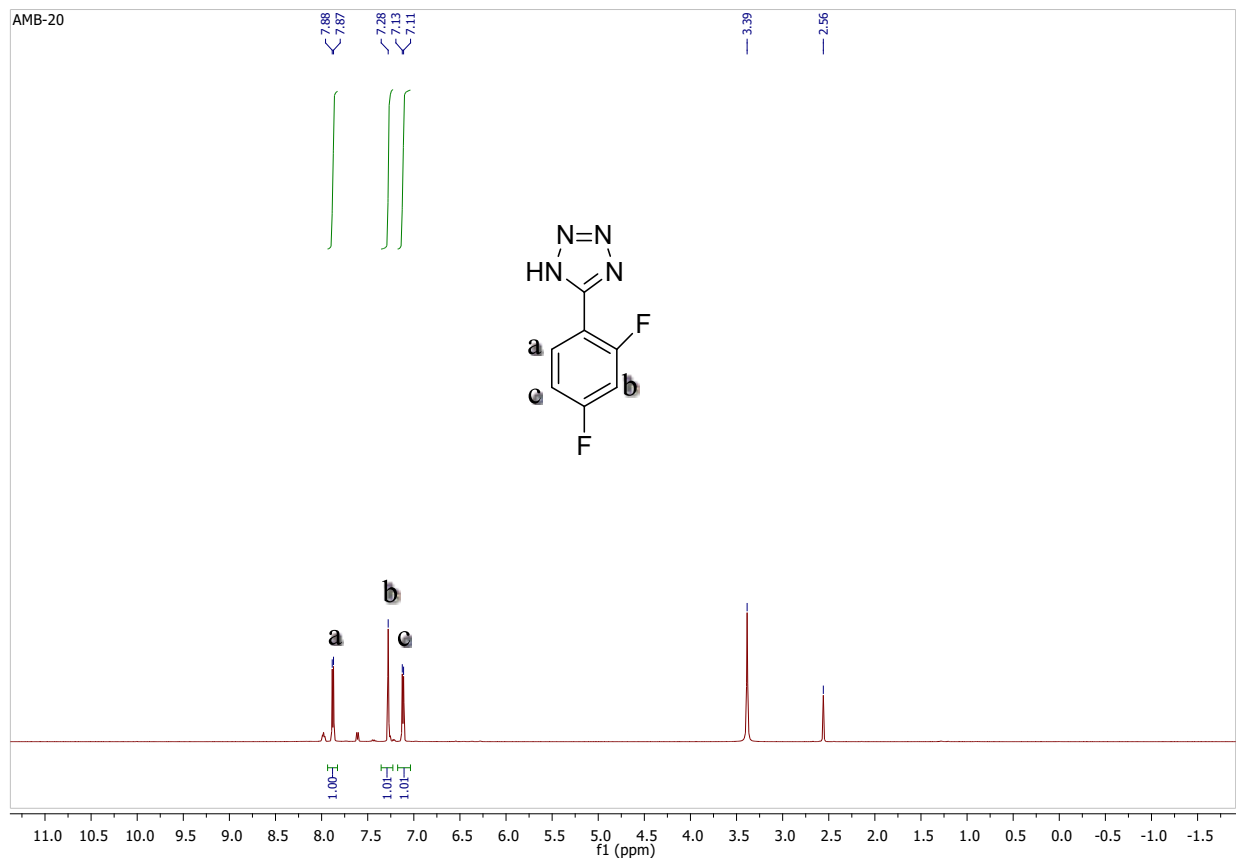

# <sup>13</sup>C NMR of 5-(2,4-difluorophenyl)-1H-tetrazole (5d)

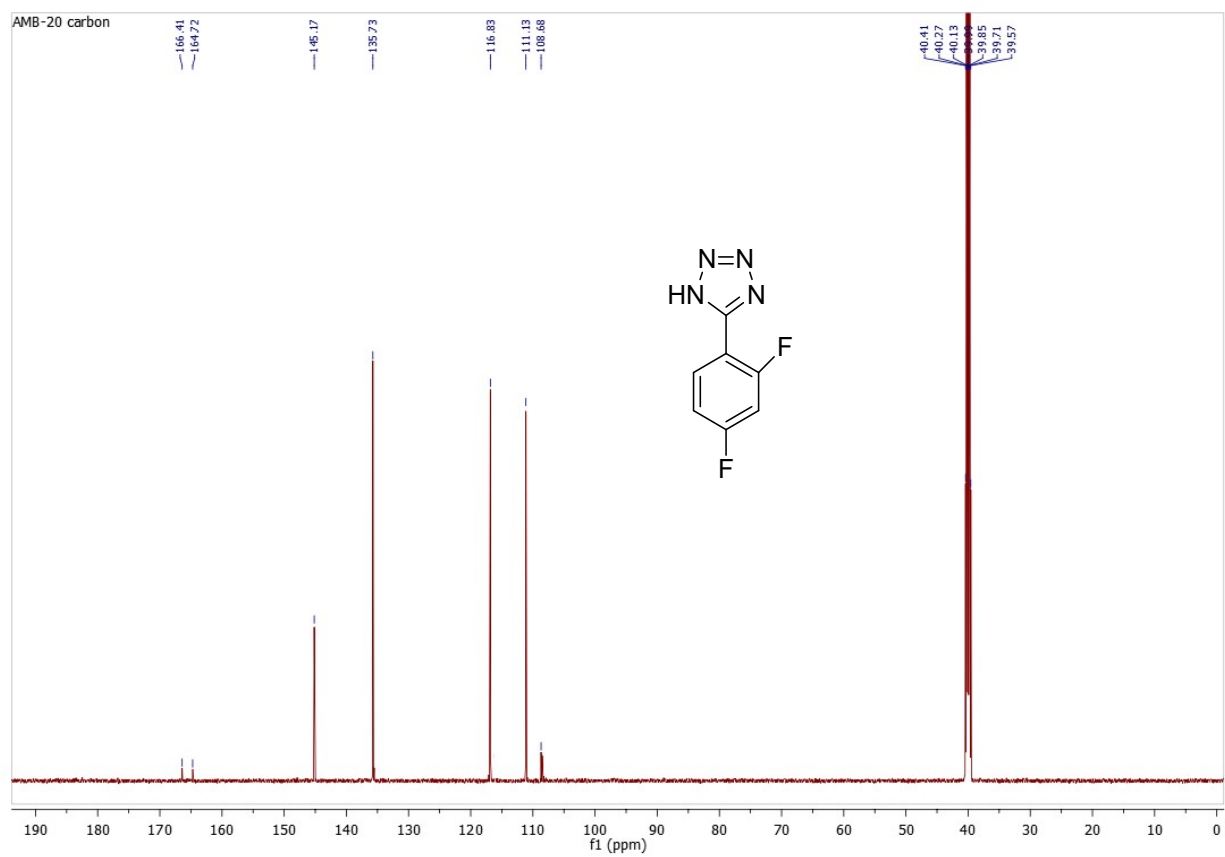



**FT-IR of 5-(2,4-difluorophenyl)-1H-tetrazole (5d)**

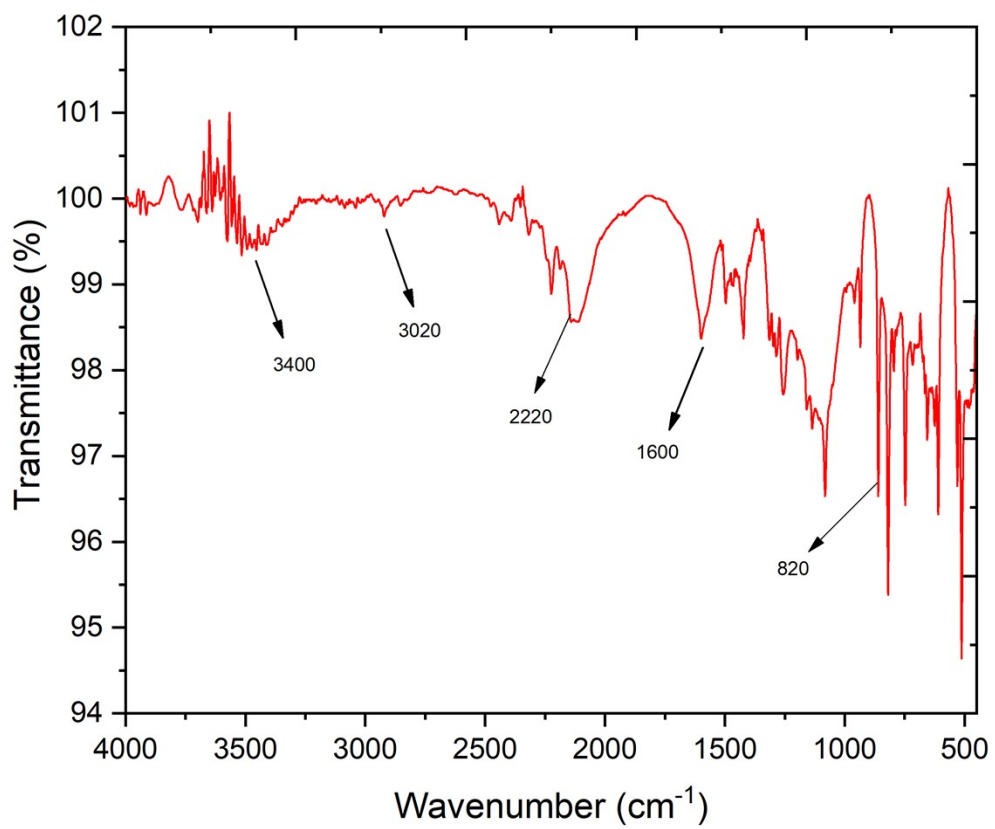

# <sup>1</sup>H NMR of 5-(2-fluorophenyl)-1H-tetrazole (5e)

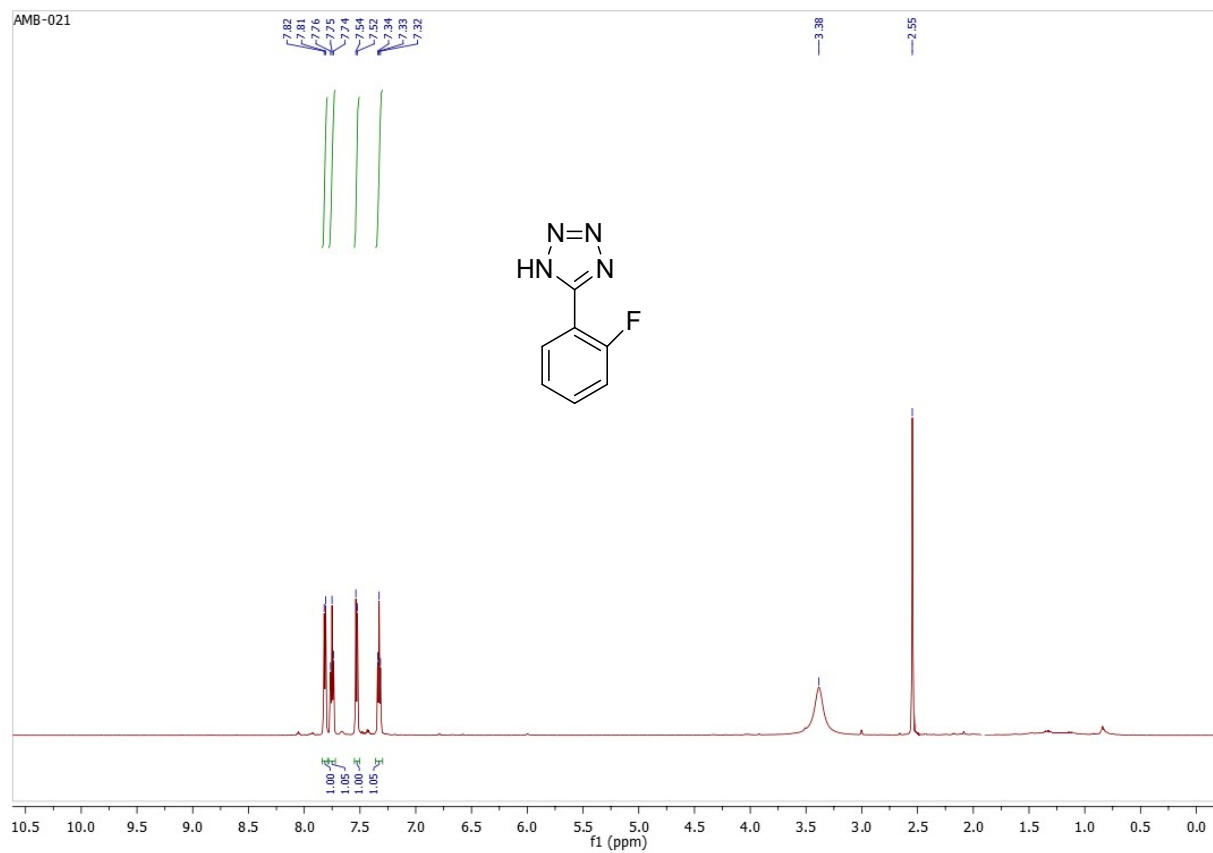

# <sup>13</sup>C NMR of 5-(2-fluorophenyl)-1H-tetrazole (5e)

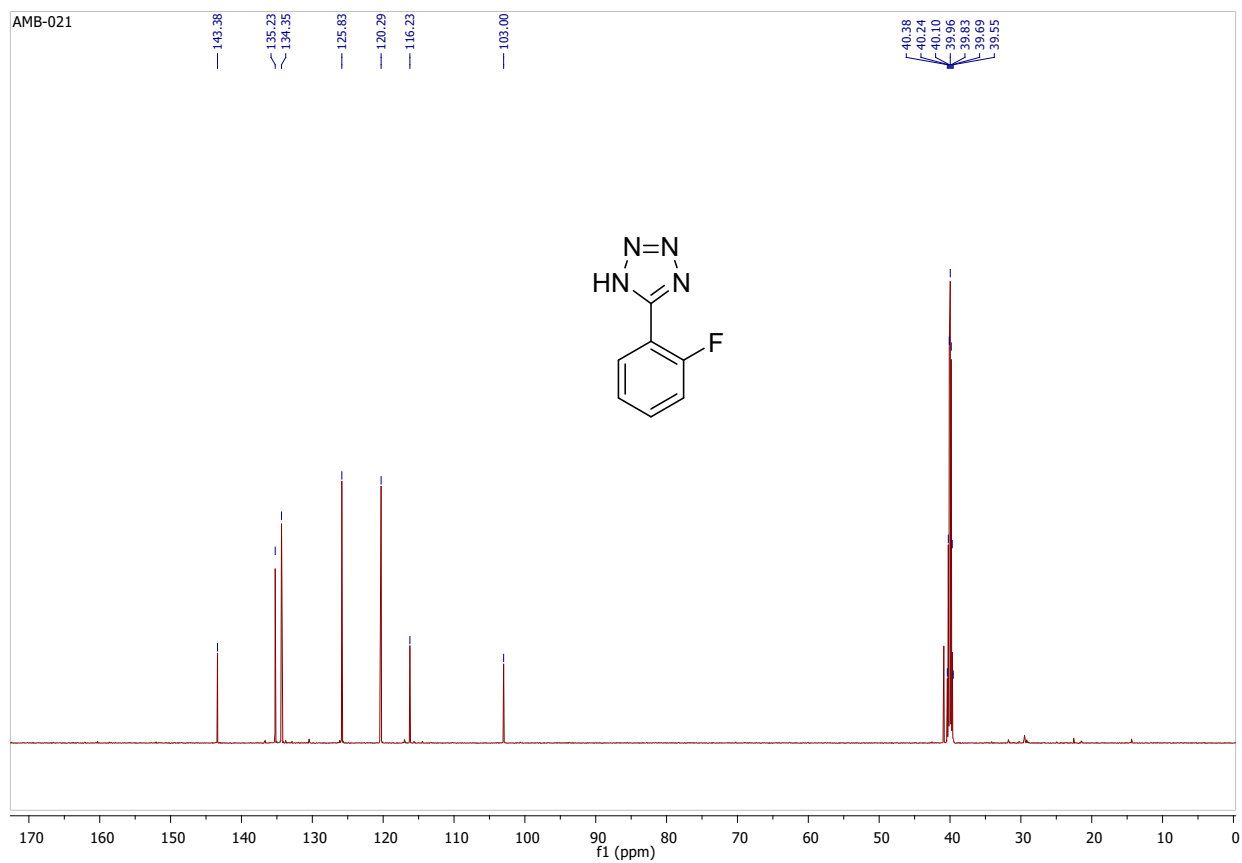

# <sup>1</sup>H NMR of 5-(2,6-dichlorophenyl)-1H-tetrazole (5f)

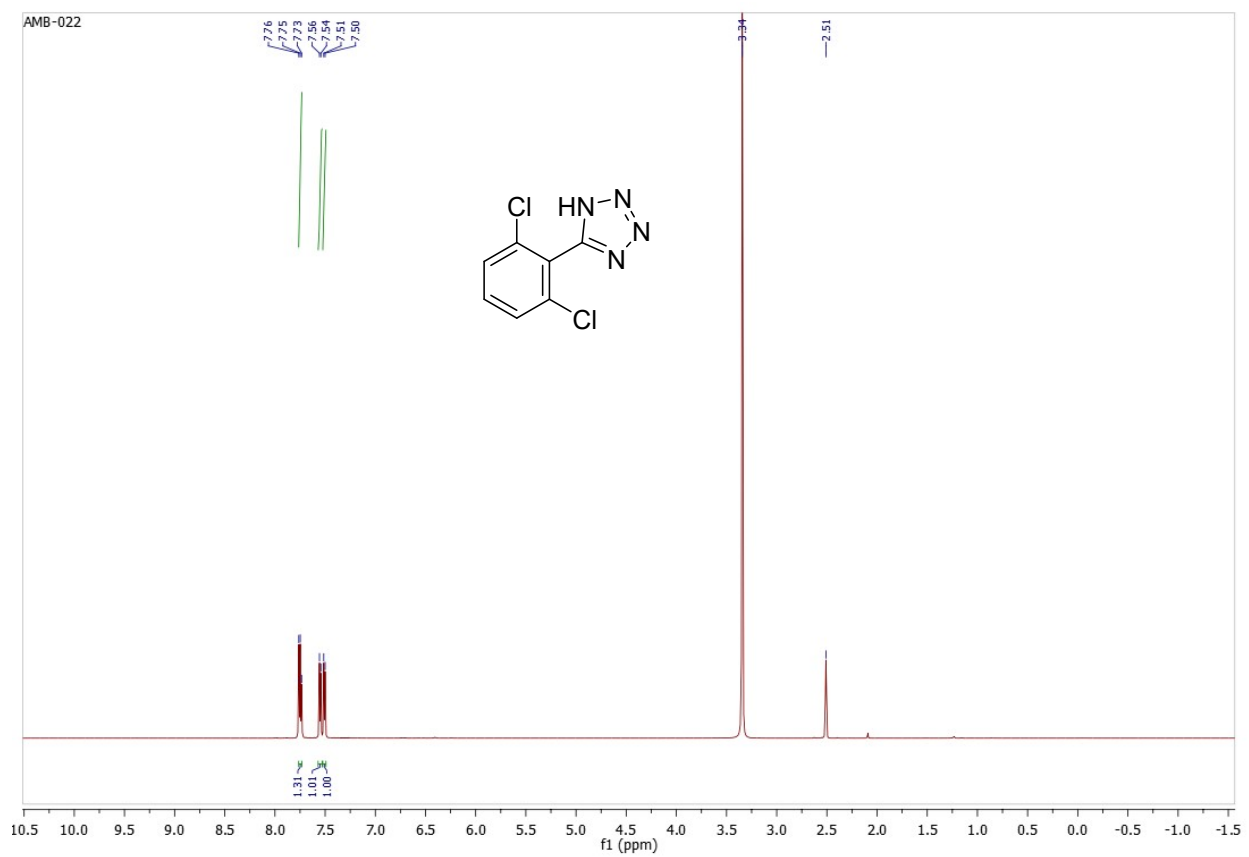

**<sup>13</sup>C NMR of 5-(2,6-dichlorophenyl)-1H-tetrazole (5f)**

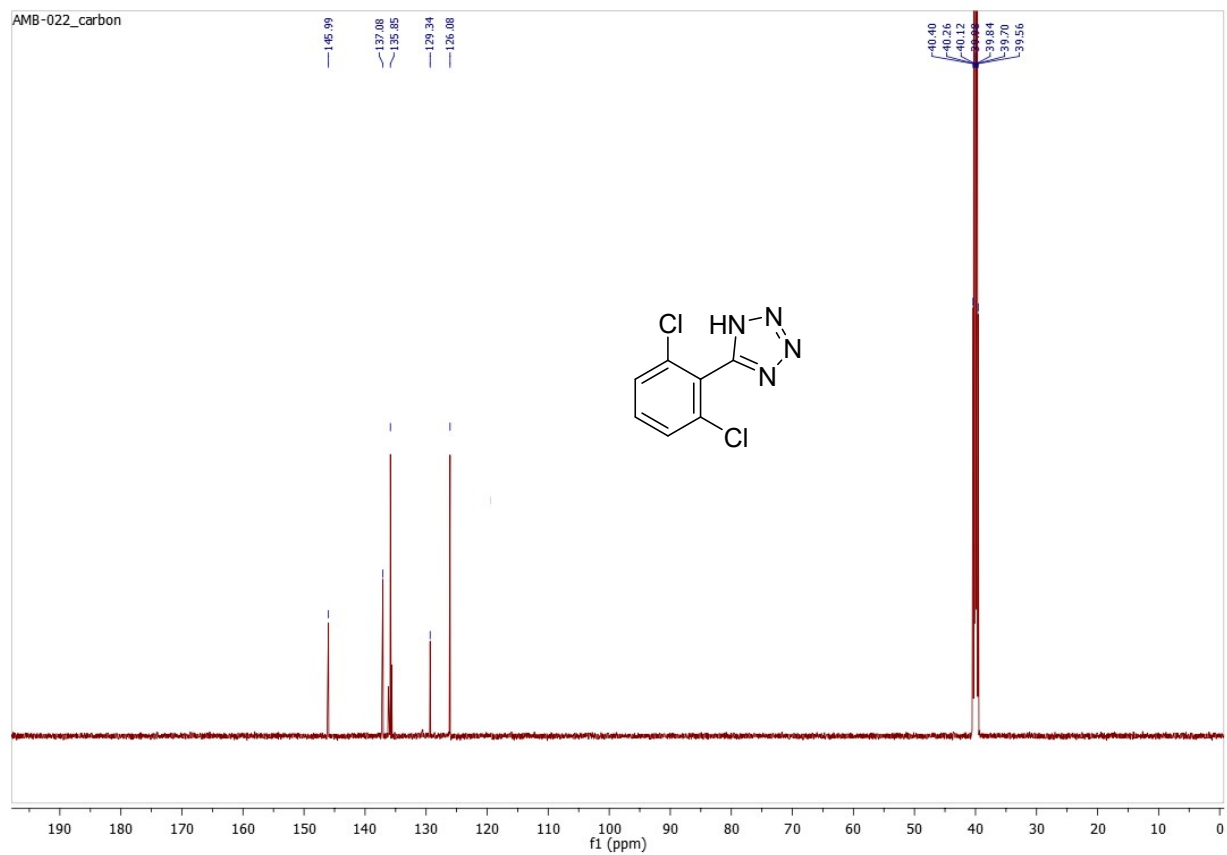

## HRMS of 5-(2,6-dichlorophenyl)-1H-tetrazole (5f)

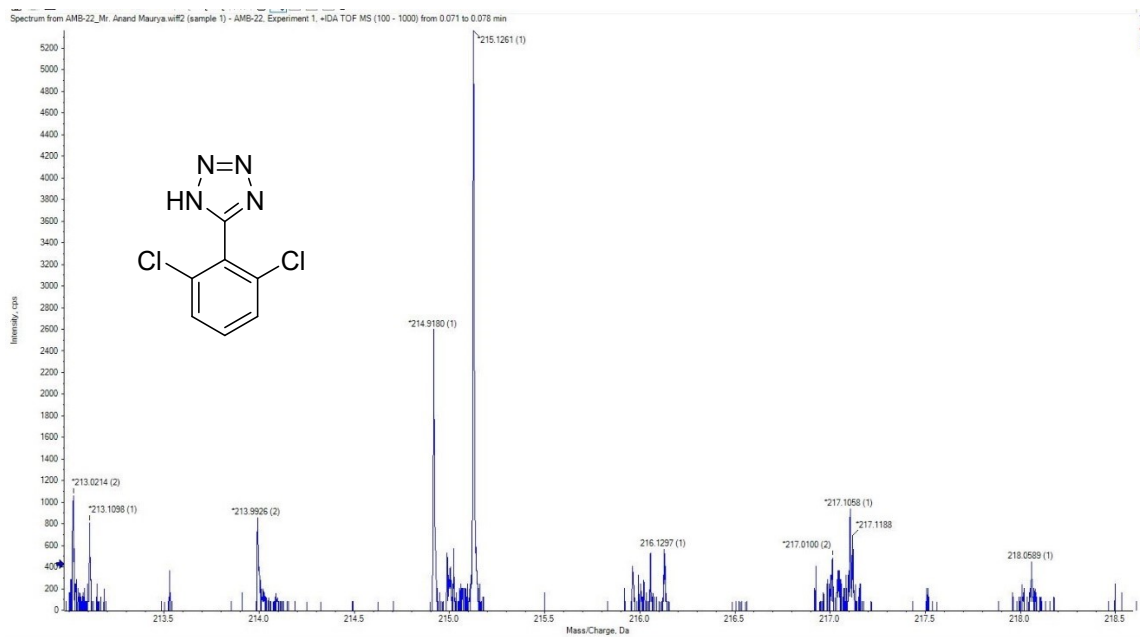

**FT-IR of 5-(2,6-dichlorophenyl)-1H-tetrazole (5f)**

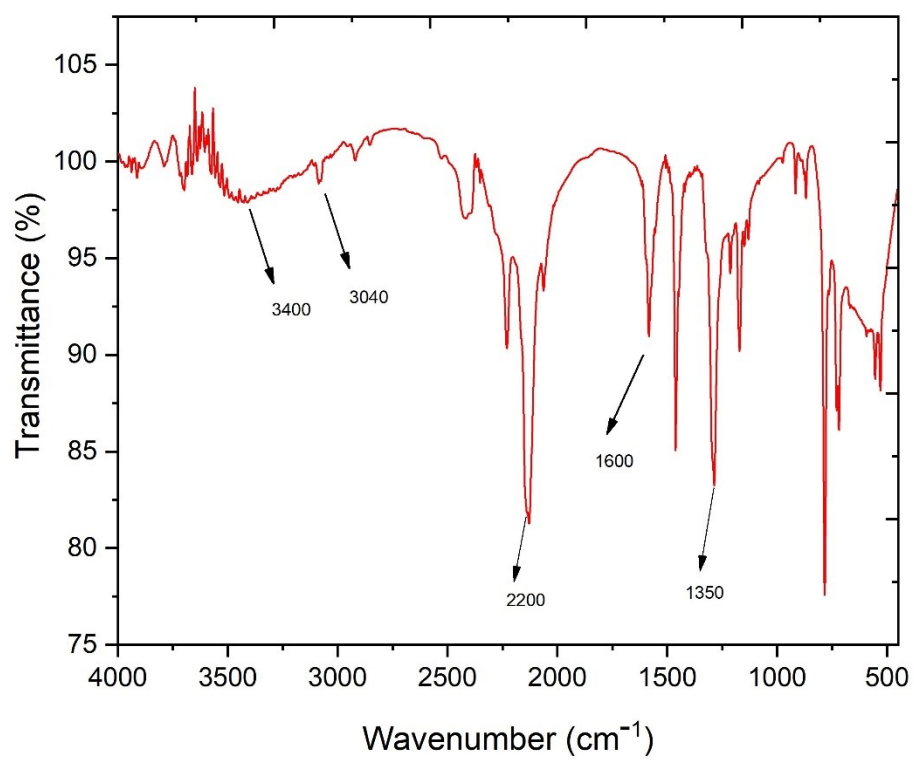

# <sup>1</sup>H NMR of 5-phenyl-1H-tetrazole (5g)

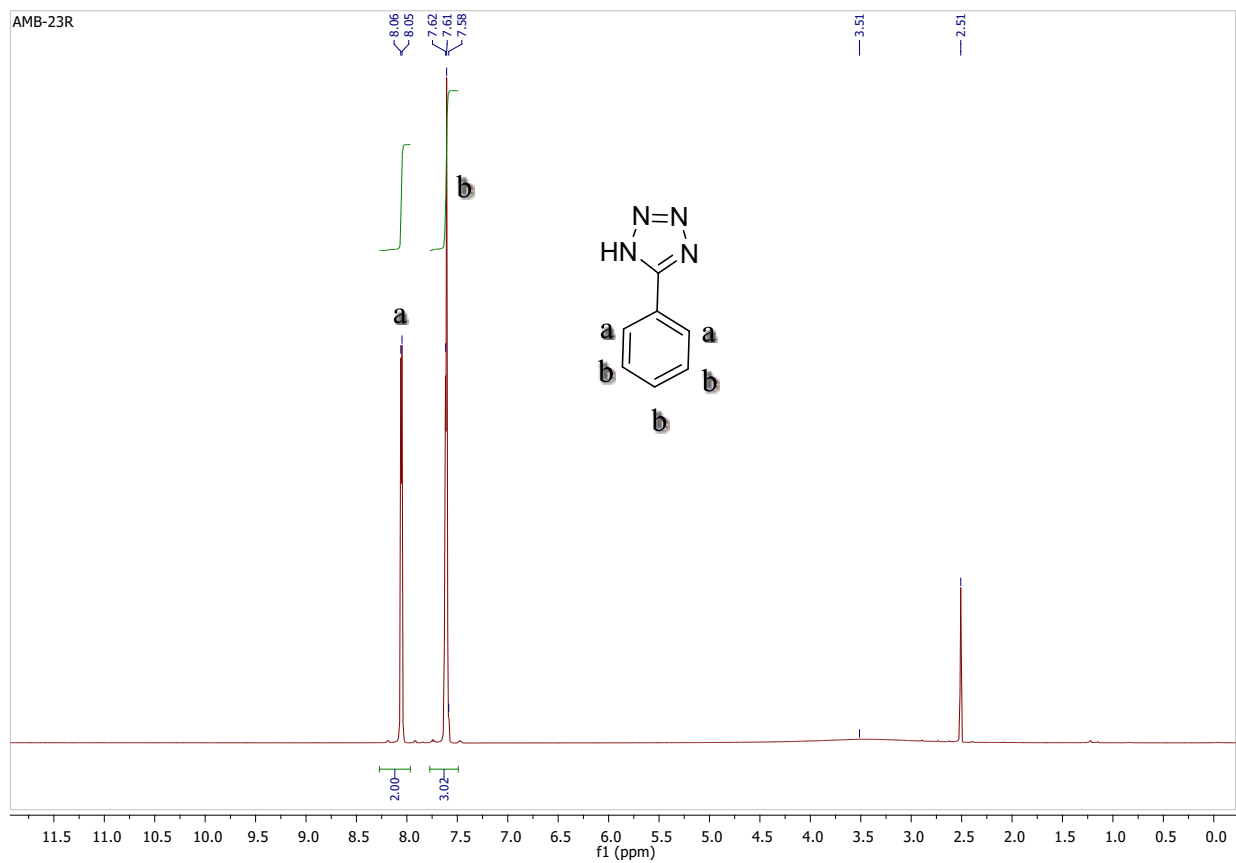



# <sup>13</sup>C NMR of 5-phenyl-1H-tetrazole (5g)

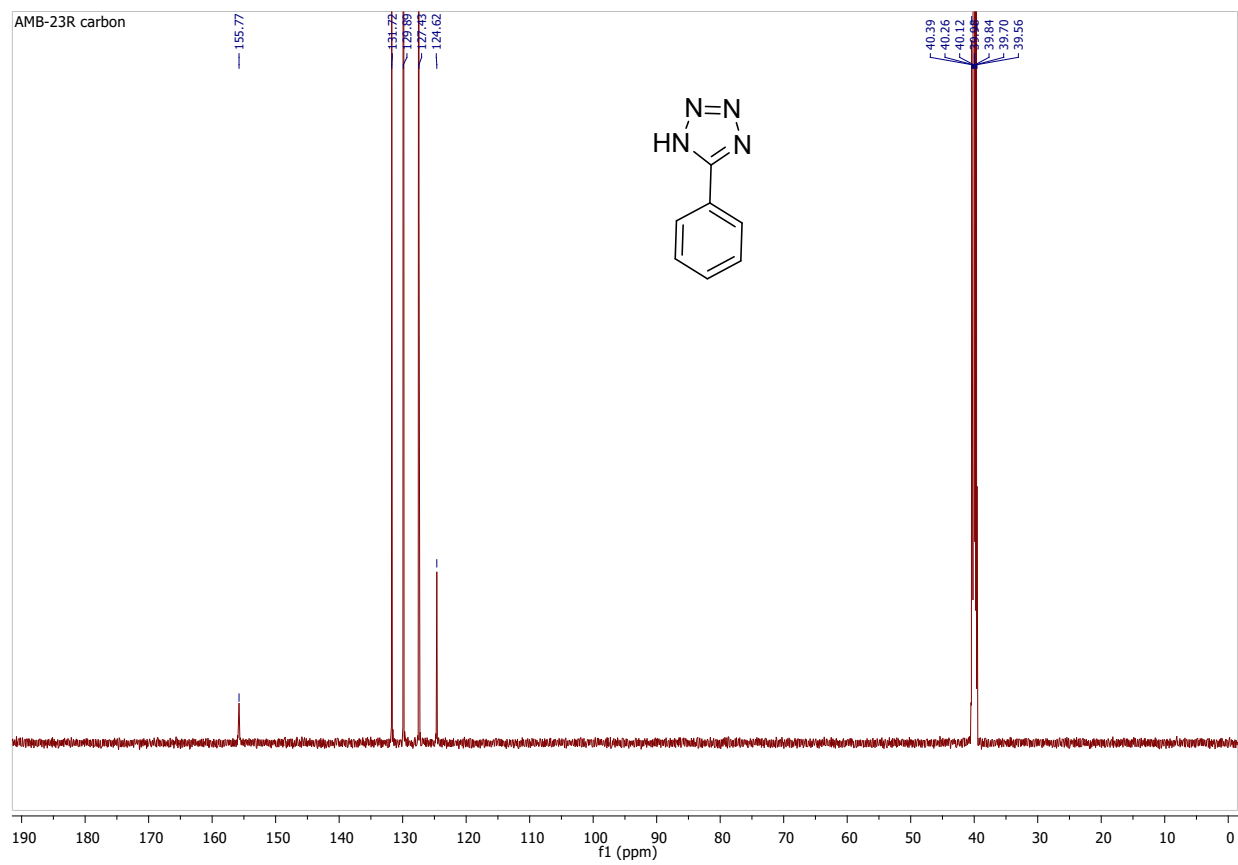

**FT-IR of 5-phenyl-1H-tetrazole (5g)**

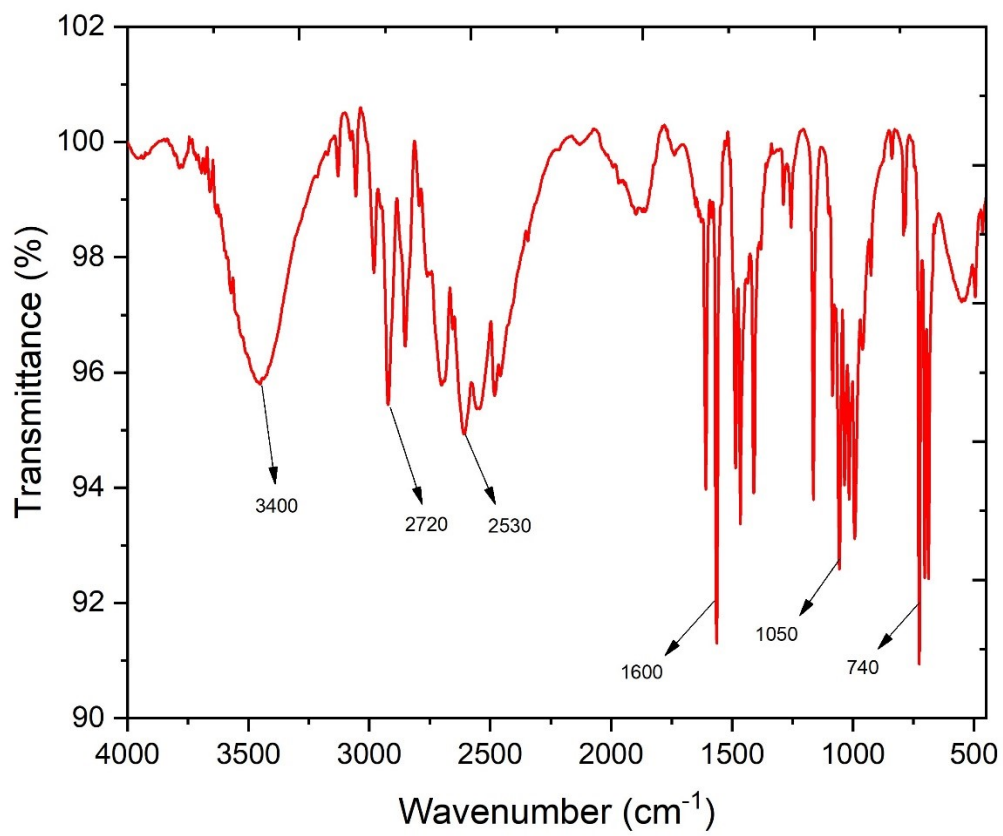

# <sup>1</sup>H NMR of 5-(2-chloro-6-fluorophenyl)-1H-tetrazole (5h)

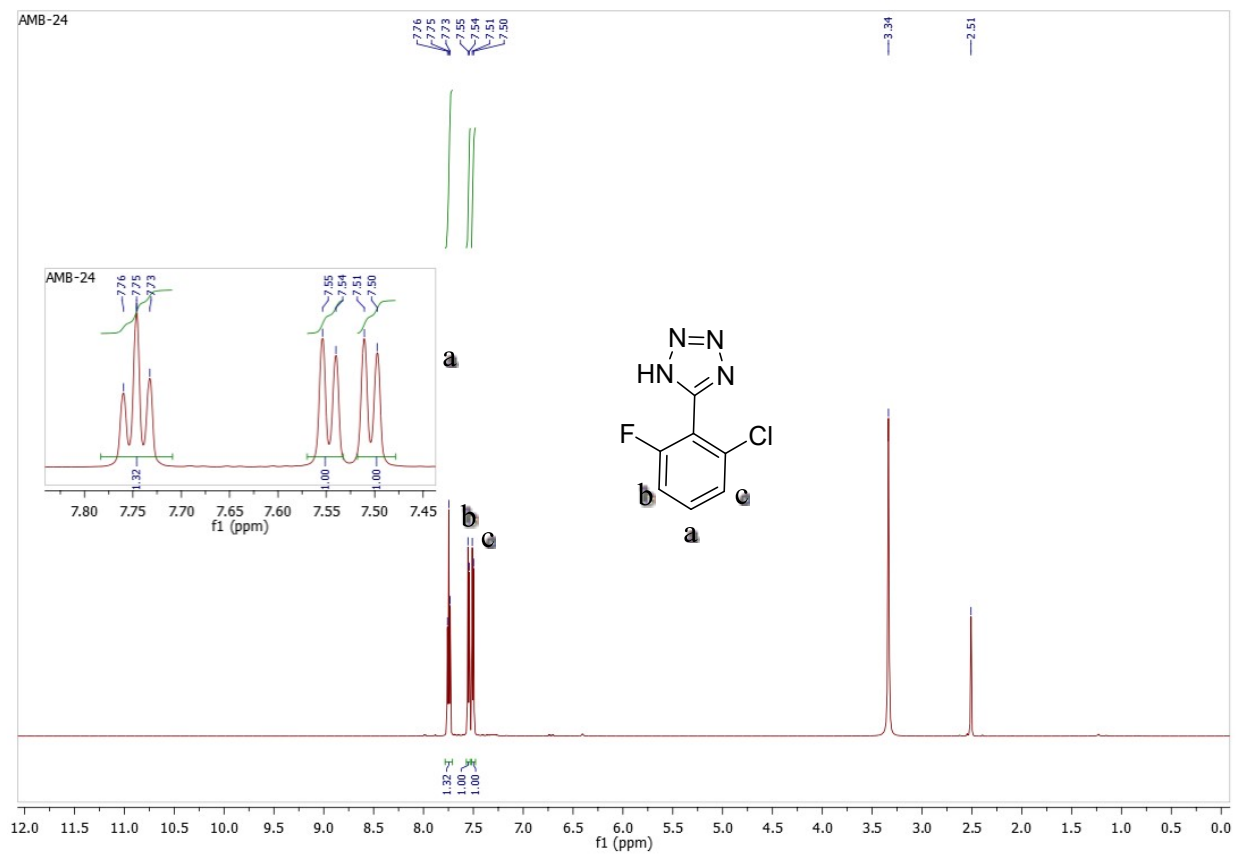

# <sup>13</sup>C NMR of 5-(2-chloro-6-fluorophenyl)-1H-tetrazole (5h)

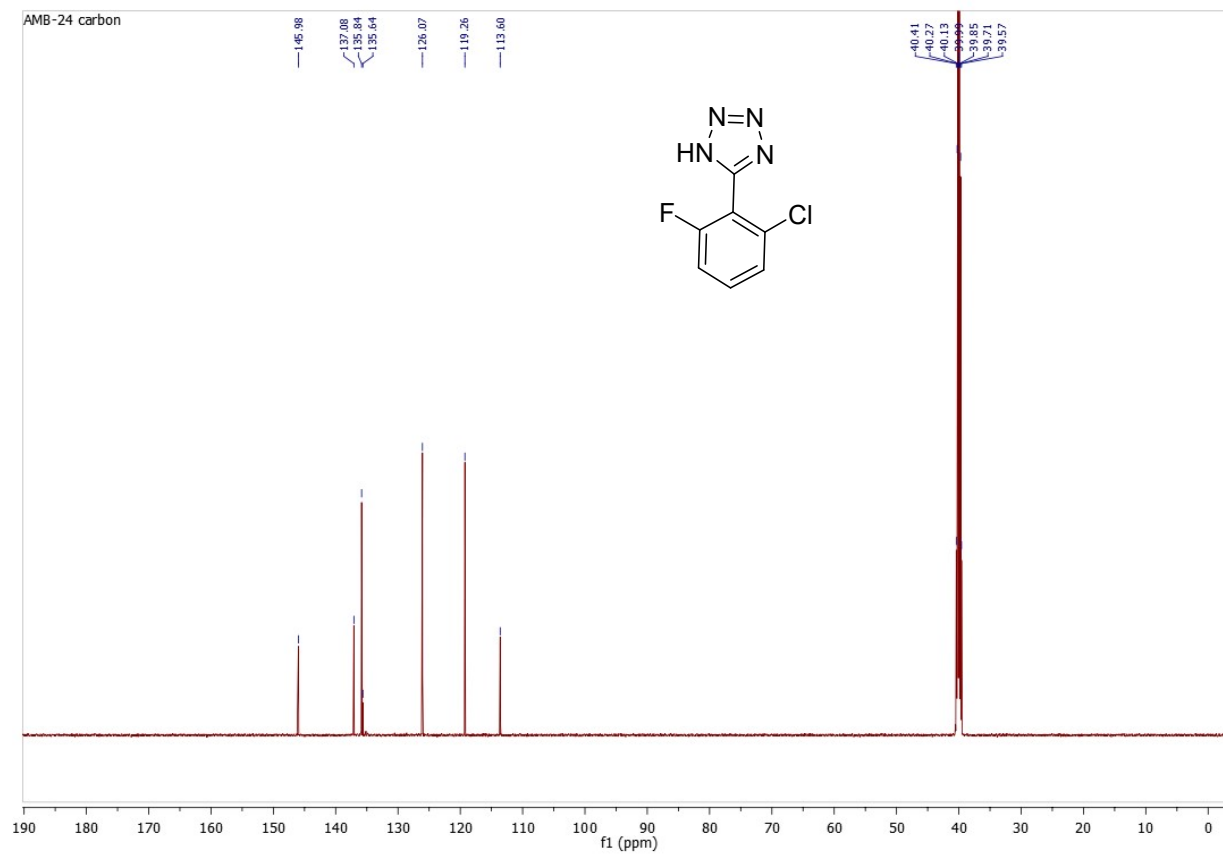

**FT-IR of 5-(2-chloro-6-fluorophenyl)-1H-tetrazole (5h)**

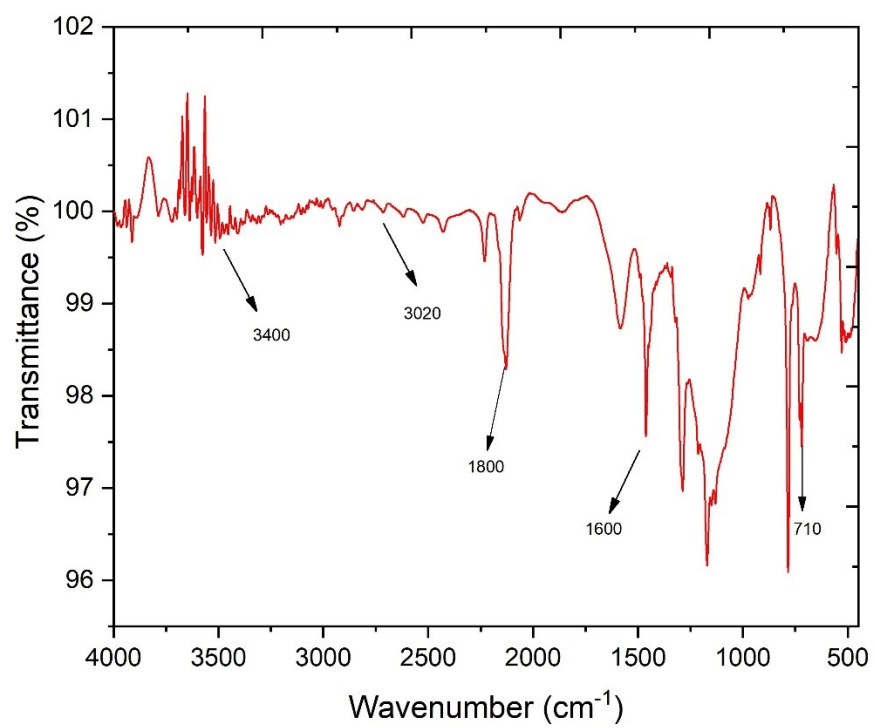

# <sup>1</sup>H NMR of 5-(3-fluorophenyl)-1H-tetrazole (5i)

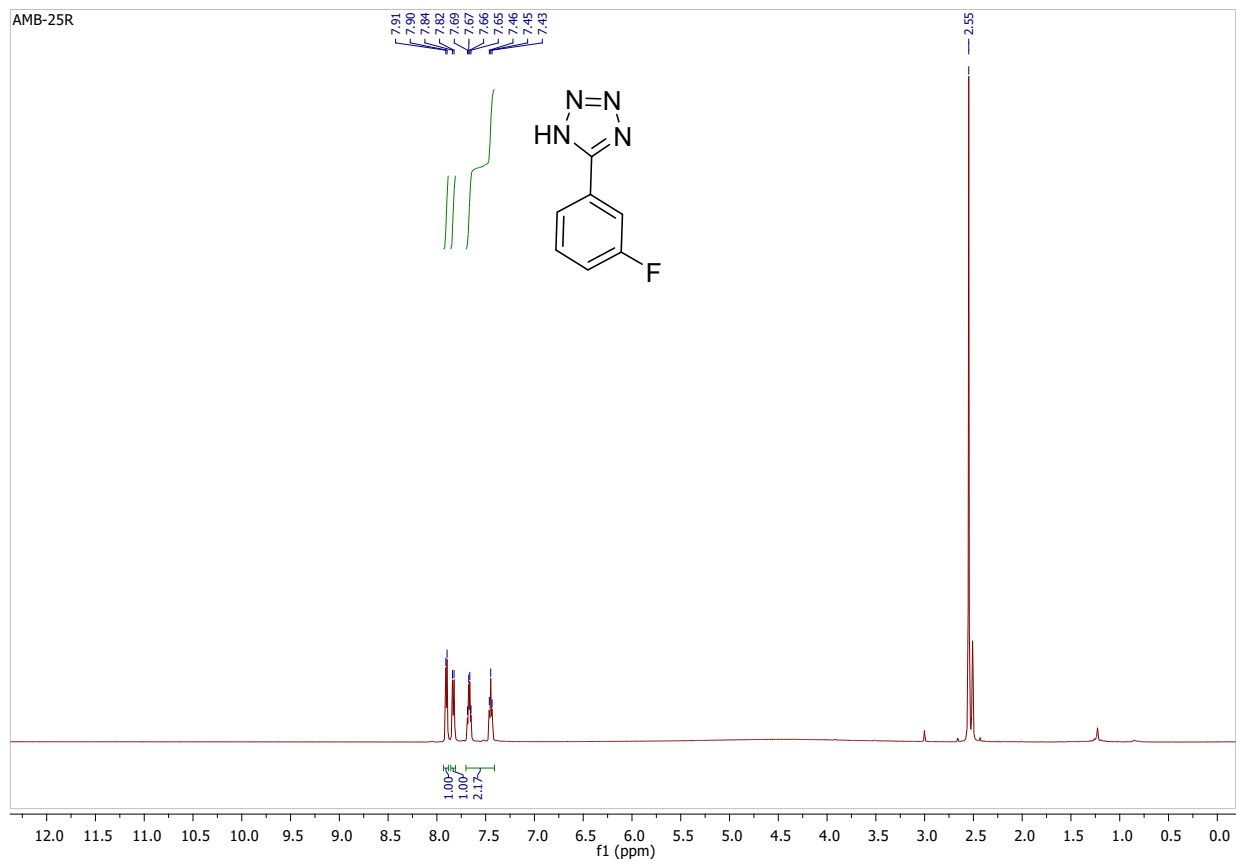

# <sup>13</sup>C NMR of 5-(3-fluorophenyl)-1H-tetrazole (5i)

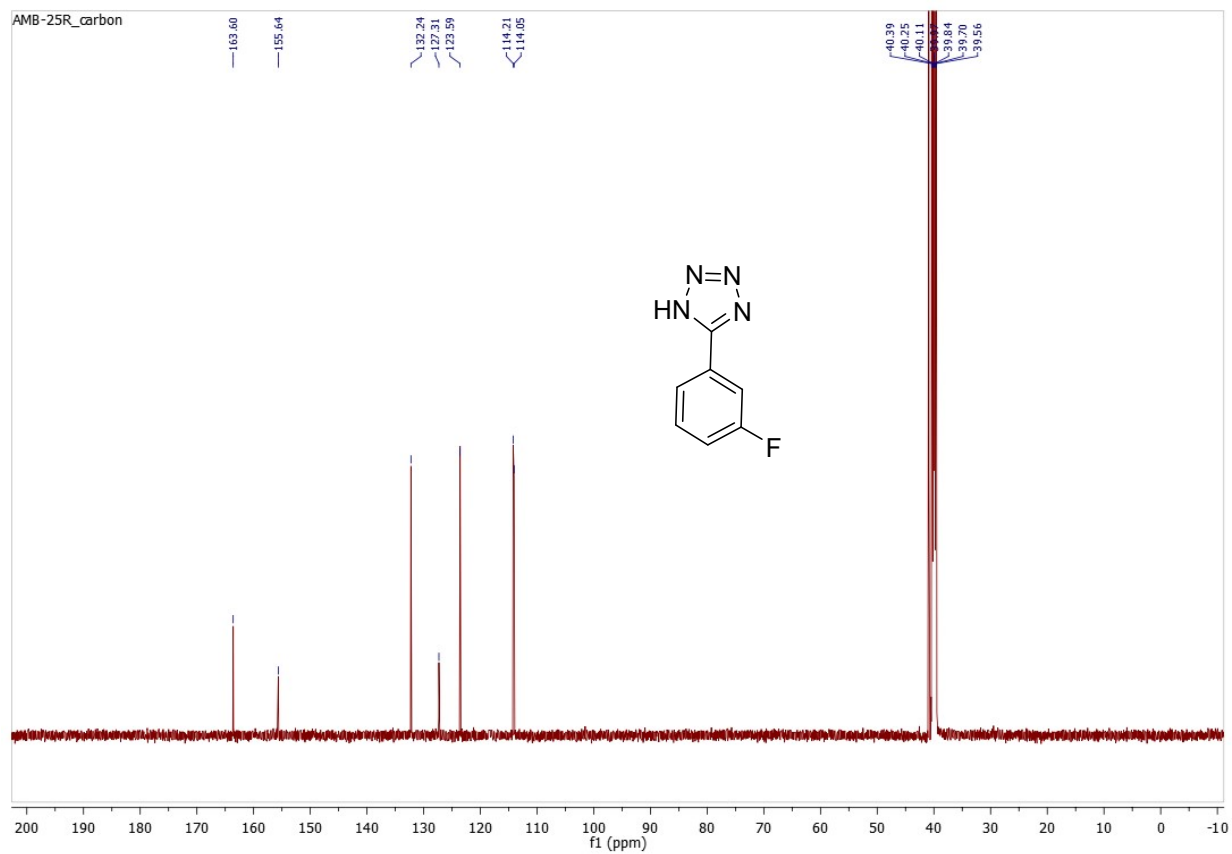

**FT-IR of 5-(3-fluorophenyl)-1H-tetrazole (5i)**

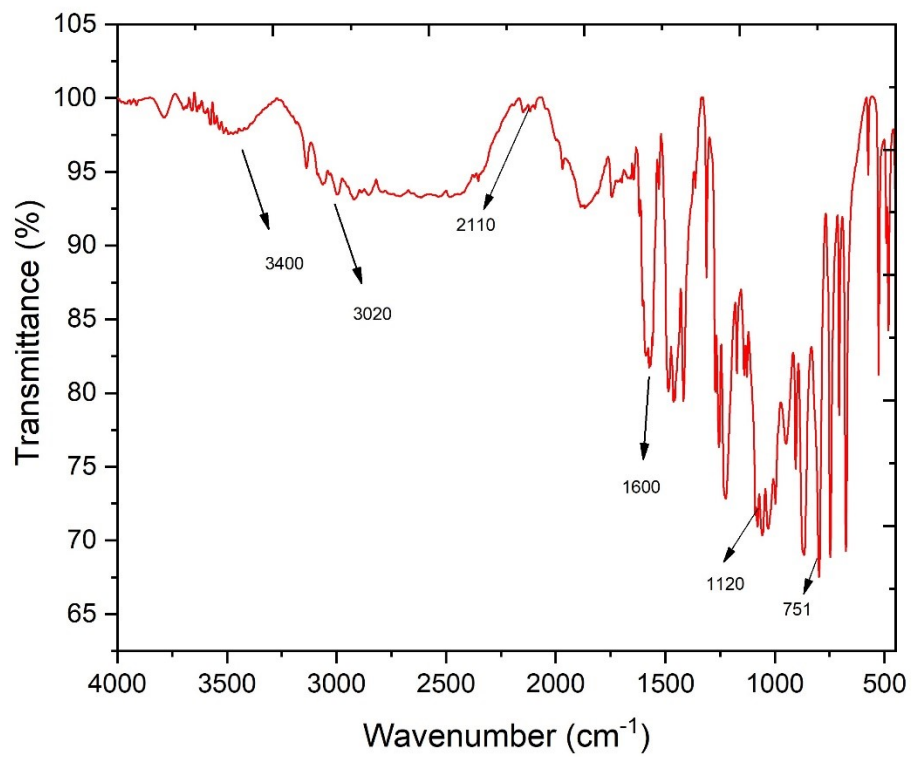



# <sup>1</sup>H NMR of 2-chloro-4-(1H-tetrazol-5-yl)pyridine (5j)

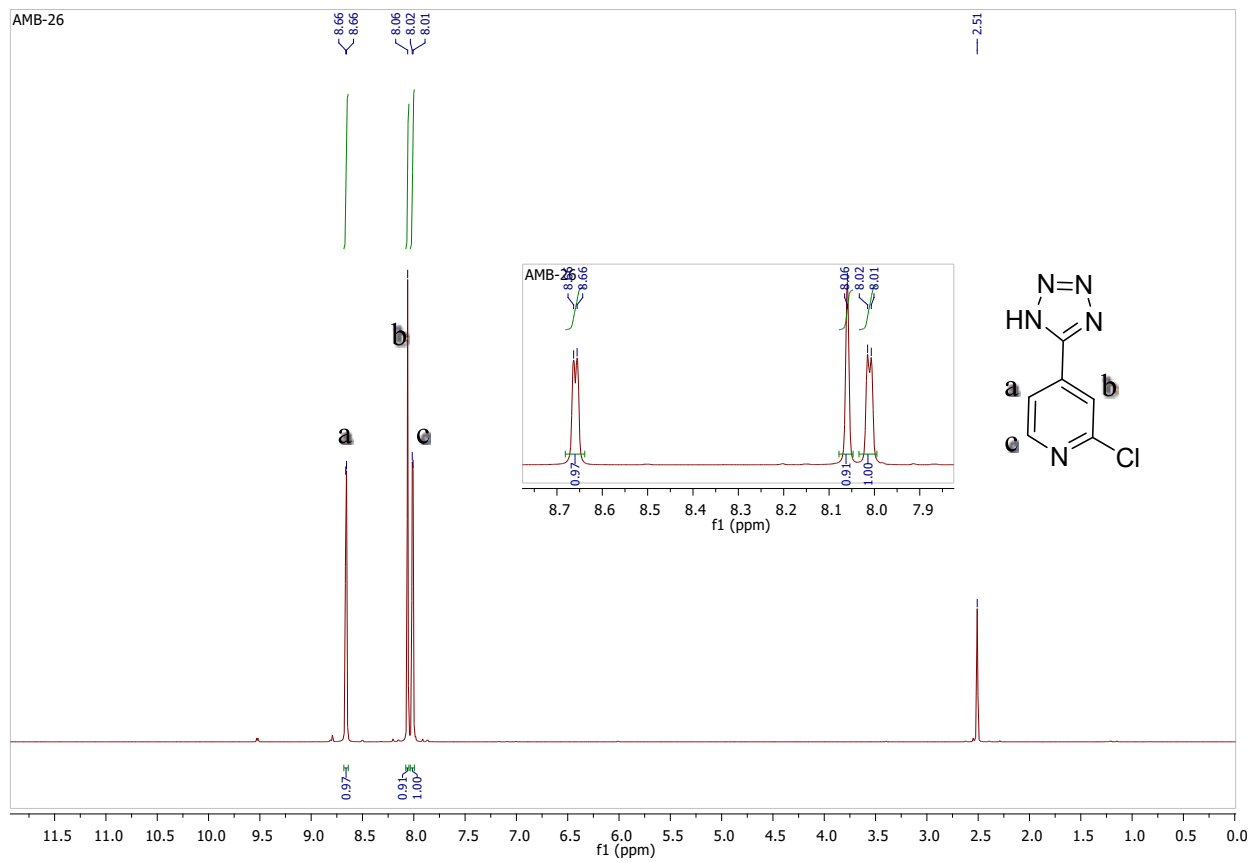

# <sup>13</sup>C NMR of 2-chloro-4-(1H-tetrazol-5-yl)pyridine (5j)

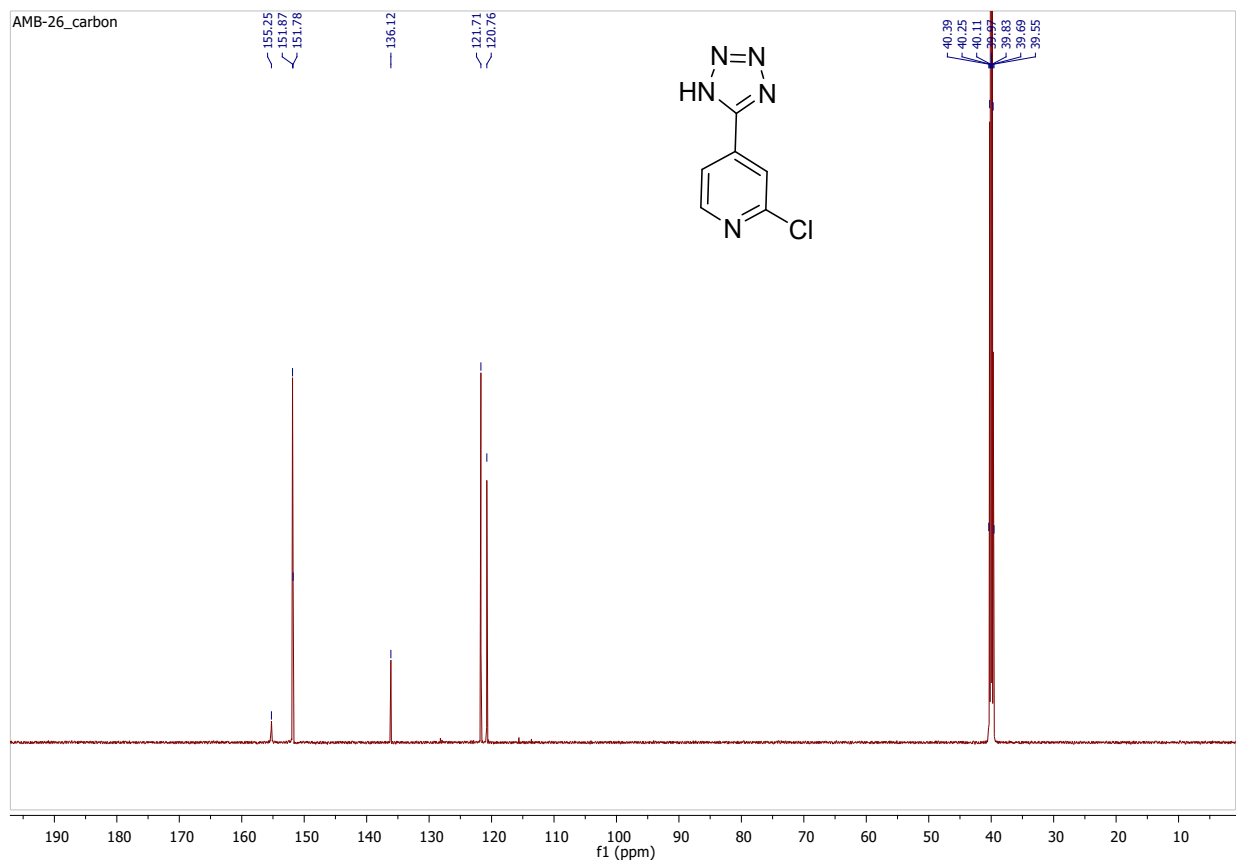

**FT-IR of 2-chloro-4-(1H-tetrazol-5-yl)pyridine (5j)**

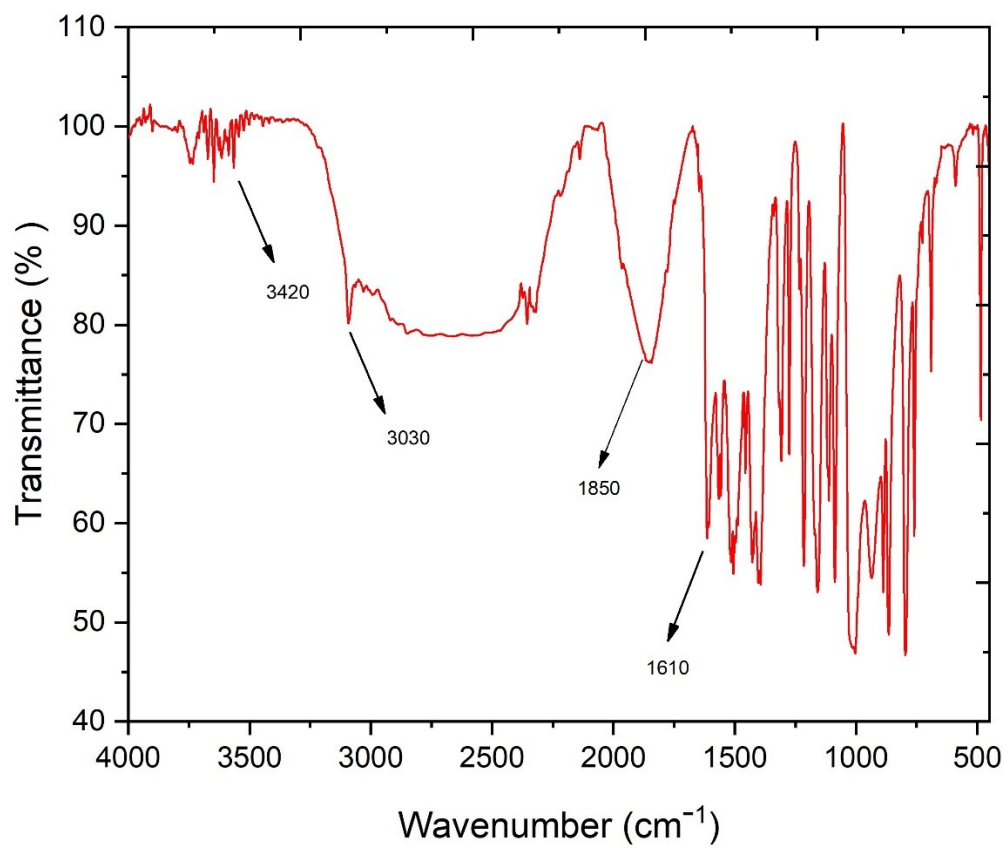

**<sup>1</sup>H NMR of 5-(4-bromophenyl)-1H-tetrazole (5k)**

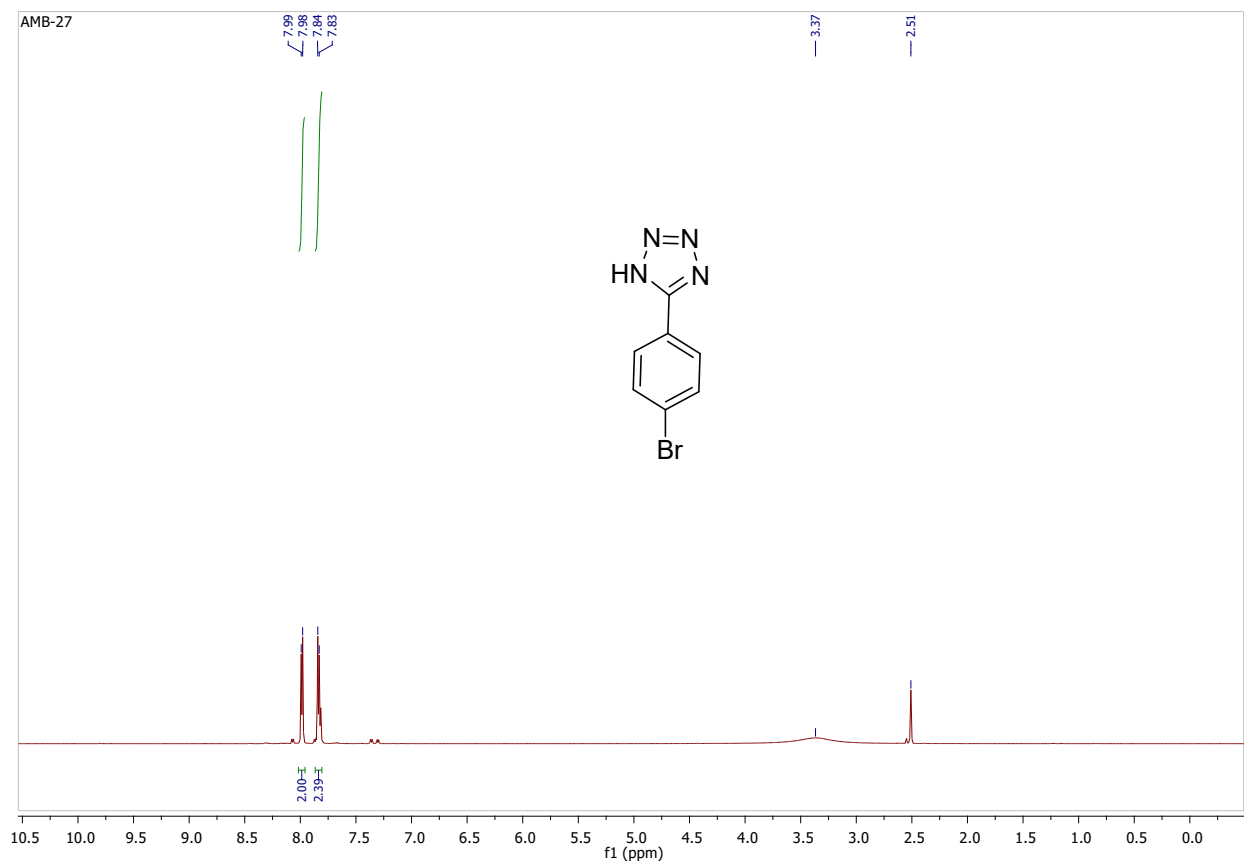

**<sup>13</sup>C NMR of 5-(4-bromophenyl)-1H-tetrazole (5k)**

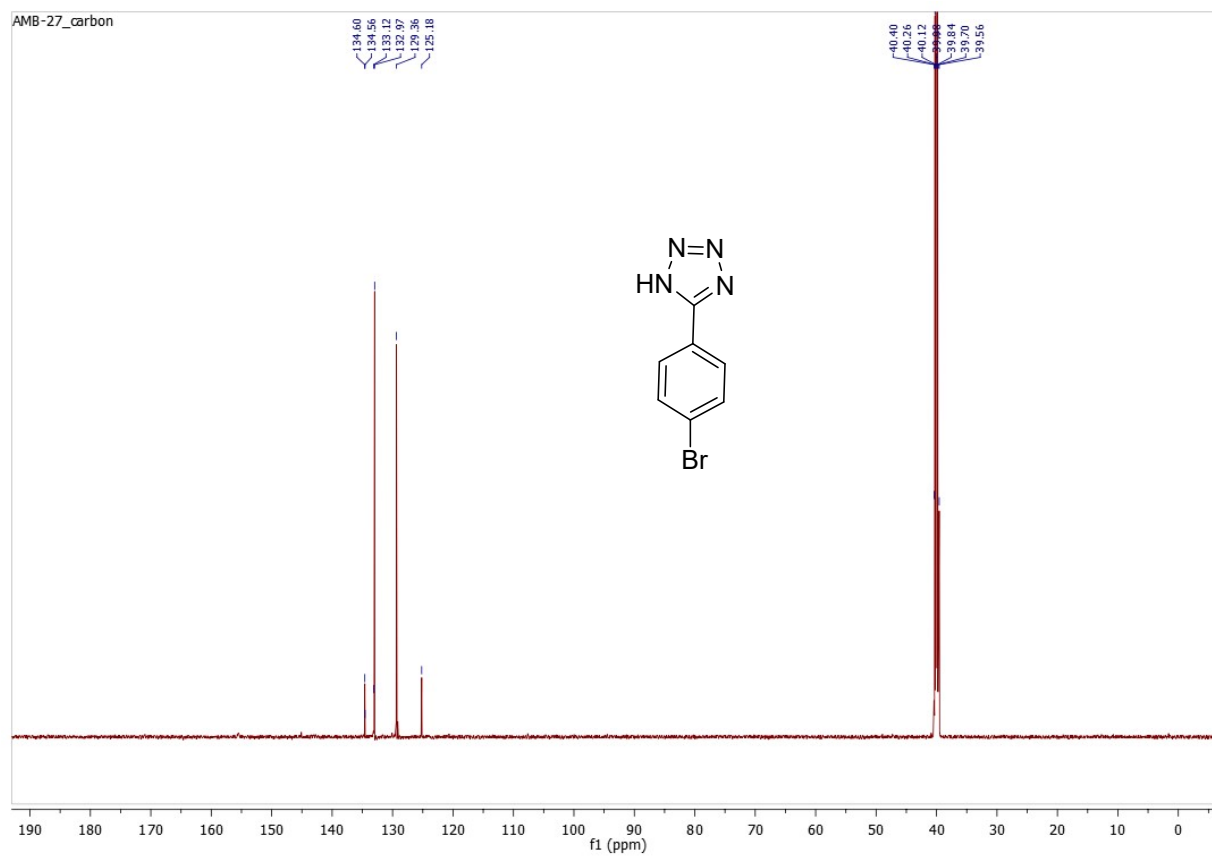

**FT-IR of 5-(4-bromophenyl)-1H-tetrazole (5k)**

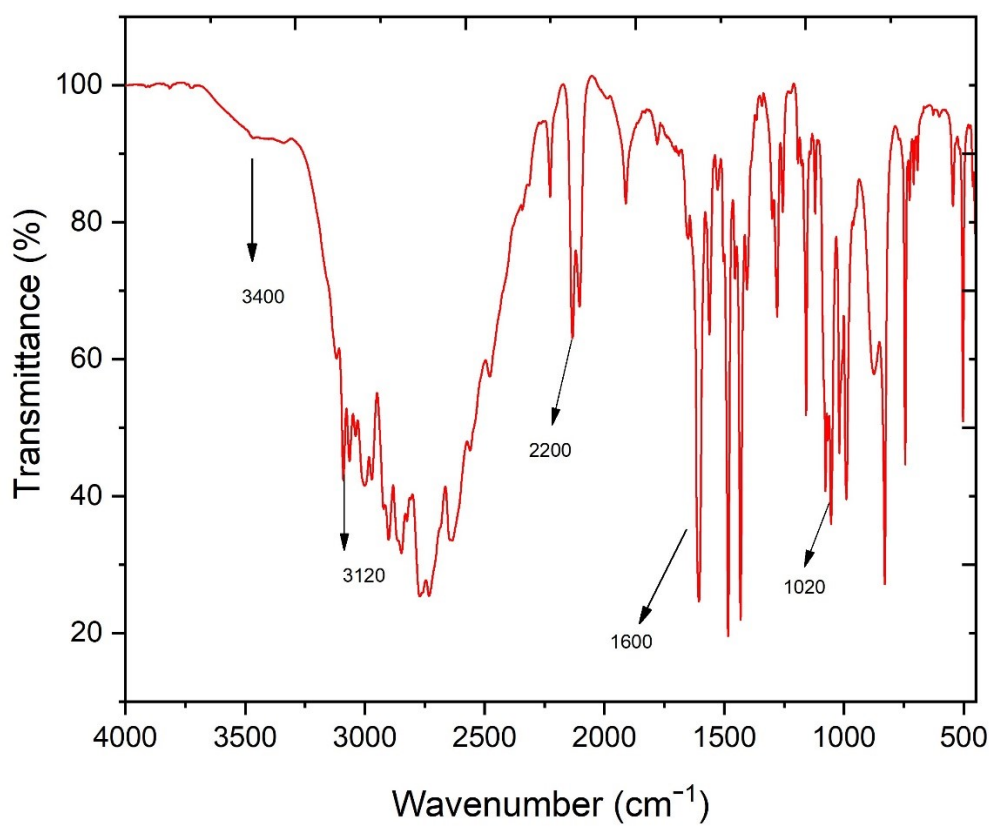

**<sup>1</sup>H NMR of 2-bromo-4-(1H-tetrazol-5-yl)phenol (5I)**

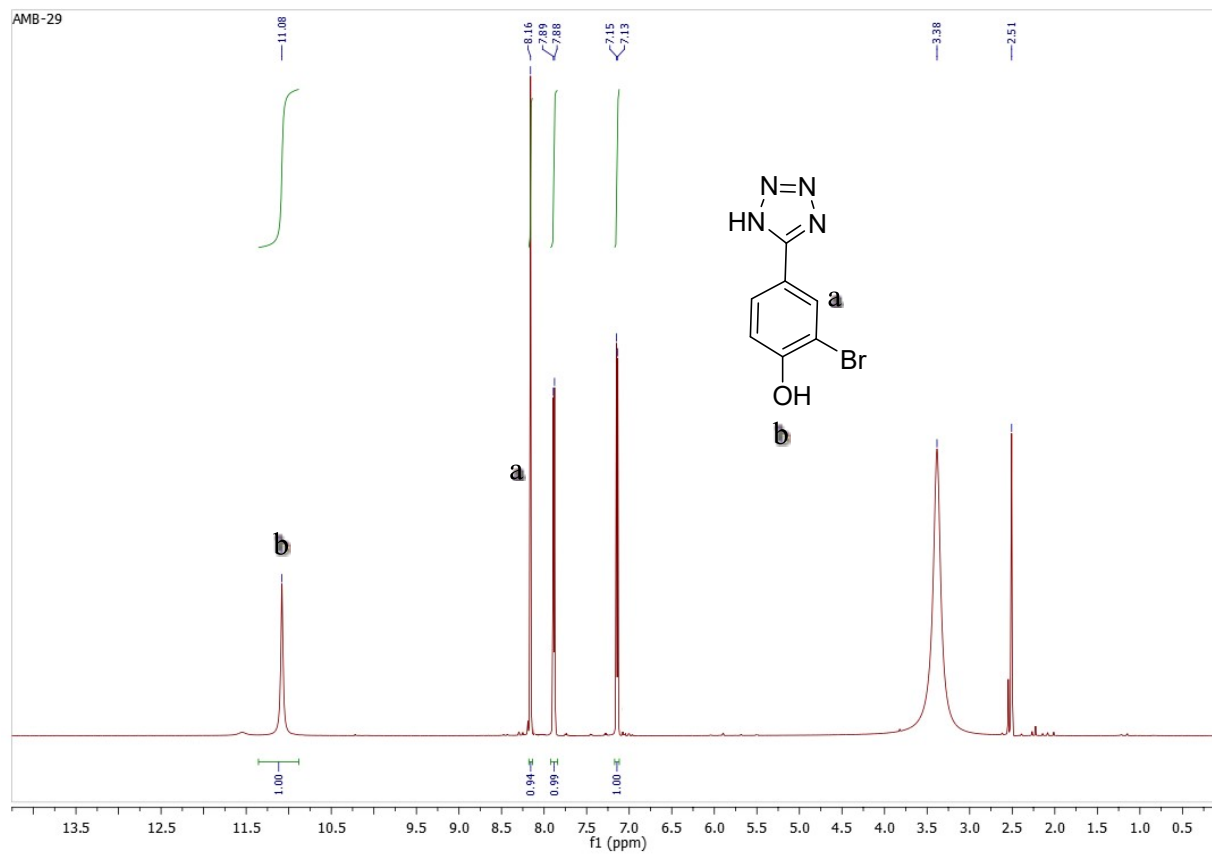

**<sup>13</sup>C NMR of 2-bromo-4-(1H-tetrazol-5-yl)phenol (5l)**

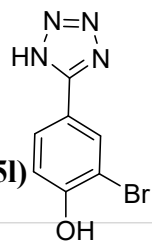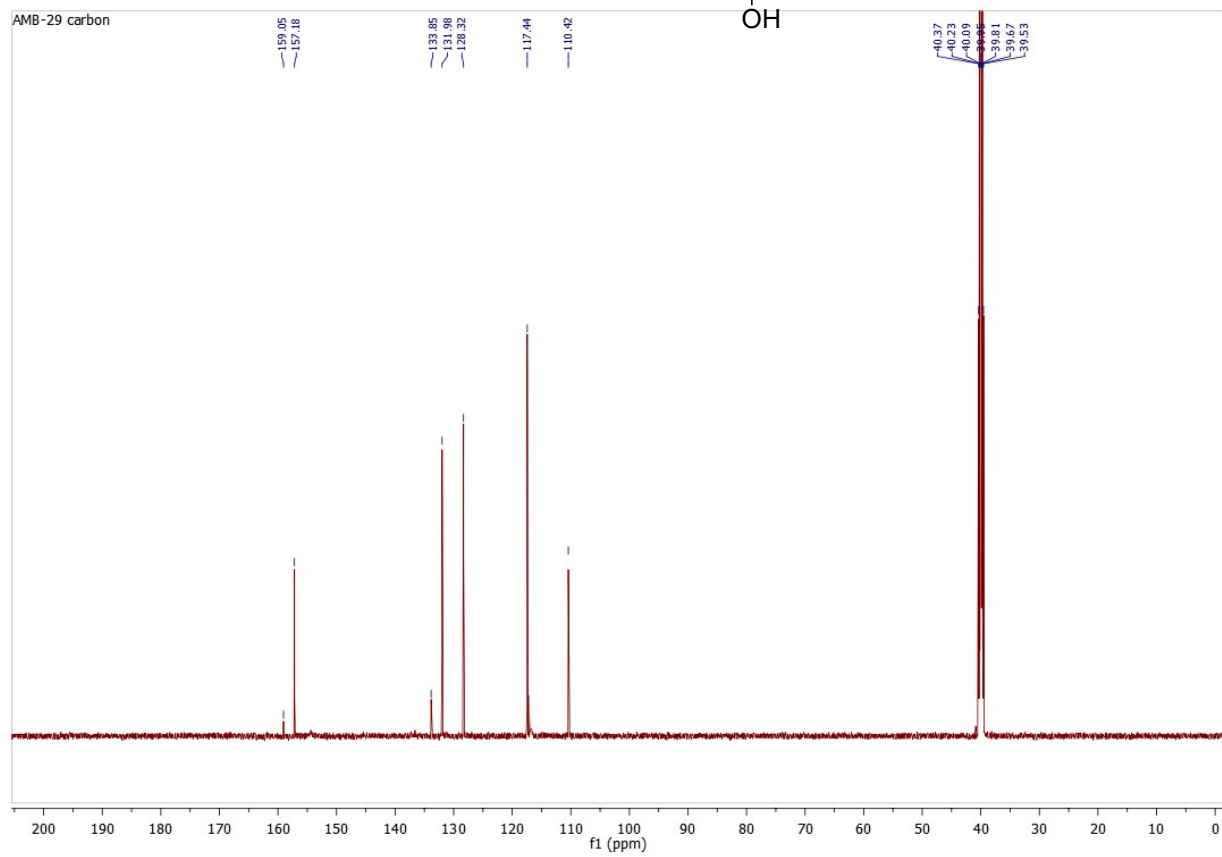



# HRMS of 2-bromo-4-(1H-tetrazol-5-yl)phenol (5l)

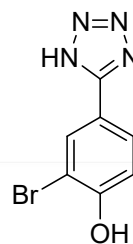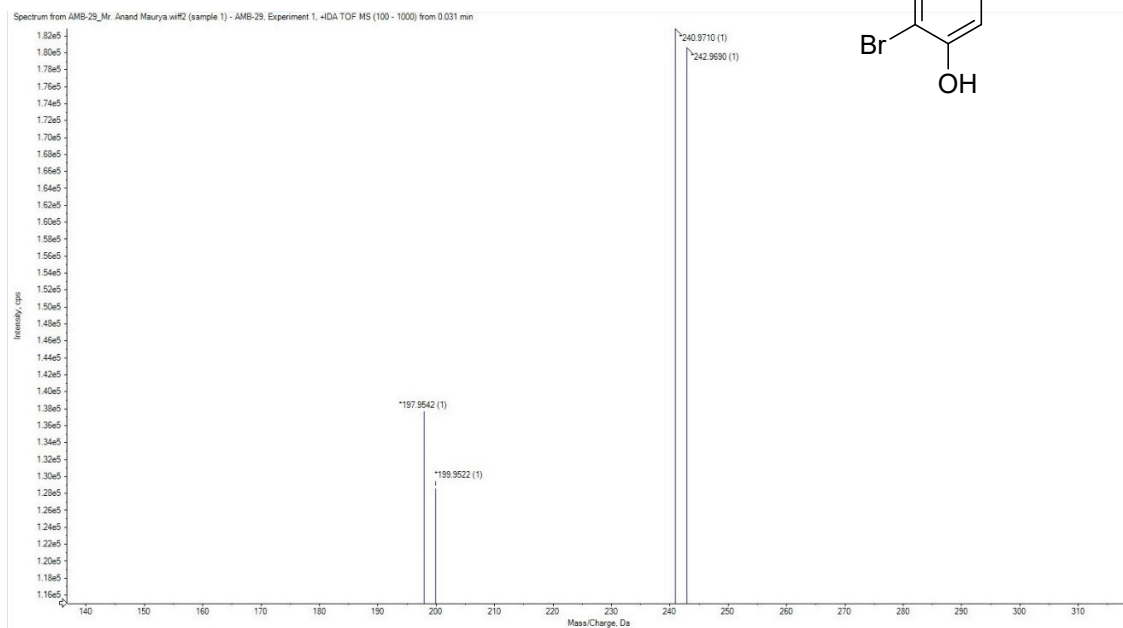

+

-

&

**FT-IR of 2-bromo-4-(1H-tetrazol-5-yl)phenol (5l)**

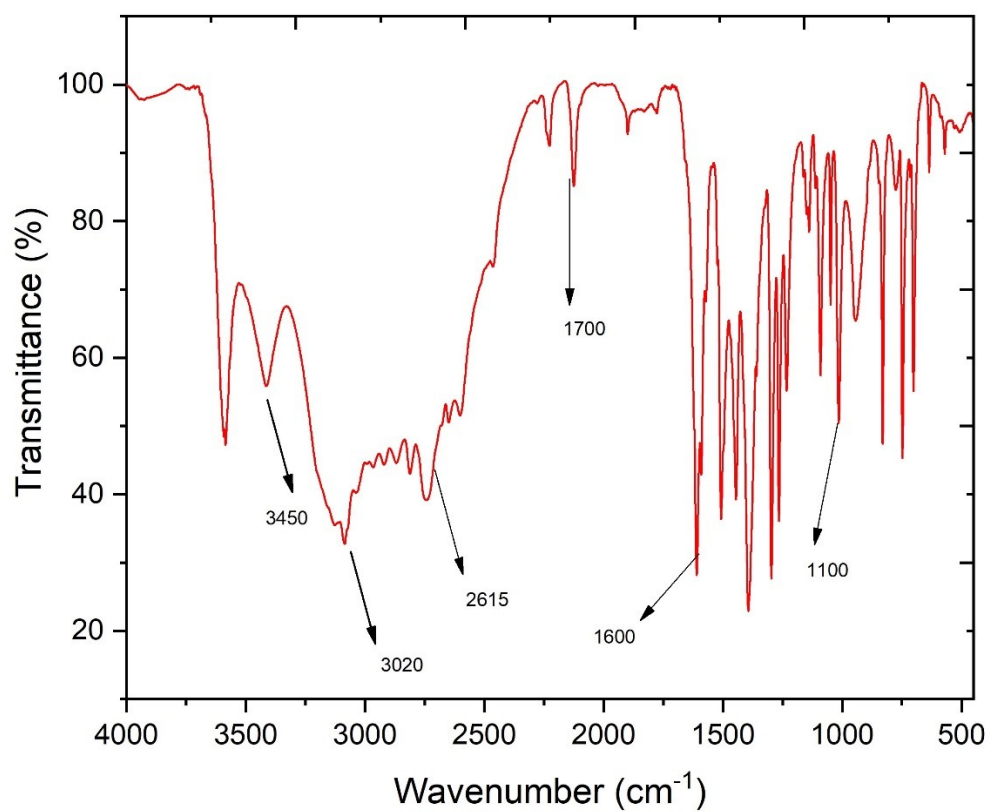

**<sup>1</sup>H NMR of 5-(p-tolyl)-1H-tetrazole (5m)**

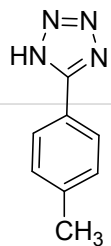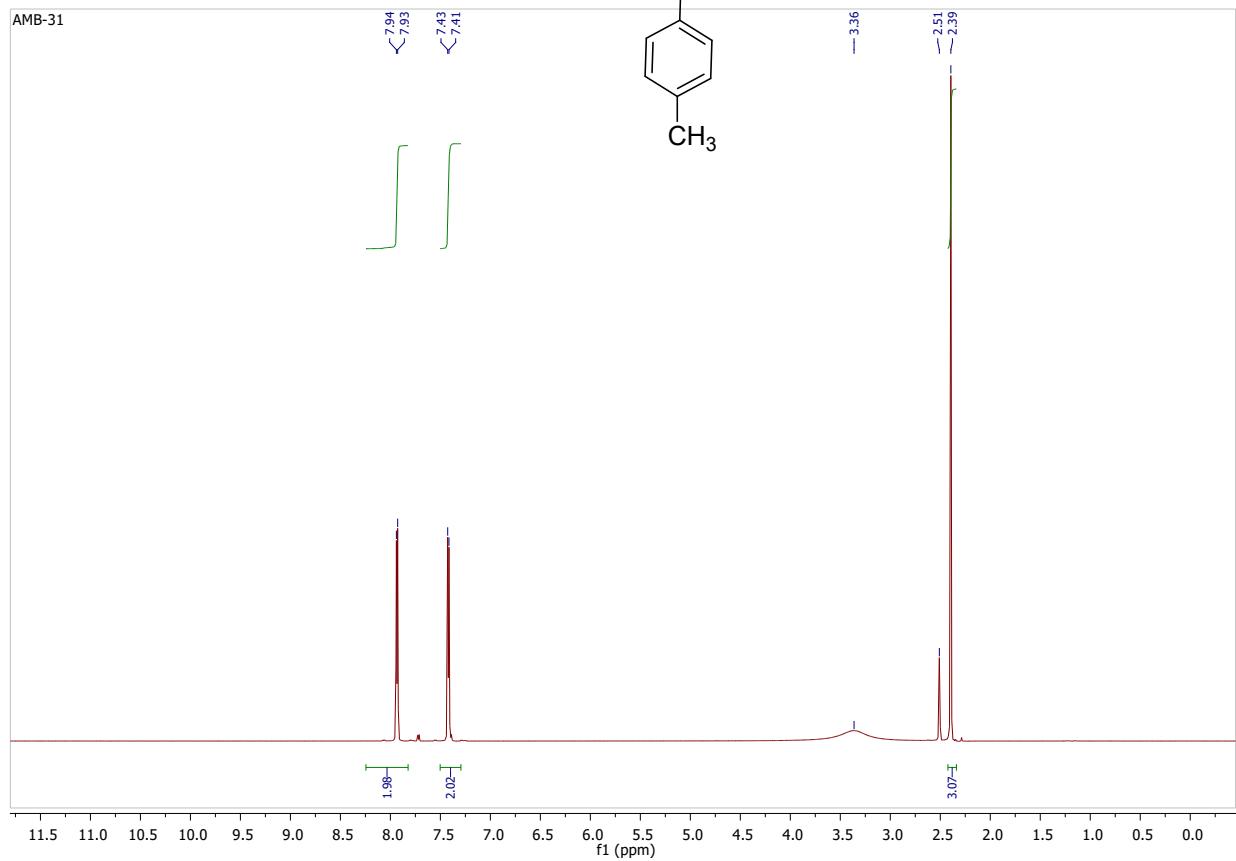

# <sup>13</sup>C NMR of 5-(p-tolyl)-1H-tetrazole (5m)

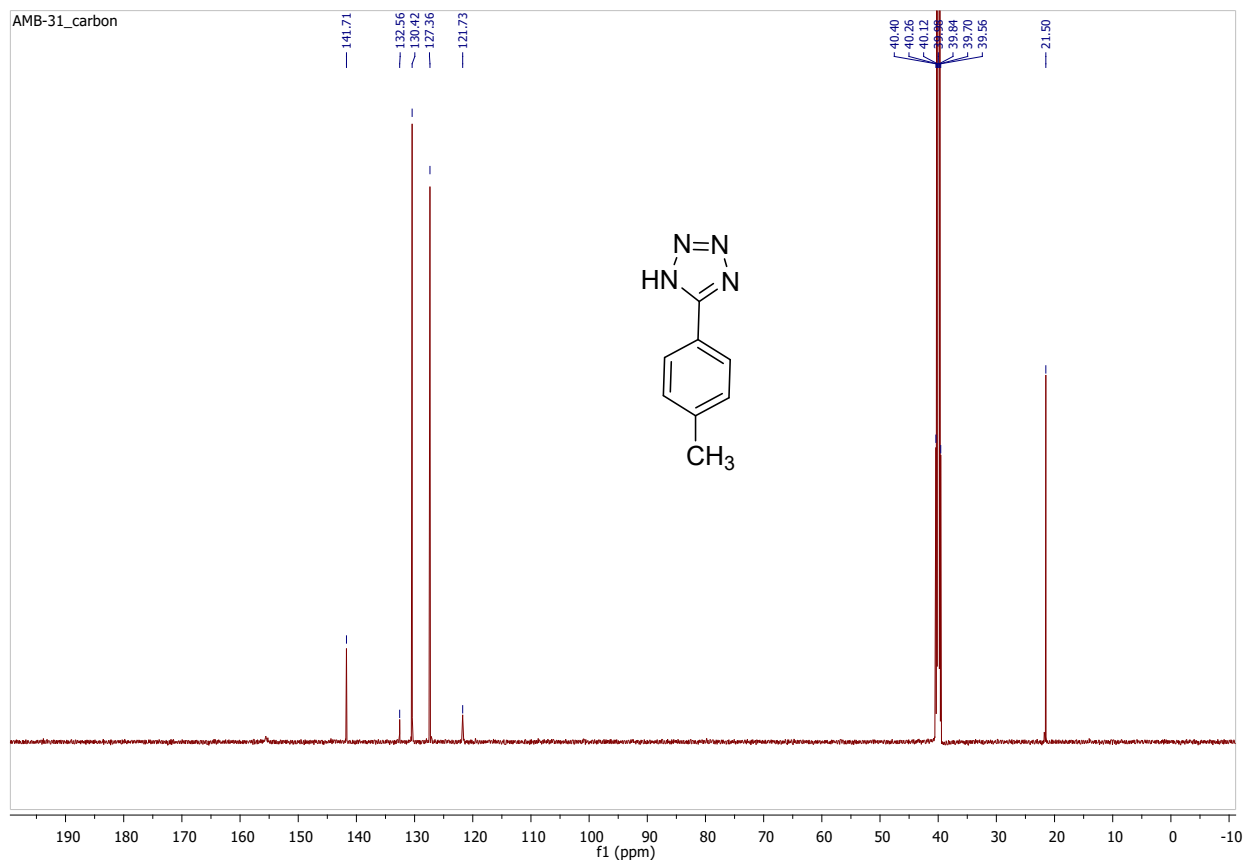

**FT-IR of 5-(p-tolyl)-1H-tetrazole (5m)**

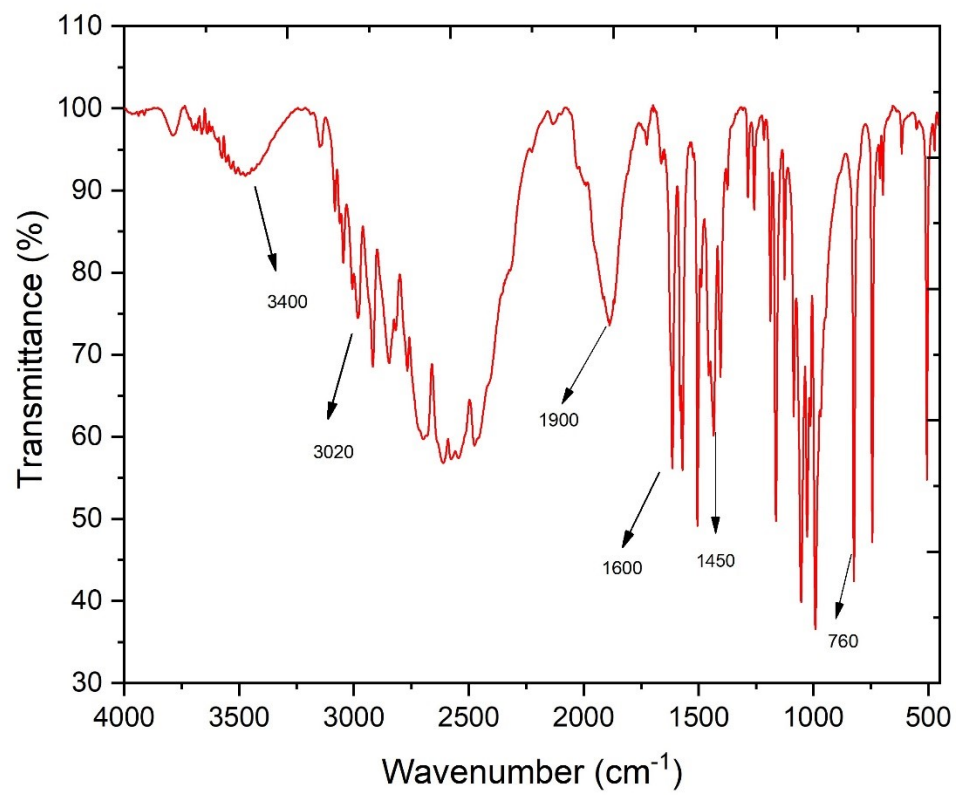



**<sup>1</sup>H NMR of 2-chloro-3-(1H-tetrazol-5-yl)pyridine (5n)**

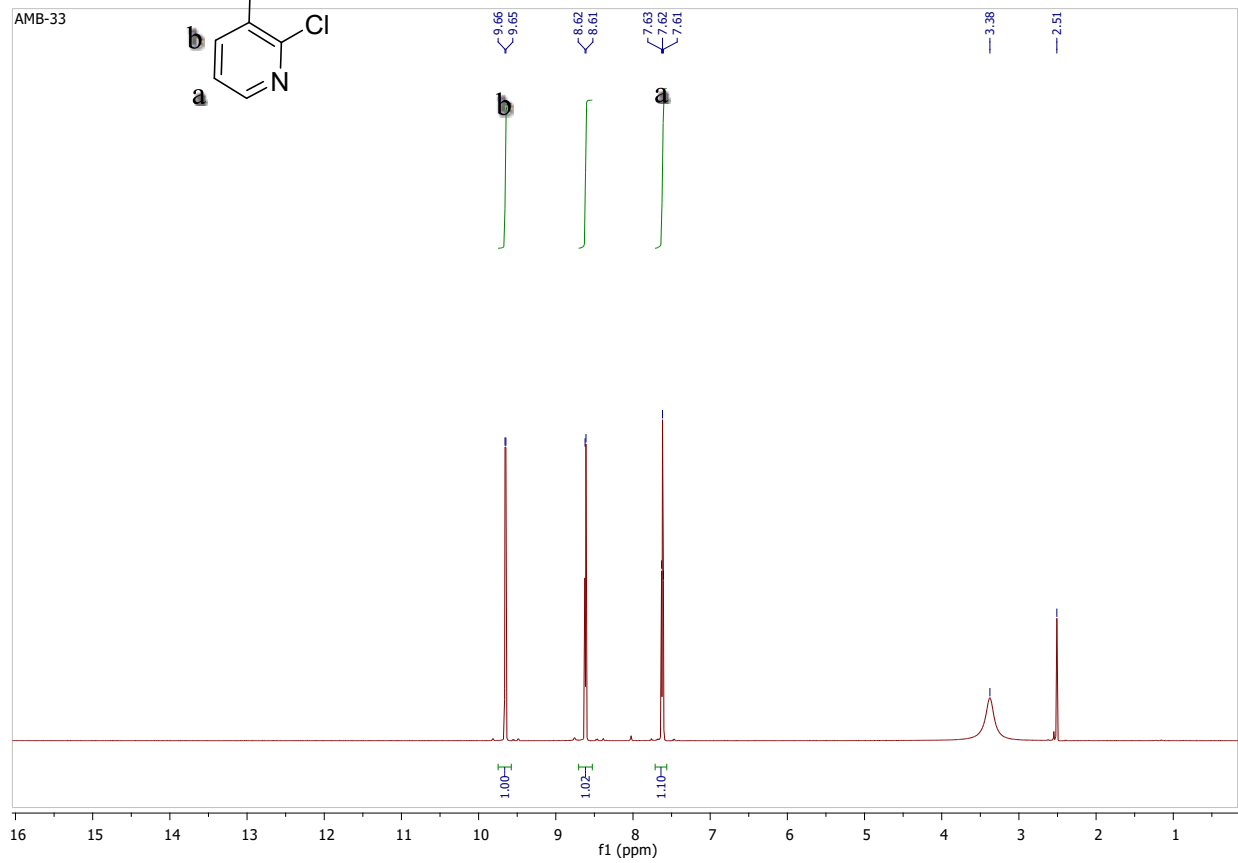

### <sup>13</sup>C NMR of 2-chloro-3-(1H-tetrazol-5-yl)pyridine (5n)

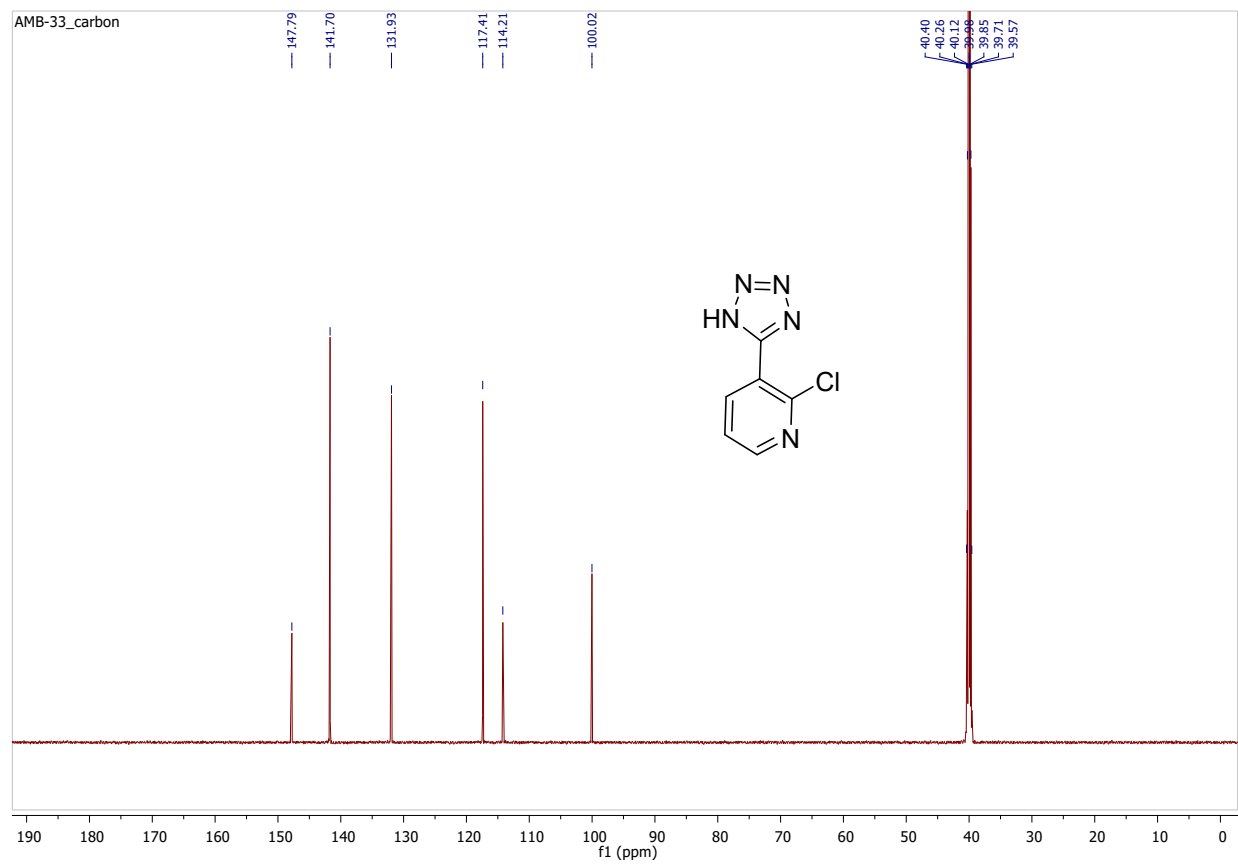



**FT-IR of 2-chloro-3-(1H-tetrazol-5-yl)pyridine (5n)**

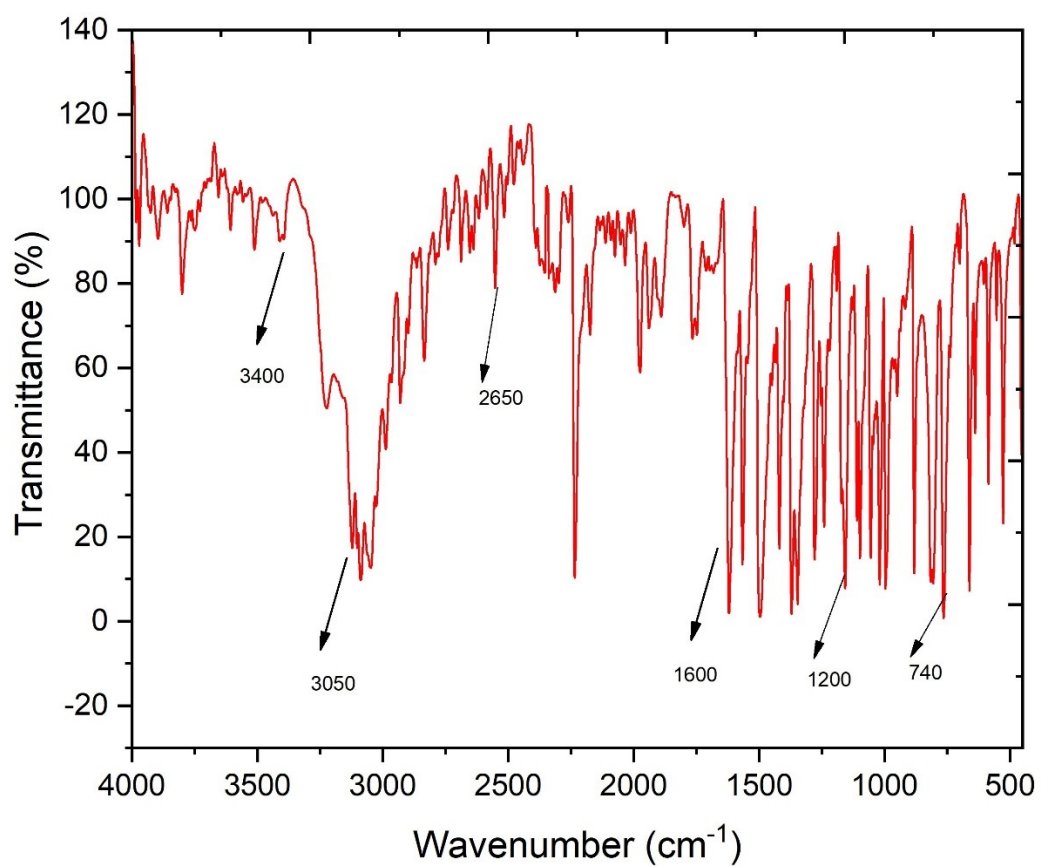

**<sup>1</sup>H NMR of 4-(1H-tetrazol-5-yl)benzaldehyde (5o)**

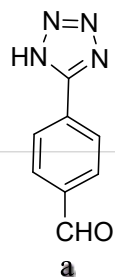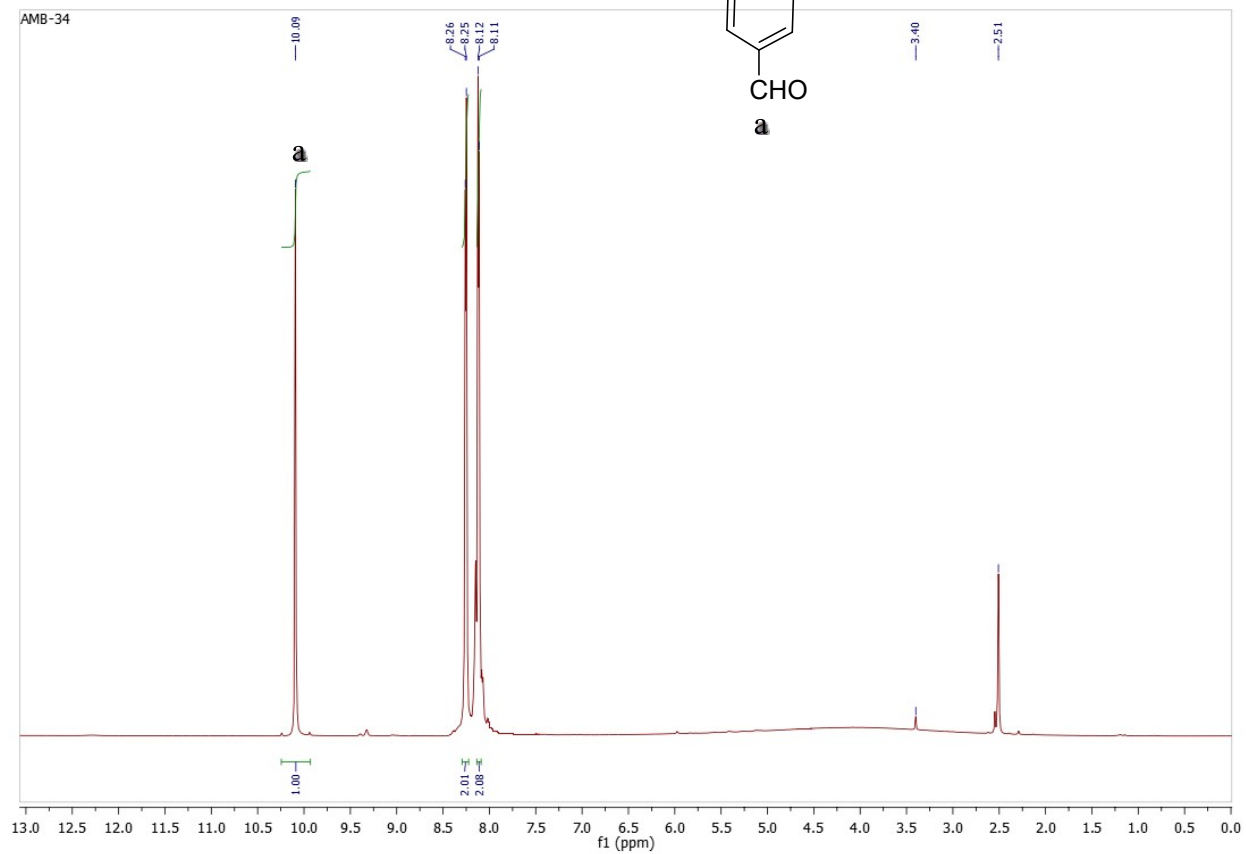

**<sup>13</sup>C NMR of 4-(1H-tetrazol-5-yl)benzaldehyde (5a)**

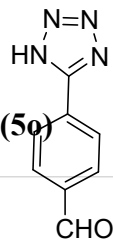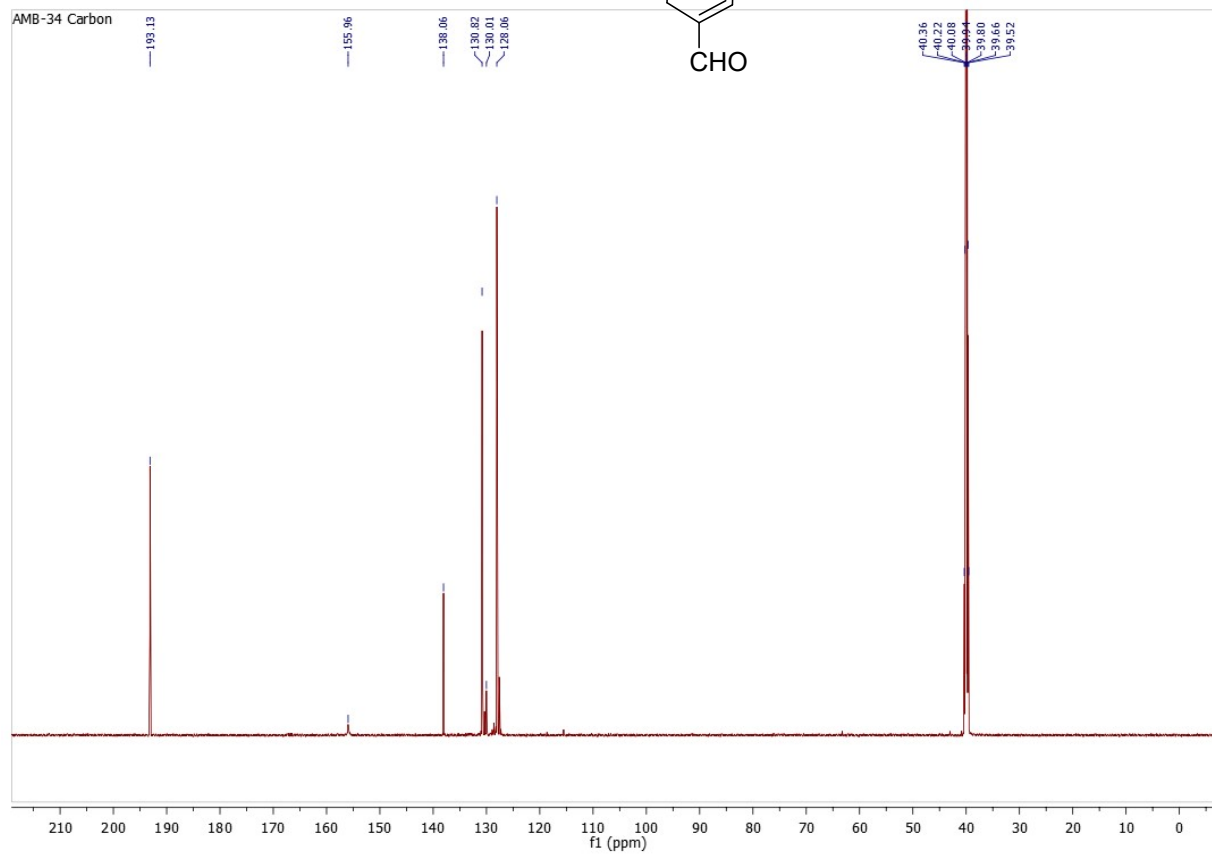

## HRMS of 4-(1H-tetrazol-5-yl)benzaldehyde (5o)

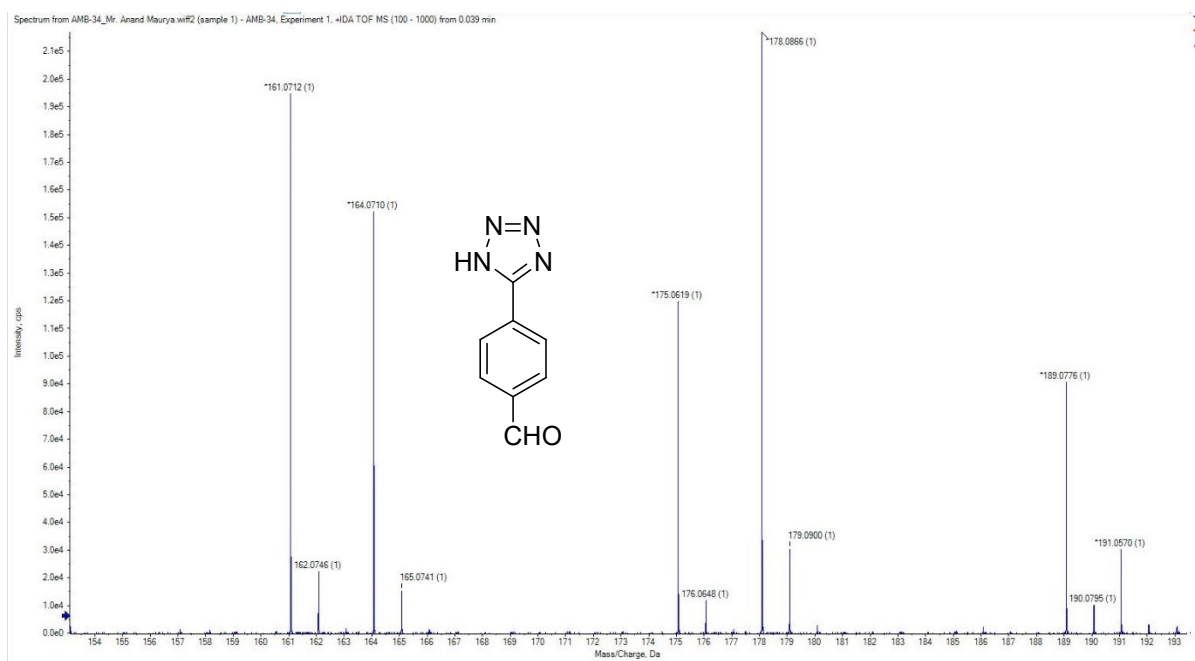

**FT-IR of 4-(1H-tetrazol-5-yl)benzaldehyde (5o)**

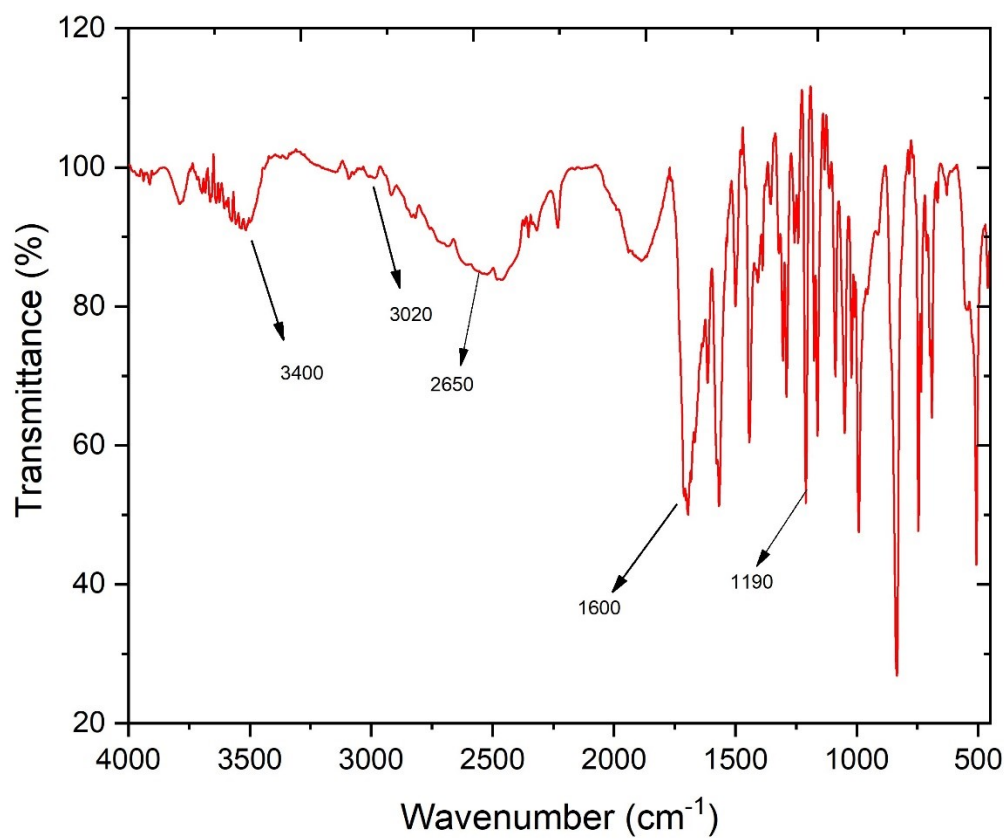

## 6. Physical data of 5-phenyl-1*H*-tetrazole and 4-chloroaniline after the seventh cycle.

### <sup>1</sup>H NMR of 5-phenyl-1*H*-tetrazole

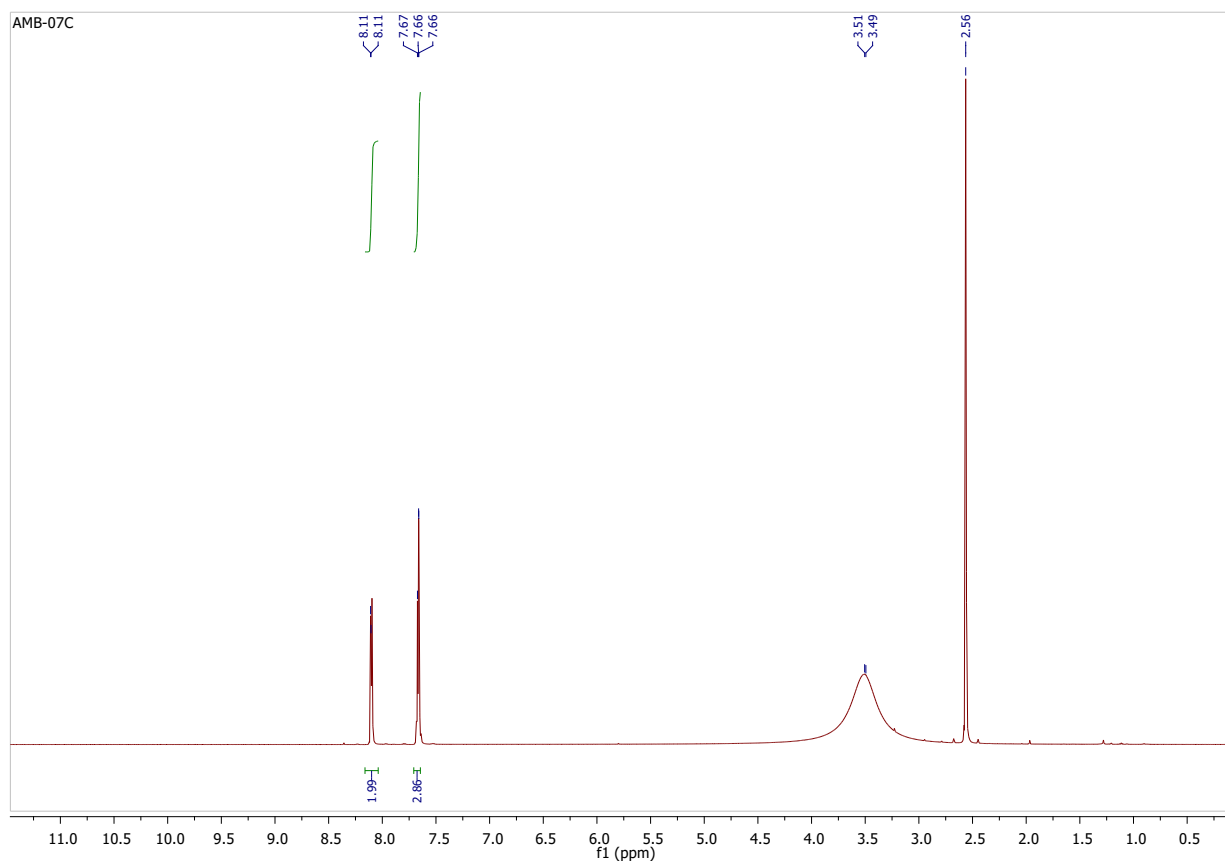

# <sup>1</sup>H NMR of 4-chloroaniline

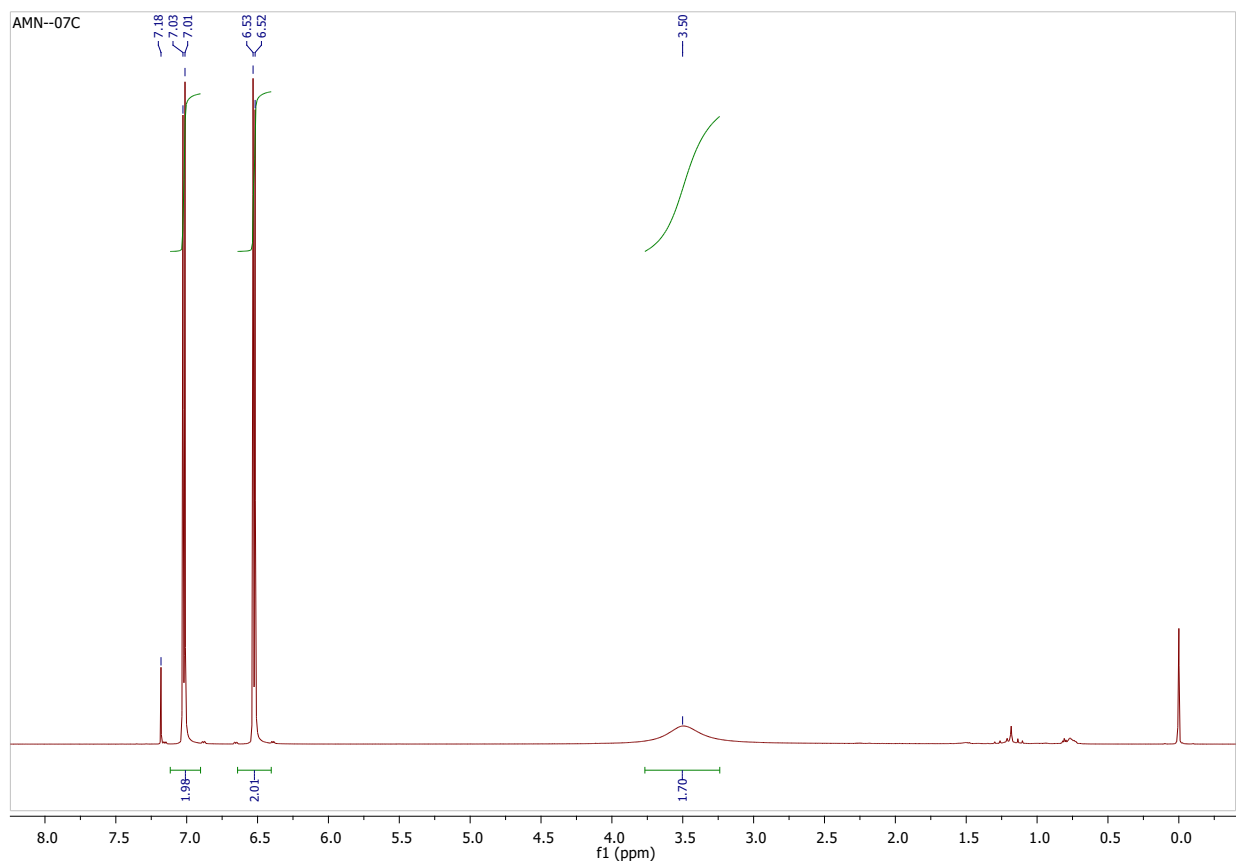

Supplement: d4ra05443a1.pdf [file d4ra05443a1.pdf]
